# Supplementary material for: Mitochondrial volume fraction and translation duration impact mitochondrial mRNA localization and protein synthesis
Source: eLife. 2020 Aug 7;9:e57814. doi: 10.7554/eLife.57814 (PMC7413667; doi:10.7554/eLife.57814)
Supplement: Figure 5—source data 1. — Mitochondrial enrichment of mRNA with and without addition of cycloheximide (Williams et al., 2014), MLR Classification (Saint-Georges et al., 2008), translational efficiency and transcript abundance from previous ribosome profiling dataset (Couvillion et al., 2016), and protein abundance from previous mass spectrometry dataset (Morgenstern et al., 2017) were summarized in the Table. [file elife-57814-fig5-data1.xlsx]

## Sheet: Sheet1
#gene	common.me	mitop2 (Elstner et al 2009)	mito.GO	minus.chx.enriched to mitochondria (Williams et al 2014)	plus.chx.enriched to mitochondria (Williams et al 2014)	om45.2m.log2enrich (Williams et al 2014)	om45.2mchx.log2enrich (Williams et al 2014)	MLR Classification (Saint-Georges et al 2009)	Gly/Glu_RPKS_log2_mRNA (Couvillion et al 2016)	Gly/Glu Ribosome reads log2 (Couvillion et al 2016)	Gly/Glu TE log2 (Couvillion et al 2016)	Glycerol/Glucose proteomics (Morgenstern et al 2017)
YAL001C	TFC3	no	yes	no	no	-0.304528	-0.995304		-0.655248	0.402171	0.317905	0.0437214
YAL002W	VPS8	no	yes	no	no	-0.190223	-0.889488		0.0343614	0.277834	-0.496041	-0.403356
YAL003W	EFB1	no	yes	no	no	-0.210613	-0.449465		-1.42877	-0.60808	0.0811793	-0.486279
YAL005C	SSA1	no	yes	no	no	-0.0344597	-0.336433		-0.801819	0.205584	0.26789	0.899943
YAL007C	ERP2	no	yes	no	no	-0.00027184	-0.702015		-1.16441	-0.106193	0.318703	-0.655786
YAL008W	FUN14	no	yes	no	yes	1.06136	1.7795	Class II	0.00910962	1.30085	0.552225	0.874644
YAL009W	SPO7	no	yes	no	no	0.492866	-0.706002		-0.5666	0.300478	0.127565
YAL010C	MDM10	yes	yes	yes	yes	1.3536	2.07007	Class II	-0.485434	0.580011	0.325932	0.554589
YAL011W	SWC3	no	yes	no	no	-0.374217	-0.388623	Class III	-0.527227	0.028064	-0.184223	-0.760812
YAL012W	CYS3	no	yes	no	no	-0.0661163	-0.533459		-1.83742	-1.22801	-0.130107	-1.51644
YAL013W	DEP1	no	yes	no	no	0.194868	-0.575977		-0.789496	-0.0468314	0.00315109	0.0317089
YAL014C	SYN8	no	yes	no	no	0.0478427	-0.594194		-0.442366	0.603093	0.305945	-0.289013
YAL015C	NTG1	yes	yes	no	no	-0.186186	-0.195845	Class III	-0.617624	0.902022	0.780132	-0.667425
YAL016C-A	YAL016C-A	no	yes				0.261965		0.377062	NA
YAL016W	TPD3	no	yes	no	no	-0.323816	-0.93529		-0.658907	0.0806674	6.1112e-05	0.212202
YAL017W	PSK1	no	yes	no	no	0.0617631	-0.101635		-0.126221	0.661025	0.0477321	0.0881758
YAL018C	YAL018C	no	yes			0.540285	-1.34947			NA
YAL019W	FUN30	no	yes	no	no	-0.0366995	1.03125		-1.42342	-0.528078	0.155829	-0.799841
YAL019W-A	YAL019W-A	no	yes				-0.6125		-0.944866	NA
YAL020C	ATS1	no	yes	no	no	0.148725	-0.588557		-0.461544	-0.12199	-0.39996	0.142958
YAL021C	CCR4	no	yes	no	no	0.105437	0.20123		-0.664983	0.122053	0.0475221	0.1234
YAL022C	FUN26	no	yes	no	no	-0.0706233	-0.830206		-1.10219	-0.267849	0.0948288
YAL023C	PMT2	no	yes	no	no	0.0523978	-0.584519		-1.26678	-0.580893	-0.0536234	-0.525571
YAL024C	LTE1	no	yes	no	no	-0.513108	-0.864346		-0.759323	-0.252124	-0.232315
YAL025C	MAK16	no	yes	no	no	0.0991306	-0.465146		-1.69839	-0.643322	0.315554	-0.450166
YAL026C	DRS2	no	yes	no	no	0.0855621	-0.915264		-1.03972	-0.24513	0.0550725	-0.194269
YAL026C-A	YAL026C-A	no	yes		no	0.267828	-1.14443		-0.809901	-0.0836611	-0.0132738
YAL027W	SAW1	no	yes	no	no	0.375085	-0.480296		0.167139	1.35713	0.450482	-1.66297
YAL028W	FRT2	no	yes		no	0.743201	-0.323895		0.360942	0.534075	-0.566381
YAL029C	MYO4	no	yes	no	no	-0.38403	-0.947843		-1.14004	-0.333559	0.06697	-1.14439
YAL030W	SNC1	no	yes	no	no	0.285705	-0.560895		-0.466434	0.563094	0.290013	-0.318372
YAL031C	GIP4	no	yes	no	no	-0.182179	-0.83275		-0.272336	0.340417	-0.126761	0.146841
YAL032C	PRP45	no	yes	no	no	-0.174401	-0.493602		-0.0880349	0.910045	0.258566	-0.0740006
YAL033W	POP5	yes	yes	no	no	-0.063756	-0.645803		-1.19325	-0.185173	0.268567	-1.05795
YAL034C	FUN19	no	yes	no	no	0.431603	-0.281251		0.726646	3.7874	2.32124	1.60027
YAL034C-B	YAL034C-B	no	yes			#NAME?	-1.93443			-0.350448
YAL034W-A	MTW1	no	yes	no	no	0.264163	-0.441194		-0.589255	0.312517	0.162259	-1.09954
YAL035W	FUN12	no	yes	no	no	-0.804572	-1.65449		-1.57432	-0.919782	-0.0849793	-0.582081
YAL036C	RBG1	no	yes	no	no	-0.132874	-0.498677		-1.19305	-0.495606	-0.0420707	-0.329134
YAL037C-B	YAL037C-B	no	yes				-0.612536			NA
YAL037W	YAL037W	no	yes			0.803321	-1.26103		-1.86395	0.0645899	1.18902
YAL038W	CDC19	no	yes	no	no	-0.00593656	0.194841		-2.30767	-1.23	0.338158	-0.975027
YAL039C	CYC3	yes	yes	no	no	0.533132	0.524407	Class III	0.37237	1.36303	0.251147	0.622326
YAL040C	CLN3	no	yes	no	no	0.345364	-0.284233		-1.12174	0.37379	0.75602
YAL041W	CDC24	no	yes	no	no	-0.259995	-0.430465		-0.667002	0.108733	0.0362218	0.0777397
YAL042C-A	YAL042C-A	no	yes			#NAME?	-1.6125		1.37706	NA
YAL042W	ERV46	no	yes	no	no	0.114452	-0.415248		-1.02402	-0.604944	-0.320434	-0.61588
YAL043C	PTA1	no	yes	no	no	-0.283903	-0.624596		-0.795162	0.0114427	0.0670912	-0.137504
YAL044C	GCV3	yes	yes	no	no	0.249282	0.914788	Class III	-0.438317	0.252536	-0.048661	-0.437553
YAL044W-A	YAL044W-A	no	yes	no	no	0.114908	-0.397599		-0.250737	0.789325	0.300548	1.23509
YAL045C	YAL045C	no	yes			Inf	0.97246			NA
YAL046C	AIM1	no	yes	no	no	0.389405	-0.316326	Class III	0.0999818	0.537471	-0.302024	0.271236
YAL047C	SPC72	no	yes	no	no	-0.500355	-0.801331		-0.415894	0.476438	0.152818	0.16665
YAL047W-A	YAL047W-A	no	yes				-0.612504			NA
YAL048C	GEM1	yes	yes	no	no	-0.203874	-0.828619		-0.0516246	0.99442	0.306531	0.469485
YAL049C	AIM2	no	yes	no	no	0.0160743	-0.603463		-0.230621	1.14315	0.634258	0.666804
YAL051W	OAF1	no	yes	no	no	-0.117658	-1.16959		-0.426837	0.552461	0.239784	-0.103093
YAL053W	FLC2	no	yes	no	no	0.234264	-0.537535		-0.467236	0.407131	0.134853	-0.0155548
YAL054C	ACS1	no	yes		no	1.33636	-0.287803	Class II	6.35188	10.7724	3.68103	4.70694
YAL055W	PEX22	no	yes	no	no	-0.0549645	-0.863013		0.368841	0.811824	-0.296531
YAL056C-A	YAL056C-A	no	yes				-0.612501			NA
YAL056W	GPB2	no	yes	yes	yes	2.11067	2.13793		-0.394986	0.484808	0.14028	0.384143
YAL058W	CNE1	no	yes	no	no	0.0245083	-0.547681		-0.942856	-0.106926	0.0964168	-0.300579
YAL059W	ECM1	no	yes	no	no	0.191887	-0.712433		-2.03798	-1.00363	0.294828	-0.294417
YAL060W	BDH1	no	yes	no	no	-0.305924	-0.51995		1.39573	1.99711	-0.138129	1.52053
YAL061W	BDH2	no	yes	no	no	0.190582	-0.55857		3.46203	2.01312	-2.18842	-0.495886
YAL062W	GDH3	no	yes		no	-0.0711477	-0.388041	Class III	2.52286	4.96395	1.70157	3.14878
YAL063C	FLO9	no	yes			2.80332	-0.649977		-0.415343	1.34999	1.02582
YAL066W	YAL066W	no	yes				0.387499			NA
YAL067C	SEO1	no	yes			1.411	-0.344014		1.77916	4.26426	1.74559
YAR002C-A	ERP1	no	yes	no	no	-0.0339438	-0.635008		-0.744884	0.0392046	0.0445748	-0.189933
YAR002W	NUP60	no	yes	no	no	-0.275811	-0.721367		-1.47313	-0.478303	0.255313	-0.299014
YAR003W	SWD1	no	yes	no	no	0.141963	-0.385512		-1.1585	-0.455941	-0.0369497	-0.0473057
YAR007C	RFA1	no	yes	no	no	-0.201587	-0.715523		-0.88313	0.00011635	0.143732	0.0166693
YAR008W	SEN34	no	yes	no	no	-0.146638	-0.688703		-1.16977	0.0113207	0.441572	-3.02975
YAR009C	YAR009C	no	yes			-0.897121	-1.61252		-0.349219	0.0671232	-0.323172
YAR014C	BUD14	no	yes	no	no	-0.0643711	-0.909736		-1.12386	-0.192162	0.192181	-0.443607
YAR015W	ADE1	no	yes	no	no	0.114746	-0.317509		-1.98044	-1.34769	-0.10676	-0.798015
YAR018C	KIN3	no	yes	no	no	-0.179352	-0.762497		-0.99067	0.190121	0.441277
YAR019C	CDC15	no	yes	no	no	-0.124873	-0.743747		-0.473336	0.175813	-0.0903651	-0.219242
YAR019W-A	YAR019W-A	no	yes			Inf	-0.988012			NA
YAR020C	PAU7	no	yes				-0.349469		-0.622938	NA
YAR023C	YAR023C	no	yes			#NAME?	-0.612503		0.0875554	0.0645899	-0.762479
YAR027W	UIP3	no	yes	no	no	0.0810401	-0.853743		-0.192047	0.539332	-0.0081355	-1.05311
YAR028W	YAR028W	no	yes	no	no	0.28802	-0.532825		-1.29246	-0.504845	0.0481059
YAR029W	YAR029W	no	yes				-2.02754		-1.29036	NA
YAR031W	PRM9	no	yes		no	-0.351957	-0.697895		-0.960439	0.307936	0.528861	0.343954
YAR033W	MST28	no	yes		no	-0.416356	-0.91659		-2.10241	-1.64323	-0.280336
YAR035W	YAT1	yes	yes	no	no	0.513487	-0.415835	Class II	2.12906	4.20335	1.33478	2.82046
YAR042W	SWH1	no	yes	no	no	0.161395	-0.484179		-0.243798	0.667566	0.171851	0.543301
YAR047C	YAR047C	no	yes				1.38749		1.50259	NA
YAR050W	FLO1	no	yes			Inf	-0.612507		-0.58658	1.34999	1.19706
YAR066W	YAR066W	no	yes				0.972451		1.35107	0.936075	-1.15451
YAR073W	IMD1	no	yes			0.803312	-2.61248		-1.31042	0.00190865	0.572817	-0.476175
YBL001C	ECM15	no	yes	no	no	0.0289887	-0.615577		0.197006	0.875159	-0.0613604	0.655426
YBL002W	HTB2	no	yes	no	no	0.0396578	-0.625148		-0.978221	0.305821	0.544528	-0.460895
YBL003C	HTA2	no	yes	no	no	-0.086923	-0.624296		-1.17913	0.211531	0.651149	-0.00449117
YBL004W	UTP20	no	yes	no	no	-0.57708	-1.21464		-1.44395	-0.628668	0.0757695	-0.523972
YBL005W	PDR3	no	yes	no	no	0.415911	-0.549794		-1.05331	-0.573702	-0.259903
YBL005W-A	YBL005W-A	no	yes		no	1.04368	-1.05784		-1.73037	-1.3223	-0.331436	-2
YBL005W-B	YBL005W-B	no	yes		no	0.840797	-1.03615		-0.423859	-0.570301	-0.885956	-2
YBL006C	LDB7	no	yes	no	no	0.0541438	-0.500952		-0.800053	-0.346473	-0.285934	-0.574694
YBL006W-A	YBL006W-A	no	yes			#NAME?	-1.3262			NA
YBL007C	SLA1	no	yes	no	no	-0.393193	-0.807021		-0.9318	-0.278359	-0.086073	0.163999
YBL008W	HIR1	no	yes	no	no	0.0997146	0.292047		-1.047	0.0927076	0.400193	0.744743
YBL008W-A	YBL008W-A	no	yes		no	1.21836	-0.472573		-0.544936	NA
YBL009W	ALK2	no	yes	no	no	0.0214671	0.199893		-0.98334	0.123914	0.367741
YBL010C	YBL010C	no	yes	no	no	0.264752	-0.730073		-0.575632	-0.243532	-0.407414	-0.483602
YBL011W	SCT1	no	yes	no	no	0.207094	-0.465891		-0.644175	-0.248799	-0.344137	-1.03103
YBL013W	FMT1	yes	yes	yes	yes	2.31735	3.13641	Class II	0.600837	1.18195	-0.158404	1.20163
YBL014C	RRN6	no	yes	no	no	0.124492	-0.762115		-1.03307	-0.662392	-0.368839
YBL015W	ACH1	yes	yes	no	yes	0.0239082	2.38772	Class II	4.11328	5.21938	0.366589	2.34552
YBL016W	FUS3	no	yes	no	no	0.181433	-0.655787		-0.789086	0.657199	0.706772	-1.01639
YBL017C	PEP1	no	yes	no	no	0.102904	-0.502405		-0.834485	-0.121223	-0.0262513	-0.0382326
YBL018C	POP8	yes	yes	no	no	0.0808556	-0.541359		-0.983528	-0.305825	-0.0618106	-0.879146
YBL019W	APN2	no	yes	no	no	0.218359	-0.66399		0.0217967	0.89018	0.12887
YBL020W	RFT1	no	yes	no	no	-0.134978	-0.563514		-0.210237	0.727244	0.197967	0.210767
YBL021C	HAP3	no	yes	no	no	0.371559	-0.376318		0.296231	0.895418	-0.140327
YBL022C	PIM1	yes	yes	no	yes	0.699732	2.4523	Class I-2	-0.771542	0.338658	0.370686	0.137786
YBL023C	MCM2	no	yes	no	no	-0.203818	-0.85459		-1.18515	-0.535875	-0.0902359	0.0734121
YBL024W	NCL1	no	yes	no	no	-0.284669	-0.699718		-1.53588	-0.630087	0.166284	-0.401238
YBL025W	RRN10	no	yes	no	no	-0.135584	-0.64363		-0.228307	0.380366	-0.130841
YBL026W	LSM2	no	yes	no	no	-0.250331	-0.71077		-0.960808	0.676942	0.898236	0.1327
YBL027W	RPL19B	no	yes	no	no	-0.20042	-0.419689		-1.58283	-0.794115	0.0492028	-0.589659
YBL028C	YBL028C	no	yes	no	no	0.0529755	-0.515461		-1.88645	-0.654466	0.492469	-0.917538
YBL029C-A	YBL029C-A	no	yes	no	no	-0.00285512	-0.433533		0.789844	2.21506	0.685705	0.780416
YBL029W	YBL029W	no	yes		no	-0.2146	-0.511574		-1.99733	0.400525	1.65834
YBL030C	PET9	yes	yes	yes	yes	1.30921	3.06129	Class II	1.20267	2.04402	0.101838	1.54382
YBL031W	SHE1	no	yes	no	no	-0.155099	-0.534218		-0.385899	-0.205397	-0.559012
YBL032W	HEK2	no	yes	no	no	-0.11433	-0.406969		-1.16828	-0.33004	0.0987244	-0.220755
YBL033C	RIB1	no	yes	no	no	0.0334998	-0.528411		0.739993	1.59949	0.119981	0.196191
YBL034C	STU1	no	yes	no	no	-0.09369	-0.976445		-0.698017	0.194503	0.153007	-0.440573
YBL035C	POL12	no	yes	no	no	-0.145981	-0.67248		-0.979467	-0.264938	-0.0249843	-0.423156
YBL036C	YBL036C	no	yes	no	no	-0.0557038	-0.691007		-1.14113	-0.000505142	0.401113	-0.250439
YBL037W	APL3	no	yes	no	no	-0.324596	-1.11388		-0.315345	0.668515	0.244346	-0.296982
YBL038W	MRPL16	yes	yes	no	yes	0.656351	2.24361	Class I-2	0.11127	1.62552	0.774733	1.31005
YBL039C	URA7	no	yes	no	no	-0.152331	-0.338343	Class III	-2.19387	-1.43412	0.0202435	-0.539973
YBL039C-A	YBL039C-A	no	yes	no		0.0435253	-0.582129		-2.1647	-1.37461	0.0505752
YBL039W-B	YBL039W-B	no	yes		no	0.305822	-0.466524		1.45506	4.503	2.30843
YBL040C	ERD2	no	yes	no	no	0.0890249	-0.98458		-1.12356	-0.0893915	0.294658
YBL041W	PRE7	no	yes	no	no	-0.226181	-0.437453		-0.984184	0.0539426	0.298613	0.0905483
YBL042C	FUI1	no	yes	no	no	-0.207337	-0.750275		-1.1907	-0.707206	-0.256017
YBL043W	ECM13	no	yes		no	0.955325	-0.361695		5.51092	6.99266	0.742233
YBL044W	YBL044W	no	yes			#NAME?	-2.02754			NA
YBL045C	COR1	yes	yes	no	yes	-0.0653866	1.94274	Class II	1.596	2.95135	0.615835	1.62077
YBL046W	PSY4	no	yes	no	no	-0.11179	-0.670621		-0.796003	-0.396596	-0.340107	-0.317267
YBL047C	EDE1	no	yes	no	no	-0.455757	-1.06195		-0.664668	0.0592844	-0.0155612	0.0862324
YBL048W	RRT1	no	yes				-0.875536		4.91622	NA
YBL049W	MOH1	no	yes		no	1.69229	-0.36196		3.49808	5.2445	1.00691	2
YBL050W	SEC17	no	yes	no	no	-0.249992	0.495229		-0.564521	0.20946	0.0344679	0.208304
YBL051C	PIN4	no	yes	no	no	0.00997411	-0.59834		-0.663248	0.688902	0.612636	0.129102
YBL052C	SAS3	no	yes	no	no	0.176336	0.447618		-1.304	0.497549	1.06204	-0.436099
YBL054W	TOD6	no	yes	no	no	-0.0741945	-0.229783		-2.14524	-0.710327	0.695396	-0.947533
YBL055C	YBL055C	no	yes	no	no	0.356218	0.813628		-1.68707	-0.315135	0.63242	-0.218361
YBL056W	PTC3	no	yes	no	no	-0.00760287	-0.563348		-0.741918	0.151201	0.153605	0.107382
YBL057C	PTH2	no	yes	no	yes	0.301615	1.63746	Class II	-1.12174	-0.252636	0.129595	-0.543422
YBL058W	SHP1	no	yes	no	no	-0.396772	-0.685217		-0.994159	-0.389849	-0.135203	0.200045
YBL059C-A	CMC2	no	yes	no	no	-0.095007	-0.504535		0.36112	1.57406	0.473428	0.858282
YBL059W	YBL059W	no	yes	no	no	-0.234153	-0.414337	Class III	1.29972	2.29374	0.254505
YBL060W	YEL1	no	yes	no	no	0.0498533	-0.721914		-0.800042	0.404682	0.46521
YBL061C	SKT5	no	yes	no	no	-0.153416	-0.840455		-1.56904	-0.231239	0.598283	-1.32773
YBL063W	KIP1	no	yes	no	no	-0.104292	-0.924507		-1.10222	0.367022	0.729724
YBL064C	PRX1	yes	yes	no	yes	0.411958	2.39535	Class III	1.77256	2.78934	0.277259	1.99827
YBL066C	SEF1	no	yes	no	no	-0.150686	-0.597737		1.14767	2.54735	0.660173	0.0995357
YBL067C	UBP13	no	yes	no	no	0.431088	0.653625		0.174542	1.28792	0.373866	1.42931
YBL068W	PRS4	no	yes	no	no	0.0287738	-0.763915		-1.15141	0.125058	0.536958	-0.538437
YBL068W-A	YBL068W-A	no	yes	no		0.753956	0.758753		-0.707002	-0.233315	-0.265826	-0.0287829
YBL069W	AST1	no	yes	no	no	0.112334	0.315241		-1.20041	-0.0813894	0.379503	-0.0287829
YBL071C	YBL071C	no	yes			-2.3666	-0.834895			NA
YBL071C-B	YBL071C-B	no	yes			-0.588996	-0.688452		-1.14901	NA
YBL071W-A	KTI11	no	yes	no	no	-0.147662	-0.411741		-0.959588	-0.434981	-0.214907
YBL072C	RPS8A	no	yes	no	no	-0.205198	-0.4815		-1.50105	-0.609929	0.151611	-0.610222
YBL074C	AAR2	no	yes	no	no	-0.426659	-0.86278		-0.687855	0.257865	0.206207	1
YBL075C	SSA3	no	yes		no	1.81173	-0.143018		0.575255	4.32198	3.00721	3.49337
YBL076C	ILS1	no	yes	no	no	0.561121	0.471105		-1.74198	-1.04768	-0.0452123	-0.758926
YBL078C	ATG8	no	yes	no	no	0.159369	-0.72736		1.58517	2.82227	0.497587	-0.537476
YBL079W	NUP170	no	yes	yes	yes	1.78808	1.80127		-0.92535	-0.128472	0.0573645	0.0921447
YBL080C	PET112	yes	yes	no	no	-0.0237753	1.13667	Class I-2	-0.149972	1.41113	0.821593	0.419084
YBL081W	YBL081W	no	yes	no	no	0.230886	-0.546665		-1.81299	-0.488684	0.584792
YBL082C	ALG3	no	yes	no	no	-0.00879832	-0.53758		-0.798584	0.103354	0.162424
YBL083C	YBL083C	no	yes	no		-0.316678	-1.09793		-0.664607	0.0373684	-0.0375381
YBL084C	CDC27	no	yes	no	no	0.0382571	-0.622179		-0.659901	0.711067	0.631454	-2.5025
YBL085W	BOI1	no	yes	no	no	-0.574789	-0.927014		-0.901654	0.0122523	0.174393	-0.36257
YBL086C	YBL086C	no	yes	no	no	-0.0446753	-0.531075		-0.755186	0.3424	0.358072	0.17166
YBL087C	RPL23A	no	yes	no	no	-0.0865347	-0.421146	Class III	-1.59339	-0.755624	0.0982488	-0.668974
YBL088C	TEL1	no	yes	no	no	-0.623902	-1.46993		0.159865	0.262529	-0.636849
YBL089W	AVT5	no	yes	no	no	0.423943	-0.742564		-0.598758	0.34201	0.201254
YBL090W	MRP21	yes	yes	no	no	0.105043	0.0738615	Class I-1	-0.146035	1.17213	0.57865	0.951512
YBL091C	MAP2	no	yes	no	no	-0.15218	-0.800955		-1.20833	-0.399395	0.0694175	-0.43917
YBL091C-A	SCS22	no	yes	no	no	0.13882	-0.63372		-0.348181	-0.17357	-0.564902
YBL092W	RPL32	no	yes	no	no	-0.235724	-0.529155		-1.46554	-0.601461	0.124563	-0.618788
YBL093C	ROX3	no	yes	no	no	-0.0239763	-0.539831		-1.53616	-0.659552	0.137096
YBL094C	YBL094C	no	yes				-0.612504		-0.30101	NA
YBL095W	YBL095W	no	yes	no	yes	1.11356	1.80801	Class III	0.147723	2.05989	1.17266	0.468414
YBL097W	BRN1	no	yes	no	no	-0.274832	-0.921296		-1.26651	-0.0874132	0.43958	-0.0437214
YBL098W	B4	no	yes	no	no	0.0125496	-0.736473	Class III	-0.902121	0.319637	0.482245	0.185504
YBL099W	ATP1	yes	yes	no	yes	0.123809	3.14596	Class I-2	1.70085	2.6799	0.239535	1.92324
YBL100W-A	YBL100W-A	no	yes			0.218359	-0.612505		-0.317941	0.899981	0.478408
YBL100W-B	YBL100W-B	no	yes			-0.296208	-0.360973		-0.391587	0.628407	0.28048
YBL100W-C	YBL100W-C	no	yes			#NAME?	-0.875538			NA
YBL101C	ECM21	no	yes	no	no	-0.0582644	-0.554495		0.195016	0.832251	-0.102279	0.511277
YBL102W	SFT2	no	yes	no	no	0.0430474	-0.696697		-0.615875	0.37557	0.251931	0.0889736
YBL103C	RTG3	no	yes	no	no	0.218359	-0.776638		-0.566057	1.06219	0.888733	-0.397811
YBL104C	YBL104C	no	yes	no	no	0.353832	-0.54823		-0.712383	0.0904481	0.0633172	-0.0941824
YBL105C	PKC1	no	yes	no	no	-0.0553549	-1.11063		-0.566618	0.553647	0.380751	0.249893
YBL106C	SRO77	no	yes	no	no	-0.0143753	-0.411348		-0.676377	0.0149485	-0.0481879	0.147557
YBL107C	YBL107C	no	yes	no	no	-0.0839104	-0.476591		-0.94023	0.126712	0.327428	-0.768674
YBL108W	YBL108W	no	yes			#NAME?	-1.02754			NA
YBL109W	YBL109W	no	yes				-0.197464		-0.430293	NA
YBL113C	YBL113C	no	yes			#NAME?	-0.612568		-0.55134	-0.273826	-0.462	0.14439
YBR001C	NTH2	no	yes	no	no	-0.0293761	-0.917335		0.633955	1.58785	0.21438	0.82103
YBR002C	RER2	no	yes	no	no	0.448227	0.470829		-1.26887	-0.961882	-0.432527	-0.841935
YBR003W	COQ1	yes	yes	yes	yes	2.07089	2.91131	Class I-2	-0.737697	0.221153	0.219337	-0.279346
YBR004C	GPI18	no	yes	no	no	0.444563	-0.82268		-1.56469	-0.00861996	0.816559
YBR005W	RCR1	no	yes	no	no	0.283129	-0.489542		0.169257	0.596023	-0.312748	-0.177324
YBR006W	UGA2	no	yes	no	no	0.0875611	-0.0980947		0.976821	1.90905	0.192711	0.626261
YBR007C	DSF2	no	yes	no	no	-0.00245921	-0.714252		-1.31055	-0.383114	0.187926	0.0314496
YBR008C	FLR1	no	yes			-1.78162	-0.679615		-0.851321	NA
YBR009C	HHF1	no	yes	no	no	0.0964285	-0.695675		-0.828547	0.24026	0.329293	-0.0333713
YBR010W	HHT1	no	yes	no	no	0.0396617	-0.423102		-0.760729	0.207254	0.228469	-0.0138042
YBR011C	IPP1	no	yes	no	no	-0.0451907	-0.501976		-1.03473	0.0182653	0.313484	-0.310943
YBR012C	YBR012C	no	yes		no	-0.888556	-0.839165		-1.38193	-1.93541	-1.29299
YBR012W-A	YBR012W-A	no	yes			0.218359	0.194854		-0.263515	0.686694	0.210696
YBR012W-B	YBR012W-B	no	yes			-0.3666	-0.686493		-0.346608	0.565043	0.172138
YBR013C	YBR013C	no	yes	no	no	0.594327	-0.693477		-0.168372	1.10619	0.535049
YBR014C	GRX7	no	yes	no	no	-0.220669	-0.777393	Class II	-0.318083	0.702355	0.280925	0.258901
YBR015C	MNN2	no	yes	no	no	0.11723	-0.501522		-0.780216	0.0978	0.138503	-0.291959
YBR016W	YBR016W	no	yes	no	no	0.203868	-0.496344		-0.282684	0.689693	0.232863	0.628744
YBR017C	KAP104	no	yes	no	no	-0.365632	-0.972478		-1.30577	-0.550213	0.0160416	-0.380513
YBR018C	GAL7	no	yes			#NAME?	1.01093		-1.77494	-0.350448	0.68498	0.36526
YBR019C	GAL10	no	yes		no	-2.78163	-0.966685		-2.32338	0.386518	1.97038	0.760317
YBR020W	GAL1	no	yes				0.972467		0.245418	NA		1.4239
YBR021W	FUR4	no	yes	no	no	-0.196678	-0.648253		-0.978896	-0.772768	-0.533385
YBR022W	POA1	no	yes	no	no	-0.283187	0.053177		-0.304256	1.07895	0.643687	0.667544
YBR023C	CHS3	no	yes	no	no	-0.26356	-0.782785		-1.18269	-0.0888013	0.354379	-1.43781
YBR024W	SCO2	yes	yes	yes	yes	1.30215	2.93613	Class I-2	0.627157	1.51636	0.14969	0.453409
YBR025C	OLA1	no	yes	no	yes	0.53902	1.60742		-1.35325	-0.278475	0.335265	-0.271988
YBR026C	ETR1	yes	yes	no	yes	0.929425	2.93739	Class II	1.14445	2.09127	0.207307	1.49526
YBR027C	YBR027C	no	yes		no	1.35586	0.722116		0.177753	NA
YBR028C	YBR028C	no	yes	no	no	-0.492383	-0.698823		-0.484218	0.642559	0.387263	-0.678072
YBR029C	CDS1	yes	yes	no	no	-0.0989817	-0.84269	Class II	-0.687986	0.317782	0.266255	-0.646016
YBR030W	RKM3	no	yes	no	no	-0.0849189	-0.569327		-1.04951	-0.765485	-0.455488	-0.761367
YBR031W	RPL4A	no	yes	no	no	-0.142812	-0.721488		-1.4565	-0.846337	-0.129355	-0.84606
YBR032W	YBR032W	no	yes				-0.0275425			NA
YBR033W	EDS1	no	yes		no	0.305822	0.127795		4.94995	6.09911	0.409648
YBR034C	HMT1	no	yes	no	no	-0.0584386	-0.565543	Class III	-1.56878	-0.445288	0.383981	-0.125612
YBR035C	PDX3	no	yes	no	no	0.0511823	-0.218614		-0.218977	0.512429	-0.00810734	0.0819282
YBR036C	CSG2	no	yes	no	no	-0.0568015	-0.779368		-0.329593	0.458211	0.0482898	-1.5025
YBR037C	SCO1	yes	yes	no	yes	1.08311	2.68752	Class I-2	0.458856	1.42527	0.226901	0.544805
YBR038W	CHS2	no	yes	no	no	-0.422245	-0.95488		-0.907174	-0.130313	0.0373474
YBR039W	ATP3	yes	yes	no	yes	0.194013	3.15701	Class II	1.66478	2.91294	0.508653	1.81718
YBR040W	FIG1	no	yes			0.048432	-0.984473		-6.01526	-4.25734	1.0184
YBR041W	FAT1	no	yes	no	no	-0.149753	-1.11225		-1.42378	-0.654119	0.0301469	-0.133708
YBR042C	CST26	no	yes	no	no	-0.061465	-0.622233		-1.36432	-0.663977	-0.0391682	-0.767554
YBR043C	QDR3	no	yes	no	no	-0.331047	-1.26232		0.434294	1.74804	0.574235	-1.4245
YBR044C	TCM62	yes	yes	yes	yes	2.0051	2.78729	Class I-2	0.215204	1.65124	0.696527	0.701194
YBR045C	GIP1	no	yes		no	-0.18374	-1.18079		2.65975	-3.59838	-6.99764
YBR046C	ZTA1	no	yes	no	no	0.0465683	-0.900271		2.40305	2.95084	-0.191723	1.58035
YBR047W	FMP23	no	yes		no	0.248416	-0.549534	Class II	3.22178	3.82292	-0.138377
YBR048W	RPS11B	no	yes	no	no	-0.229836	-0.654635		-1.52822	-0.598169	0.190533	-0.642362
YBR049C	REB1	no	yes	no	no	-0.490095	-0.900146		-0.988494	0.0359408	0.284921	0.0556618
YBR050C	REG2	no	yes			-0.00403331	-0.755462		2.25405	3.61303	0.619462
YBR051W	YBR051W	no	yes			#NAME?	0.387497		-1.62294	NA
YBR052C	RFS1	no	yes	no	no	-0.197341	-0.757667		-0.0960466	0.584396	-0.0590709	0.176859
YBR053C	YBR053C	no	yes	no	no	-0.0973693	-0.961576		-0.136787	0.72294	0.120213	0.547928
YBR054W	YRO2	no	yes	no	no	0.202016	-0.761646		1.1239	2.07682	0.213404	-1.49263
YBR055C	PRP6	no	yes	no	no	-0.154794	-0.991849		-0.935028	-0.376335	-0.180821	-0.115477
YBR056C-B	YBR056C-B	no	yes			#NAME?	-0.934431		-0.622938	-0.350448	-0.467023
YBR056W	YBR056W	no	yes	no	no	0.161415	-0.0624799		-0.199321	0.504736	-0.0354571	0.685034
YBR056W-A	YBR056W-A	no	yes		no	1.01055	-0.0831411		0.0360251	0.954407	0.178868
YBR057C	MUM2	no	yes	no	no	-0.128781	-0.714773		-0.419883	1.01534	0.695708	0.70112
YBR058C	UBP14	no	yes	no	no	-0.353771	-0.69976		-0.642411	0.242834	0.145731	0.366026
YBR058C-A	TSC3	no	yes	no	no	0.355077	-0.67034		-1.00961	0.2385	0.5086	-0.218202
YBR059C	AKL1	no	yes	no	no	-0.347941	-0.847898		-0.639693	-0.0693166	-0.169138	0.0696735
YBR060C	ORC2	no	yes	no	no	0.0480995	-0.58598		-0.600475	0.149459	0.0104207	-0.0995357
YBR061C	TRM7	no	yes	no	no	0.164001	-0.490316		-1.2214	-0.0265094	0.455375	0.0871047
YBR062C	YBR062C	no	yes	no	no	-0.16497	-0.760474		0.0093302	1.25571	0.506863	0.578449
YBR063C	YBR063C	no	yes			0.540286	-0.431931	Class III	-1.38013	-0.350448	0.290167
YBR065C	ECM2	no	yes	no	no	0.163535	-0.80346		-1.18806	-0.100019	0.348523	-0.659509
YBR066C	NRG2	no	yes	no	no	-0.15487	-0.351975		-1.51191	-0.288719	0.483674
YBR067C	TIP1	no	yes	no	no	0.284408	-0.46883		3.32166	4.05833	-0.00284741
YBR068C	BAP2	no	yes	no	no	-0.0920393	-0.997576		0.179937	1.27473	0.355279	0.814444
YBR069C	TAT1	no	yes	no	no	-0.141103	-0.699566	Class II	0.226755	0.638594	-0.327675	-1.35502
YBR070C	ALG14	no	yes	no	no	0.0669067	-0.469832		-0.516418	0.246547	0.0234515	-0.0415583
YBR071W	YBR071W	no	yes	no	no	-0.0852329	-0.702176		0.202925	1.31859	0.376149
YBR072C-A	YBR072C-A	no	yes			Inf	-0.72798		-2.03798	NA
YBR072W	HSP26	no	yes	no	no	1.2417	0.173836		4.52536	4.73992	-0.524951	4.38297
YBR073W	RDH54	no	yes	no	no	0.324843	0.0958309		-1.39086	-0.352435	0.298911	1.25415
YBR074W	YBR074W	no	yes	no	no	-0.267068	-1.03453		-1.01187	-0.35602	-0.0836683	-0.416714
YBR076C-A	YBR076C-A	no	yes		no	1.44075	-0.669534		-0.457879	NA
YBR076W	ECM8	no	yes			-1.78164	-0.799589		0.377062	2.45691	1.34033
YBR077C	SLM4	no	yes	no	no	0.182735	-0.604411		-0.417619	0.551418	0.229523	-0.125994
YBR078W	ECM33	no	yes	no	no	0.0783027	-0.597488	Class II	-0.965801	-0.0865433	0.139744	-0.242368
YBR079C	RPG1	no	yes	no	no	-0.370918	-0.938215		-1.22689	-0.255173	0.232199	-0.463494
YBR080C	SEC18	no	yes	no	no	0.262362	0.518399		-1.19591	-0.146624	0.309774	-0.24378
YBR081C	SPT7	no	yes	no	no	-0.710605	-1.24729		-0.63401	0.130417	0.0249138	0.19798
YBR082C	UBC4	no	yes	no	no	0.235017	-0.668785		-1.29654	0.120109	0.67714	-0.574181
YBR083W	TEC1	no	yes	no	no	-0.352982	-0.945551		-0.364363	1.20473	0.829577	1.05445
YBR084C-A	RPL19A	no	yes	no	no	-0.0938197	-0.495666		-1.49747	-0.588977	0.168975	-0.589659
YBR084W	MIS1	yes	yes	yes	yes	2.98027	3.82194	Class II	-2.01507	-0.855466	0.420089	0.00615538
YBR085C-A	YBR085C-A	no	yes	no	no	0.163501	-0.808898		1.02858	2.32219	0.554097	0.0536921
YBR085W	AAC3	yes	yes	yes	yes	1.34284	1.96717	Class III	-3.03798	-1.64743	0.651032
YBR086C	IST2	no	yes	no	no	0.140636	-0.902916		-1.18215	-0.075434	0.367205	0.0841551
YBR087W	RFC5	no	yes	no	no	-0.0590715	-0.41851		-0.940962	0.334901	0.536349	-0.249627
YBR088C	POL30	no	yes	no	no	-0.0203721	-0.743748		-0.92841	0.271064	0.459961	-0.00932261
YBR089C-A	NHP6B	no	yes	no	no	0.0472195	-0.512483		-0.416097	0.885735	0.562318	0.770073
YBR090C	YBR090C	no	yes	no	no	-0.00424555	-0.498151		-0.449374	0.896645	0.606506
YBR091C	TIM12	yes	yes	no	no	0.0915028	-0.249445	Class III	-0.957674	-0.157484	0.0606763	0.0809875
YBR092C	PHO3	no	yes	no	no	-0.124325	-0.439576		-3.19664	-1.82693	0.630197
YBR093C	PHO5	no	yes		no	-0.699178	-0.483517		-2.27982	-2.13388	-0.59358
YBR094W	PBY1	no	yes	no	no	-0.0438535	-0.822561		-0.734026	0.576585	0.571097	0.0663643
YBR095C	RXT2	no	yes	no	no	-0.0615724	-0.724729		-0.740633	0.450297	0.451416	0.278954
YBR096W	YBR096W	no	yes	no	no	-0.196433	-1.0007		-1.20233	-0.513733	-0.0509215	-0.338416
YBR097W	VPS15	no	yes	no	no	-0.110493	-0.308615		-0.530656	0.215796	0.00693809	0.169925
YBR098W	MMS4	no	yes	no	no	-0.324024	-1.00529		-0.434176	0.525681	0.220343
YBR101C	FES1	no	yes	no	no	0.0244525	-0.632852		-0.679954	0.362976	0.303417	0.0366038
YBR102C	EXO84	no	yes	no	no	-0.0738936	-0.957151		-0.957007	0.217177	0.43467	0.0864546
YBR103W	SIF2	no	yes	no	no	0.0124292	-0.763163		-0.596766	0.033997	-0.108751	0.438161
YBR104W	YMC2	yes	yes	no	yes	1.08224	2.03466	Class III	-3.51602	-2.37057	0.40594	-1.63743
YBR105C	VID24	no	yes	no	no	-0.378285	-0.356615		-0.969911	-0.480118	-0.249721
YBR106W	PHO88	no	yes	no	no	-0.172668	-0.464318	Class II	-1.52586	-0.655834	0.130508	-0.663777
YBR107C	IML3	no	yes		no	0.0729287	-0.874681		-0.506424	-0.167001	-0.400091
YBR108W	AIM3	no	yes	no	no	-0.223849	-0.975073		-0.253791	0.341336	-0.144387	0.277534
YBR109C	CMD1	no	yes	no	no	-0.0565884	-0.694155		-0.679433	0.626259	0.566178	-0.14721
YBR109W-A	YBR109W-A	no	yes		no	1.21836	-0.774092		-0.985508	-0.350448	-0.104453
YBR110W	ALG1	no	yes	no	no	0.100562	-0.75726		-0.518506	0.75593	0.534922	-0.151613
YBR111C	YSA1	no	yes	no	no	-0.194464	0.657044	Class III	-0.452687	0.311295	0.0244677	-0.0129259
YBR111W-A	SUS1	no	yes	no	no	-0.0108118	-0.661737		-0.354121	0.996178	0.610785	-0.0887289
YBR112C	CYC8	no	yes	no	no	-0.360193	-0.832334		-0.7141	0.015186	-0.0102276	0.0610885
YBR113W	YBR113W	no	yes				-0.80515			-1.35045
YBR114W	RAD16	no	yes	no	no	0.28321	-0.996096		-0.994497	-0.181471	0.0735118	-0.836501
YBR115C	LYS2	no	yes	no	no	-0.293008	-1.11222		-0.834028	-0.122962	-0.0284473	-1.05247
YBR116C	YBR116C	no	yes			1.70378	0.530455		1.87956	2.75808	0.139001
YBR117C	TKL2	no	yes		no	2.47075	0.634959		2.49571	2.241	-0.994221	2.749
YBR118W	TEF2	no	yes	no	no	-0.0356835	-1.06209		-1.17346	-0.294739	0.139207	-0.373694
YBR119W	MUD1	no	yes	no	no	-0.115149	-0.61424		-0.187916	1.12877	0.577168
YBR120C	CBP6	yes	yes	no	no	0.109425	0.910024	Class I-1	0.493427	1.60879	0.375849	0.824605
YBR121C	GRS1	yes	yes	no	no	0.234455	1.0657	Class II	-1.20444	-0.475359	-0.0104279	-0.357016
YBR121C-A	YBR121C-A	no	yes	no	no	-0.128199	1.54832		-1.1131	-0.588453	-0.214869
YBR122C	MRPL36	yes	yes	no	no	-0.151916	-0.186958	Class I-1	-0.296437	0.916619	0.473542	0.764045
YBR123C	TFC1	no	yes	no	no	0.02922	-0.374098		-0.843965	0.0674495	0.171901	-0.0665977
YBR125C	PTC4	no	yes	no	no	0.0980649	-0.0413464		-0.533486	0.193064	-0.0129631	0.249547
YBR126C	TPS1	no	yes	no	no	-0.137876	-0.69204		0.0124217	0.294346	-0.457589	0.808545
YBR126W-A	YBR126W-A	no	yes	no	no	-0.112473	-0.578189		-1.18272	-0.741238	-0.298029	-0.58954
YBR126W-B	YBR126W-B	no	yes	no	no	-0.0933775	-0.408481		-1.10428	-0.678089	-0.313324
YBR127C	VMA2	no	yes	no	no	-0.191897	-0.735551		-1.11635	-0.493309	-0.116477	-0.439406
YBR128C	ATG14	no	yes		no	0.803321	-0.598455		0.353978	1.15544	0.0619513
YBR129C	OPY1	no	yes	no	no	-0.14861	-0.356623		-0.730094	0.695932	0.686513	0.413827
YBR130C	SHE3	no	yes	no	no	-0.369776	-0.611769		-1.75392	-0.693915	0.320495	-0.955042
YBR131W	CCZ1	no	yes	no	no	0.188975	-1.00227		-1.02128	-0.187442	0.0943235
YBR132C	AGP2	no	yes	no	no	0.0109413	-0.849963		1.55452	2.2953	0.00126968	-0.319177
YBR133C	HSL7	no	yes	no	no	0.104111	-0.480973		-1.17371	-0.337737	0.0964554	-0.505424
YBR134W	YBR134W	no	yes				0.194853			NA
YBR135W	CKS1	no	yes	no	no	0.253218	-0.43683		-0.820978	0.0412767	0.122741	0.65099
YBR136W	MEC1	no	yes	no	no	-0.308972	-1.3102	Class III	-0.402649	0.266085	-0.0707798	0.169925
YBR137W	YBR137W	no	yes	no	no	0.0251493	-0.678424		0.0437209	0.534425	-0.248809	0.348549
YBR138C	YBR138C	no	yes	no	no	-0.183935	-0.806881		-0.682439	0.9202	0.863125
YBR139W	YBR139W	no	yes	no	no	0.075216	-0.818448		-0.0582898	0.842506	0.161282	0.900275
YBR140C	IRA1	no	yes	no	no	-0.328698	-1.2559		-0.146823	0.892123	0.299432	1.18322
YBR141C	YBR141C	no	yes		no	0.501089	-0.593394		-1.47298	-0.672376	0.0610861
YBR141W-A	YBR141W-A	no	yes		no	-0.267068	-0.688452		1.25153	NA
YBR142W	MAK5	no	yes	no	no	0.139016	-0.32988		-2.00204	-0.737471	0.525059	-0.539366
YBR143C	SUP45	no	yes	no	no	-0.0982927	-0.271617		-1.36111	-0.24917	0.372424	-0.460681
YBR144C	YBR144C	no	yes				-1.6125		-0.622938	NA
YBR145W	ADH5	no	yes	no	no	-0.0358244	-0.747404		-0.55634	0.137346	-0.0458272	0.0569285
YBR146W	MRPS9	yes	yes	no	yes	0.720172	2.39371	Class I-2	-0.40822	0.750662	0.419368	0.889144
YBR147W	RTC2	no	yes		no	0.694279	-1.16008		3.45031	3.86798	-0.321849
YBR148W	YSW1	no	yes		no	-0.802105	-0.541342		0.0848812	-1.21294	-2.03734
YBR149W	ARA1	no	yes	no	no	-0.00157124	-0.375432		0.745739	1.47296	-0.0122919	1.07674
YBR150C	TBS1	no	yes	no	no	-0.0724203	-0.137537		0.127515	1.16963	0.302597	-0.103093
YBR151W	APD1	no	yes	no	no	0.0177581	-0.573869		-0.648759	0.332908	0.242153	-0.0311837
YBR152W	SPP381	no	yes	no	no	-0.203733	-0.502879		-0.892545	0.685773	0.838804
YBR153W	RIB7	no	yes	no	no	0.105591	-0.348036		-0.341707	1.0828	0.68499
YBR154C	RPB5	no	yes	no	no	-0.0824331	-0.580244		-1.27736	-0.00879236	0.529051	-0.366186
YBR155W	CNS1	no	yes	no	no	-0.303277	-0.158785		-1.92909	-0.958172	0.231399	-0.596985
YBR156C	SLI15	no	yes	no	no	-0.189017	-0.667966		-1.26915	0.0719319	0.60157
YBR157C	ICS2	no	yes	no	no	0.0216672	-0.850251		1.6363	2.50695	0.131129	2.43911
YBR158W	AMN1	no	yes	no	no	-0.0687824	-0.406052		-1.01947	-0.324469	-0.0445157
YBR159W	IFA38	no	yes	no	no	-0.113864	-0.971009		-0.91065	0.142562	0.313699	-0.0901775
YBR160W	CDC28	no	yes	no	no	0.00377588	-0.513578		-0.856863	0.0132808	0.13063	0.136582
YBR161W	CSH1	no	yes	no	no	-0.112239	-0.920504		-1.47407	-1.0198	-0.285241
YBR162C	TOS1	no	yes	no	no	0.0583692	-0.449458		-1.11786	-0.536223	-0.157874	0.269601
YBR162W-A	YSY6	no	yes	no	no	0.152471	-0.572223		-1.2386	-0.26697	0.232114
YBR163W	EXO5	yes	yes	no	yes	0.979987	1.59236	Class II	-1.14388	0.405014	0.809385
YBR164C	ARL1	no	yes	no	no	-0.195149	-0.719758		-1.17933	-0.265805	0.174013	-0.229964
YBR165W	UBS1	no	yes	no	no	-0.0897632	-0.625817		-0.684102	0.135849	0.0804368
YBR166C	TYR1	no	yes	no	no	-0.0809983	0.146669		-1.34005	-0.213178	0.387362	-0.258082
YBR167C	POP7	yes	yes	no	no	-0.1721	-0.556578		-0.783403	0.290224	0.334113	-0.542102
YBR168W	PEX32	no	yes	no	no	-0.240006	-1.07234		-0.16155	1.3135	0.73554
YBR169C	SSE2	no	yes	no	no	0.358381	0.0591343		0.695361	1.35319	-0.0816845	0.946103
YBR170C	NPL4	no	yes	no	no	-0.218611	-0.847354		-0.907258	0.141994	0.309739	-0.331353
YBR171W	SEC66	no	yes	no	no	0.0246621	-0.770178		-1.25294	-0.378446	0.134981	-0.696945
YBR172C	SMY2	no	yes	no	no	-0.104862	-0.70431		-0.378649	0.847334	0.486469	-0.477141
YBR173C	UMP1	no	yes	no	no	0.0165623	-0.716356		-0.535475	0.640546	0.436508	0.342687
YBR174C	YBR174C	no	yes				-1.6125		0.377062	NA
YBR175W	SWD3	no	yes	no	no	-0.0860064	-0.612503		-1.30679	-0.618483	-0.0512041	-0.549339
YBR176W	ECM31	no	yes	no	yes	0.429156	1.69015	Class II	-0.805052	0.238086	0.303625	0.292345
YBR177C	EHT1	no	yes	no	no	0.18915	0.555888	Class III	-0.84695	0.552745	0.660181	-0.691936
YBR178W	YBR178W	no	yes			3.54028	-1.09793		-0.622938	0.234515	0.117939
YBR179C	FZO1	yes	yes	no	no	-0.151081	0.0982197	Class III	0.093269	1.16051	0.327732	-0.436603
YBR180W	DTR1	no	yes			-1.10358	-0.659811			-0.350448
YBR181C	RPS6B	no	yes	no	no	-0.286475	-0.326494		-1.59785	-0.859089	-0.000748344	-0.608716
YBR182C	SMP1	no	yes		no	-0.0129663	-0.700219		-0.639426	1.20537	1.10528
YBR182C-A	YBR182C-A	no	yes			2.21836	-0.545389		-0.885972	-0.350448	-0.203989
YBR183W	YPC1	no	yes	no	no	-0.235863	-0.91945		-0.0308461	0.230678	-0.47799
YBR184W	YBR184W	no	yes		no	0.36421	0.4514		-1.07274	-0.53102	-0.197793
YBR185C	MBA1	yes	yes	yes	yes	1.70234	2.75358	Class I-2	0.309205	2.17569	1.12698	1.10236
YBR186W	PCH2	no	yes			-0.19668	-0.787		2.86249	3.10898	-0.493018
YBR187W	GDT1	no	yes	no	no	0.000446173	-0.588409		-1.84941	-1.10773	0.00216655	-1.07039
YBR188C	NTC20	no	yes	no	no	0.0391902	-0.712979		-0.155332	0.953266	0.369085	-0.0630404
YBR189W	RPS9B	no	yes	no	no	-0.276223	-0.58791		-1.66927	-0.678896	0.250858	-0.69787
YBR190W	YBR190W	no	yes		no	-0.881176	-1.35527		-1.42745	-0.765485	-0.0775514
YBR191W	RPL21A	no	yes	no	no	-0.200544	-0.424051		-1.54404	-0.428398	0.376132	-0.540723
YBR191W-A	YBR191W-A	no	yes			-2.10357	-1.6125		-1.70715	-0.350448	0.617185
YBR192W	RIM2	yes	yes	yes	yes	1.26791	1.84754	Class I-2	-0.881943	-0.294491	-0.152062	0.138976
YBR193C	MED8	no	yes	no	no	0.344468	-0.602962		-0.700941	0.573552	0.534979	-0.169925
YBR194W	AIM4	no	yes	no	no	-0.0208286	-0.808794		-0.0711424	0.779433	0.111061
YBR195C	MSI1	no	yes	no	no	0.00880893	-0.731887		-1.17363	-0.321079	0.113038	-0.195417
YBR196C	PGI1	yes	yes	no	no	-0.0489788	-0.232202		-0.863508	-0.0789221	0.0450726	-0.0483645
YBR196C-A	YBR196C-A	no	yes				-3.78243		-0.829389	NA
YBR197C	YBR197C	no	yes	no	no	0.022572	-0.448746		-0.703769	0.0975501	0.0618055	0.113458
YBR198C	TAF5	no	yes	no	no	-0.10119	-0.552974		-1.17566	-0.180283	0.255864	-0.138531
YBR199W	KTR4	no	yes	no	no	0.0297049	-0.761929		-0.591328	0.221472	0.0732866	-0.360481
YBR200W	BEM1	no	yes	no	no	-0.27033	-0.800698		-0.231251	0.668844	0.160581	-0.0676868
YBR201C-A	YBR201C-A	no	yes		no	0.278065	-0.473527		0.093269	1.88659	1.05381
YBR201W	DER1	no	yes	no	no	0.160256	-0.698297		-0.395132	0.0409773	-0.303404
YBR202W	MCM7	no	yes	no	no	-0.0448216	0.167468		-0.550673	0.0327112	-0.15613	-0.329436
YBR203W	COS111	no	yes	no	no	-0.202779	-0.682755		2.14689	2.98165	0.0952396
YBR204C	YBR204C	no	yes	no	no	-0.145296	-0.869871		-0.198623	0.909196	0.368305	0.168155
YBR205W	KTR3	no	yes	no	no	-0.0264785	-0.61356		-0.837128	0.0182318	0.115846	-0.130563
YBR206W	YBR206W	no	yes	no	no	0.157718	-0.8089		-0.796618	0.106856	0.16396
YBR207W	FTH1	no	yes	no	no	0.173372	-0.654412		-0.137207	0.628479	0.0261725	-0.169925
YBR208C	DUR1,2	no	yes	no	no	-0.361316	-0.841944	Class III	-0.619517	-0.668027	-0.788024	-0.767706
YBR210W	ERV15	no	yes	no	no	0.201551	-0.602655		-1.2612	0.470582	0.992267
YBR211C	AME1	no	yes	no	no	-0.0987033	-0.733202		-0.367477	0.261847	-0.11019	-0.31366
YBR212W	NGR1	no	yes	no	no	-0.0406249	-0.71496		0.357783	1.23061	0.133311	0.805536
YBR213W	MET8	no	yes	no	no	0.520629	-0.448702		-0.800178	0.132761	0.193426	-1.44222
YBR214W	SDS24	no	yes	no	no	0.15005	-0.780329		1.04215	1.32944	-0.452224	1.16442
YBR215W	HPC2	no	yes	no	no	0.0165037	-0.867301		-0.693734	0.283702	0.237923	0.117836
YBR216C	YBP1	no	yes	no	no	-0.50696	-1.00385		-0.56764	0.127044	-0.04483	0.340159
YBR217W	ATG12	no	yes		no	-1.05083	-0.876503		-0.807363	1.17848	1.24633
YBR218C	PYC2	no	yes	no	no	-0.0889417	-0.612986		-0.118067	0.567735	-0.0537114	-0.177594
YBR219C	YBR219C	no	yes			0.404772	-1.20766		-0.810308	0.20898	0.279774
YBR220C	YBR220C	no	yes	no	no	0.218359	-0.772055		-0.715604	-0.124595	-0.148505	-0.0962153
YBR221C	PDB1	yes	yes	no	yes	0.613362	3.14359	Class I-2	-0.196609	0.477102	-0.0658024	-0.0429614
YBR222C	PCS60	no	yes	no	no	-0.0369574	-0.472367		2.1347	2.37703	-0.497186	1.81391
YBR223C	TDP1	no	yes	no	no	0.218359	-0.709179		0.181565	1.21812	0.297042	-0.0565835
YBR224W	YBR224W	no	yes		no	-0.781642	-1.18127		1.20018	NA
YBR225W	YBR225W	no	yes	no	no	-0.0174305	-0.138006		0.0613748	1.02587	0.224979	0.459432
YBR226C	YBR226C	no	yes			#NAME?	-0.934432		0.624989	NA
YBR227C	MCX1	yes	yes	yes	yes	1.80461	3.01915	Class II	-0.914278	-0.398514	-0.22375	-0.0311783
YBR228W	SLX1	no	yes	no	no	0.0452945	-0.574511		-0.263857	0.449615	-0.0260419
YBR229C	ROT2	no	yes	no	no	0.023968	-0.746065		-0.487172	0.178843	-0.0734983	-0.0806607
YBR230C	OM14	no	yes	no	no	0.025714	-0.735244	Class III	2.82117	3.48406	-0.0766253	2.72434
YBR230W-A	YBR230W-A	no	yes	no	no	-0.142869	-0.634958		0.935057	1.61389	-0.0606846
YBR231C	SWC5	no	yes	no	no	-0.158204	-0.885942		-0.949439	-0.180318	0.0296073
YBR232C	YBR232C	no	yes				0.12446			NA
YBR233W	PBP2	no	yes	no	no	0.0345265	-0.915844		-0.659332	0.241636	0.161455	-0.755086
YBR233W-A	DAD3	no	yes	no	no	-0.557866	-0.634917		-0.799261	-0.0474367	0.0123104	0.0532834
YBR234C	ARC40	no	yes	no	no	-0.0204351	-0.784704		-0.780751	0.394693	0.43593	0.746967
YBR235W	YBR235W	no	yes	no	no	-0.00220827	-0.901517		-0.918545	-0.0175787	0.161452
YBR236C	ABD1	no	yes	no	no	-0.235292	-0.464609		-0.887255	0.193818	0.34156	-0.447033
YBR237W	PRP5	no	yes	no	no	-0.563536	-0.765807		-0.730295	-0.101219	-0.110437	0.58724
YBR238C	YBR238C	no	yes	no	no	0.171484	-0.199992		-2.80226	-1.1578	0.904945	-0.303907
YBR239C	ERT1	no	yes	no	no	-0.0929998	-0.324432		-0.954614	0.411609	0.626709
YBR240C	THI2	no	yes		no	0.218359	-0.389226		1.32261	2.2159	0.153771
YBR241C	YBR241C	no	yes	no	no	0.157696	-0.835058		1.32808	1.85833	-0.209265	1.19709
YBR242W	YBR242W	no	yes	no	no	-0.0033484	-0.561975		-1.61465	-0.75212	0.123021	-1.43487
YBR243C	ALG7	no	yes	no	no	-0.0416665	-0.946404		-0.840885	0.0450021	0.146373
YBR244W	GPX2	no	yes	no	no	-0.166645	-0.925755		-3.30366	-2.39496	0.169182	-1.3952
YBR245C	ISW1	no	yes	no	no	-0.243713	-0.781307		-1.31999	-0.385325	0.195155	-0.288262
YBR246W	RRT2	no	yes	no	no	-0.0271378	-1.01808		-0.928175	-0.143156	0.0455055	-0.697377
YBR247C	ENP1	no	yes	no	no	-0.0170189	-0.442784		-2.04389	-0.91622	0.388156	-0.282062
YBR248C	HIS7	no	yes	no	no	-0.130525	-0.707626		-1.23426	-0.298826	0.195917	-0.373895
YBR249C	ARO4	no	yes	no	no	-0.0240834	-0.616004		-0.639626	0.252636	0.152748	-0.136388
YBR250W	SPO23	no	yes		no	-2.00403	-1.11149		-0.879278	-0.765485	-0.625721
YBR251W	MRPS5	yes	yes	no	no	-0.124865	0.928694	Class I-1	-0.0886844	1.60559	0.954763	0.76435
YBR252W	DUT1	no	yes	no	no	0.118604	-0.36018		-1.40447	-0.363755	0.301201	-0.606186
YBR253W	SRB6	no	yes	no	no	-0.451216	-0.718501		-0.546317	0.178481	-0.0147161	-0.0712913
YBR254C	TRS20	no	yes	no	no	-0.0420306	-0.599145		-1.21904	-0.233232	0.246295	-0.0390998
YBR255C-A	YBR255C-A	no	yes	no	no	-0.239564	-0.309205		1.04982	2.59619	0.806855	1.50725
YBR255W	MTC4	no	yes	no	no	0.0850928	-0.291951		-0.26103	0.775083	0.2966	0.387023
YBR256C	RIB5	no	yes	no	no	-0.149066	-0.938545		-0.425401	0.925621	0.611509	0.356628
YBR257W	POP4	yes	yes	no	no	-6.44604e-05	-0.546026		-1.05301	-0.0444171	0.269084
YBR258C	SHG1	no	yes	no	no	-0.444606	-0.810884		-1.4043	0.338351	1.00313
YBR259W	YBR259W	no	yes		no	0.121062	-0.83404		-0.826996	0.657635	0.745117
YBR260C	RGD1	no	yes	no	no	-0.265507	-0.451733		-0.752684	0.32093	0.3341	-0.0881309
YBR261C	TAE1	no	yes	no	no	0.0837969	-0.404243		-1.42917	-0.673119	0.0165334	-0.328236
YBR262C	AIM5	no	yes	no	no	0.154759	-0.343479	Class III	0.951756	1.60787	-0.0834033	0.955887
YBR263W	SHM1	yes	yes	yes	yes	1.45912	3.16718	Class II	-0.585172	0.223878	0.0695358	0.21181
YBR264C	YPT10	no	yes	no	no	-0.0912757	-0.641958		-0.919713	-0.518529	-0.33833	-0.329921
YBR265W	TSC10	no	yes	no	no	-0.124551	-0.735819		-0.6688	-0.14038	-0.211094	-0.597131
YBR266C	SLM6	no	yes				-0.612488			NA
YBR267W	REI1	no	yes	no	no	-0.176704	-0.382947		-1.53457	-0.700956	0.094099	0.390952
YBR268W	MRPL37	yes	yes	no	no	0.270329	-0.363074	Class I-1	-0.552235	0.224355	0.0370764	0.604555
YBR269C	FMP21	no	yes	no	no	0.42516	1.28712	Class III	0.760391	2.09464	0.594733	1.66318
YBR270C	BIT2	no	yes		no	-0.118676	-0.181869		-0.622938	1.37538	1.2588
YBR271W	YBR271W	no	yes	no	no	0.0802829	-0.485241		-1.85998	-0.919711	0.200752
YBR272C	HSM3	no	yes	no	no	-0.625723	-1.06521		-0.84533	0.0910395	0.196856	-0.0275463
YBR273C	UBX7	no	yes	no	no	-0.12706	-0.735746		-0.634526	0.179999	0.0750112	0.593901
YBR274W	CHK1	no	yes	no	no	-0.420184	-0.843116		-1.17699	0.346288	0.783769
YBR275C	RIF1	no	yes	no	no	-0.536439	-1.28017		-1.017	-0.296284	-0.0187978	0.192645
YBR276C	PPS1	no	yes	no	no	0.12955	-0.590307		-0.862044	0.607324	0.729854	1.09954
YBR277C	YBR277C	no	yes				-0.612504		-0.622938	NA
YBR278W	DPB3	no	yes	no	no	0.213045	-0.847941		-0.728387	-0.000505142	-0.0116315	-0.467632
YBR279W	PAF1	no	yes	no	no	-0.333739	-0.645941		-0.80665	-0.040076	0.0270603	0.202774
YBR280C	SAF1	no	yes	no	no	0.316127	1.35163		0.492055	1.38707	0.155505	0.589891
YBR281C	DUG2	no	yes	no	no	-0.11843	-1.02259		-1.13684	-0.443042	-0.0457153	-0.122426
YBR282W	MRPL27	yes	yes	no	no	0.200126	-0.719418	Class III	-0.452385	1.33737	1.05024	0.762104
YBR283C	SSH1	no	yes	no	no	-0.0990803	-0.882789		-1.21707	-0.508386	-0.0308267	-0.416722
YBR284W	YBR284W	no	yes	no	no	0.257178	-0.276022		-0.177527	1.26253	0.700542
YBR285W	YBR285W	no	yes	no	no	0.491378	-0.383021		4.39943	3.76725	-1.3717	-0.128324
YBR286W	APE3	no	yes	no	no	0.0961056	-0.55624		-0.507376	-0.072249	-0.304387	0.219278
YBR287W	YBR287W	no	yes	no	no	-0.325995	-0.868332		-0.672483	-0.243329	-0.310359	-0.705066
YBR288C	APM3	no	yes	no	no	-0.207162	-0.802448		-1.21269	0.0146465	0.487818	-0.615758
YBR289W	SNF5	no	yes	no	no	0.32712	0.389756		-0.491775	0.555978	0.30824	-0.21874
YBR290W	BSD2	no	yes	no	no	-0.279252	-0.679564		-0.34231	0.902533	0.505329
YBR291C	CTP1	yes	yes	no	no	0.56864	0.833675	Class III	-0.415045	0.203072	-0.121397	-2.50455
YBR292C	YBR292C	no	yes				-1.19747		0.65717	NA
YBR293W	VBA2	no	yes		no	0.0808558	-0.632199		-0.627411	1.18561	1.0735
YBR294W	SUL1	no	yes		no	-0.540633	-1.11561		4.04382	5.10241	0.319079
YBR295W	PCA1	no	yes	no	no	0.0821547	-0.316216		-0.344819	0.106597	-0.288097
YBR296C	PHO89	no	yes			0.715859	-0.406052		0.824521	1.34223	-0.221806
YBR297W	MAL33	no	yes		no	-0.110948	-0.707066		3.14804	3.53294	-0.354614
YBR298C	MAL31	no	yes			2.54029	-2.19747		0.716504	0.234515	-1.2215
YBR299W	MAL32	no	yes			#NAME?	-0.442581		1.16848	3.92184	2.01385	1.47048
YBR301W	PAU24	no	yes			2.21836	1.97246		-1.02348	-0.93541	-0.651448
YCL001W	RER1	no	yes	no	no	0.0202988	-0.818077		-0.668742	0.725918	0.655146	0.220645
YCL002C	YCL002C	no	yes	no	no	0.271798	-0.782428		-1.26369	0.141949	0.666123
YCL004W	PGS1	yes	yes	yes	yes	2.09391	2.35014	Class I-2	0.0895745	0.847492	0.0184035
YCL005W	LDB16	no	yes	no	no	0.0404412	-0.306424		-0.996396	-0.17266	0.0842222
YCL005W-A	VMA9	no	yes	no	no	0.0884722	-0.373582		-0.986737	-0.035121	0.212102	-0.338514
YCL007C	YCL007C	no	yes			0.218355	-1.41986		-2.2079	NA
YCL008C	STP22	no	yes	no	no	0.207613	-0.590975		-0.480334	0.484856	0.225676	0.044577
YCL009C	ILV6	yes	yes	no	yes	0.302553	2.31861	Class III	-0.320392	0.602035	0.182913	-0.143648
YCL010C	SGF29	no	yes	no	no	-0.329329	-0.566998		-0.780839	-0.30656	-0.265235	-0.662965
YCL011C	GBP2	no	yes	no	no	-0.412407	-0.819926		-1.32572	-0.645001	-0.0587919	-0.518385
YCL012C	YCL012C	no	yes	no	no	-0.022649	-0.612503		-0.297843	1.06297	0.621301	0.422867
YCL014W	BUD3	no	yes	no	no	-0.34472	-1.18535	Class II	-0.973311	-0.406742	-0.172944	-1.37656
YCL016C	DCC1	no	yes	no	no	0.00536535	-0.741927		-0.559576	0.460228	0.28029	-0.133856
YCL017C	NFS1	yes	yes	yes	yes	1.50187	3.55093	Class II	-0.637319	0.359041	0.256846	0.231716
YCL021W-A	YCL021W-A	no	yes			0.21836	-0.644924		-0.375778	-0.350448	-0.714184
YCL024W	KCC4	no	yes	no	no	-0.15715	-0.772347		-0.641532	0.649552	0.551571	-0.454566
YCL025C	AGP1	no	yes	no	no	-0.326273	-1.04315		1.18584	1.90314	-0.0222144	-0.419376
YCL026C-A	FRM2	no	yes			1.76268	-0.278084		-3.79286	-0.350448	2.7029
YCL026C-B	HBN1	no	yes	no	no	0.25416	-0.199502		0.570542	1.54458	0.234527	1.63768
YCL027W	FUS1	no	yes	no	no	-0.270301	-0.999796		-5.02715	-2.28863	1.99901
YCL028W	RNQ1	no	yes	no	no	-0.0882206	-0.573658		-0.341816	0.71704	0.319342	0.249503
YCL029C	BIK1	no	yes	no	no	0.656398	-0.0983619		-0.739289	-0.0360802	-0.0363051	0.931798
YCL030C	HIS4	no	yes	no	no	0.304816	0.485605		-3.15928	-3.05657	-0.636804	-1.02658
YCL031C	RRP7	no	yes	no	no	0.208971	-0.565038		-1.1379	0.218359	0.616743	-0.557396
YCL032W	STE50	no	yes	no	no	0.135184	-0.793316		-0.045171	0.628972	-0.0653712	1.67821
YCL033C	MXR2	no	yes	no	no	-0.103043	-0.166843		0.592522	0.932744	-0.399291	0.871979
YCL034W	LSB5	no	yes	no	no	-0.0853644	-0.529244		-0.442125	-0.245354	-0.542743	-0.136765
YCL035C	GRX1	no	yes	no	no	0.11053	-0.601525		0.231326	1.27736	0.306516	0.544504
YCL036W	GFD2	no	yes		no	0.596871	-0.694141		-1.68853	-0.837055	0.111958
YCL037C	SRO9	no	yes	no	no	-0.0708269	-0.535002		-1.68187	-0.575593	0.366759	-1.40583
YCL038C	ATG22	no	yes	no	no	-0.057877	-0.896576		0.0263335	0.672822	-0.093025	2.4021
YCL039W	GID7	no	yes	no	no	-0.251769	-0.85653		-0.0447647	0.869832	0.175083	0.471101
YCL040W	GLK1	no	yes	no	no	-0.0283881	-0.677637		1.98873	2.29349	-0.434754	1.82714
YCL041C	YCL041C	no	yes	no	no	0.238736	-0.612894		-1.05508	-0.512415	-0.196854
YCL042W	YCL042W	no	yes	no	no	-0.254485	-0.717533		1.97876	2.58082	-0.137455	-0.701705
YCL043C	PDI1	no	yes	no	no	0.0115208	-0.197384		-1.08512	-0.503995	-0.158384	-0.0863891
YCL044C	MGR1	yes	yes	yes	yes	1.79488	2.40621	Class II	-0.627114	0.412548	0.300148	0.210412
YCL045C	EMC1	no	yes	no	no	0.0691276	-0.442859		-1.17426	-0.181485	0.253263	-0.615839
YCL047C	YCL047C	no	yes	no	no	-0.234153	0.105641		-0.899383	-0.147233	0.0126364	-0.161155
YCL048W	SPS22	no	yes			1.80332	0.387497			0.386518
YCL048W-A	YCL048W-A	no	yes			1.44075	0.232522			4.14598
YCL049C	YCL049C	no	yes	no	no	0.390092	-0.131036		0.866646	2.26775	0.661591
YCL050C	APA1	no	yes	no	no	-0.118384	-0.492201		-1.77377	-0.569685	0.464574	-0.907053
YCL051W	LRE1	no	yes	no	no	-0.463971	-0.750503		-0.470614	0.647423	0.378523	-0.644905
YCL052C	PBN1	no	yes	no	no	-0.101122	-0.683537		-0.305656	0.408359	-0.0254984	0.0226945
YCL054W	SPB1	no	yes	no	no	-0.209564	-0.632132		-1.78018	-0.933038	0.10763	-0.51603
YCL055W	KAR4	no	yes	no	no	0.121919	-0.589342		-1.58731	-0.13518	0.712621
YCL056C	YCL056C	no	yes		no	-0.456241	-0.919271	Class III	-0.459999	1.23451	0.955001
YCL057C-A	YCL057C-A	no	yes	no	no	-0.0130343	-0.658021		1.10293	2.22107	0.378628	1.15478
YCL057W	PRD1	yes	yes	no	yes	1.09444	1.70715	Class II	-0.312442	0.568774	0.141703	0.126064
YCL058C	FYV5	no	yes			Inf	-1.15999		0.892173	2.55644	0.924756
YCL058W-A	ADF1	no	yes	no	no	0.473616	-0.371796		-0.958122	-1.10323	-0.884621
YCL059C	KRR1	no	yes	no	no	-0.246362	-0.318078		-1.75114	-0.676669	0.334954	-0.655194
YCL061C	MRC1	no	yes	no	no	-0.545121	-0.808874		-0.83342	-0.223735	-0.129829	-1.45372
YCL063W	VAC17	no	yes	no	no	-0.0882249	-0.649029		-0.960808	-0.0560003	0.165294
YCL064C	CHA1	yes	yes	yes	yes	1.60849	2.85206	Class II	-0.52871	0.735454	0.52465
YCR002C	CDC10	no	yes	no	no	0.0962972	-0.405786		-1.09899	-0.0139975	0.345478	-0.246768
YCR003W	MRPL32	yes	yes	yes	yes	1.29742	2.48816	Class I-1	-0.155812	1.37374	0.790038	-0.125801
YCR004C	YCP4	no	yes	no	no	-0.0653362	-0.629235		0.563259	1.31403	0.0112581	0.851868
YCR005C	CIT2	no	yes	no	no	0.0329466	-0.51322	Class II	0.694157	1.07469	-0.358985	0.0682463
YCR006C	YCR006C	no	yes				-1.41986		-0.00626666	NA
YCR007C	YCR007C	no	yes		no	-0.622943	-0.661285		0.514566	-0.350448	-1.60453
YCR008W	SAT4	no	yes	no	no	0.192328	-0.0463167		-0.424595	1.01035	0.695434	-0.710493
YCR009C	RVS161	no	yes	no	no	-0.14791	-0.745264		-1.07618	0.0847412	0.421409	-0.0886186
YCR010C	ADY2	no	yes		no	0.370362	-1.38069		5.73461	6.06194	-0.412192	4.00341
YCR011C	ADP1	no	yes	no	no	0.00211085	-1.04589		-0.429203	0.0469003	-0.26341	-0.181543
YCR012W	PGK1	yes	yes	no	no	-0.0693392	-0.254318		-1.11133	-0.51595	-0.144136	-0.0850216
YCR013C	YCR013C	no	yes			#NAME?	-1.79307		-1.62294	0.327624	1.21105
YCR014C	POL4	no	yes				-0.4605		0.0565151	2.10898	1.31296
YCR015C	YCR015C	no	yes	no	no	0.631467	0.375713		-0.107781	0.90777	0.276037	0.534777
YCR016W	YCR016W	no	yes	no	no	-0.0283626	-0.603308		-1.97734	-0.407887	0.829939	-0.916744
YCR017C	CWH43	no	yes	no	no	0.0190146	-1.03194		-0.385009	0.248959	-0.105546	0.020331
YCR018C	SRD1	no	yes	no	no	-0.202484	-0.572884		0.166074	0.960754	0.0551661
YCR018C-A	YCR018C-A	no	yes		no	-0.312156	-0.680248		-0.795633	1.14432	1.20044
YCR019W	MAK32	no	yes	no	no	0.00799925	-0.834895		-0.747329	-0.110353	-0.102538	-0.0840643
YCR020C	PET18	no	yes		no	0.860807	-0.333121		-0.196123	1.30163	0.758239
YCR020C-A	MAK31	no	yes	no	no	-0.00850679	-0.693522		-0.409159	0.889128	0.558773
YCR020W-B	HTL1	no	yes	no	no	0.181678	-0.831364		-0.488921	0.158917	-0.0916757	-0.27957
YCR021C	HSP30	no	yes			0.835889	-0.122452		3.80448	2.74788	-1.79611	-0.0489096
YCR022C	YCR022C	no	yes			#NAME?	-0.0719342		-1.84533	NA
YCR023C	YCR023C	no	yes	no	no	-0.143548	-1.02902		0.0962248	1.38281	0.547076	-0.0931094
YCR024C	SLM5	yes	yes	no	yes	1.10018	1.72306	Class I-2	-0.0565115	1.26028	0.577276	0.968151
YCR024C-A	PMP1	no	yes	no	no	-0.163434	-0.846262		-0.929307	0.470636	0.660429
YCR024C-B	YCR024C-B	no	yes			-0.366601	-1.48697		-0.944669	0.386518	0.591673
YCR025C	YCR025C	no	yes				-1.19747		0.338588	NA
YCR026C	NPP1	no	yes	no	no	0.455048	-0.714284		-0.470614	0.528884	0.259984	0.42862
YCR027C	RHB1	no	yes	no	no	-0.147883	-0.617486		-0.842719	0.223788	0.326994	-0.33776
YCR028C	FEN2	no	yes	no	no	0.0961873	-0.743087		-0.599921	-0.00998824	-0.149581
YCR028C-A	RIM1	yes	yes	no	no	0.0559835	-0.294911	Class III	-0.12905	0.990757	0.380293	0.755739
YCR030C	SYP1	no	yes	no	no	-0.273151	-1.18066		-0.346037	0.19998	-0.193497	0.335056
YCR031C	RPS14A	no	yes	no	no	-0.158859	-0.445766		-1.53545	-0.847763	-0.0518237
YCR032W	BPH1	no	yes	no	no	-0.556803	-0.993429		-0.430293	0.777694	0.468474
YCR033W	SNT1	no	yes	no	no	0.420871	-0.129517		-0.337002	0.754369	0.351857	0.436952
YCR034W	FEN1	no	yes	no	no	-0.093045	-0.892268		-1.23299	-0.460224	0.0332541	-0.761176
YCR035C	RRP43	no	yes	no	no	-0.309611	-0.796497		-1.54473	-0.633237	0.171983	-0.228497
YCR036W	RBK1	no	yes	no	no	-0.0351943	-0.636571		-0.306558	0.408904	-0.0240521	-0.0619162
YCR037C	PHO87	no	yes	no	no	0.180237	-0.523396		-0.815852	0.363496	0.439834	-0.545968
YCR038C	BUD5	no	yes		no	0.0702602	-1.01539		-0.173631	0.649552	0.0836693
YCR038W-A	YCR038W-A	no	yes			#NAME?	0.387497			NA
YCR042C	TAF2	no	yes	no	no	-0.320467	-1.09781		-0.768644	-0.211824	-0.182693	-0.221442
YCR043C	YCR043C	no	yes	no	no	0.10482	-0.530635		-2.31668	-0.476417	1.10075	-0.142923
YCR044C	PER1	no	yes	no	no	-0.226935	-0.672423		-1.02041	-0.192906	0.0879873
YCR045C	RRT12	no	yes			-1.36661	0.451629		0.377062	NA
YCR046C	IMG1	yes	yes	no	no	-0.00293077	0.287063	Class I-1	-0.399744	0.930352	0.590582	-1.46006
YCR047C	BUD23	no	yes	no	no	0.0146458	-0.198211		-1.6979	-1.35969	-0.401303	-0.204767
YCR047W-A	YCR047W-A	no	yes				0.387498			NA
YCR048W	ARE1	no	yes	no	no	0.237491	-0.337184		-1.52361	-1.41735	-0.633251	-0.422455
YCR051W	YCR051W	no	yes	no	no	-0.0523903	-0.310522		-0.767328	-0.0171533	0.010661	-0.0120113
YCR052W	RSC6	no	yes	no	no	-0.132062	-0.723008		-1.205	-0.56124	-0.0957566	-0.335008
YCR053W	THR4	no	yes	no	no	-0.0591841	-0.696729	Class III	-1.29331	-0.47051	0.0832904	-0.467202
YCR054C	CTR86	no	yes	no	no	-0.0722585	-0.89518		-1.16891	0.0168819	0.446275	-0.321928
YCR057C	PWP2	no	yes	no	no	-0.182592	-0.431198		-1.87746	-1.01848	0.119465	-0.541206
YCR059C	YIH1	no	yes	no	no	0.0942687	-0.302163		-0.799816	-0.112829	-0.0525266	-0.186096
YCR060W	TAH1	no	yes	no	no	0.189114	-0.520803		-0.978033	-0.210143	0.0283763	-0.493116
YCR061W	YCR061W	no	yes	no	no	0.194359	-0.672072		-0.85758	-0.669358	-0.551291	-2.66297
YCR063W	BUD31	no	yes	no	no	0.198181	-0.474512		-0.459052	0.857494	0.577032	-0.071161
YCR064C	YCR064C	no	yes			-0.366604	-0.435625		-0.540476	0.234515	0.0354771
YCR065W	HCM1	no	yes	no	no	-0.223661	-0.346298		-0.920117	-0.442776	-0.262174
YCR066W	RAD18	no	yes	no	no	-0.106808	-0.481258		-0.432507	0.432115	0.125109
YCR067C	SED4	no	yes	no	no	-0.0386587	-0.674229		-0.951125	-0.109172	0.102439	0.207392
YCR068W	ATG15	no	yes	no	no	-0.0703826	-0.664243		0.4849	0.395276	-0.829138	0.421827
YCR069W	CPR4	no	yes	no	no	0.37661	-0.16611		-0.198185	0.459937	-0.081391
YCR071C	IMG2	yes	yes	no	no	0.030479	-0.384544	Class I-1	-0.149686	1.51559	0.925766	0.553833
YCR072C	RSA4	no	yes	no	no	0.236506	-0.837494		-1.69248	-1.21692	-0.263951	-0.493225
YCR073C	SSK22	no	yes		no	0.408462	0.534338		-0.756521	1.40444	1.42145
YCR073W-A	SOL2	no	yes	no	no	0.0698684	-0.426377		-0.0675353	0.682155	0.0101762	0.635879
YCR075C	ERS1	no	yes	no	no	-0.216044	-0.590317		-0.306266	0.251291	-0.181957
YCR075W-A	YCR075W-A	no	yes	no	no	-0.188816	-0.740066		-0.757239	0.749619	0.767345	-0.222223
YCR076C	YCR076C	no	yes	no	no	-0.237838	-0.605448		-0.0468264	0.841932	0.149245	0.734903
YCR077C	PAT1	no	yes	no	no	-0.303868	-0.788724		-0.863535	-0.112234	0.0117875	-0.123685
YCR079W	PTC6	no	yes	no	yes	1.08123	1.60108		0.654743	0.830125	-0.564132	-0.0116818
YCR081W	SRB8	no	yes	no	no	-0.0586658	-0.974531		-0.523732	0.31391	0.0981286
YCR082W	AHC2	no	yes	no	no	0.00611941	-0.49517		-0.0566201	1.22365	0.54076
YCR083W	TRX3	yes	yes	no	no	0.390577	-0.0113447	Class III	0.529065	1.51476	0.246177	1.59326
YCR084C	TUP1	no	yes	no	no	-0.0571692	-0.814481		-1.13597	-0.458146	-0.0616883	-0.214932
YCR085W	YCR085W	no	yes				0.206924		-2.03798	NA
YCR086W	CSM1	no	yes	no	no	0.100433	-0.641148		-0.632337	0.666853	0.559676	-0.237892
YCR087C-A	YCR087C-A	no	yes	no	no	0.231565	-0.152801		-1.48648	-0.874424	-0.127462	-0.913372
YCR087W	YCR087W	no	yes				-1.6125		-1.3599	0.649552	1.26994
YCR088W	ABP1	no	yes	no	no	-0.255917	-0.748442		-0.480524	0.132867	-0.126122	0.150089
YCR089W	FIG2	no	yes		no	0.0361554	-1.04937		-1.30563	-3.67718	-3.11106
YCR090C	YCR090C	no	yes	no	no	-0.233102	-0.712422		-1.31421	-0.0323718	0.542324	-0.241408
YCR091W	KIN82	no	yes	no	no	0.113865	-0.0495668		1.15072	3.21677	1.32654
YCR092C	MSH3	no	yes	no	no	-0.270679	-1.01554		-1.07523	-0.233172	0.102541	-0.0671142
YCR093W	CDC39	no	yes	no	no	-0.499661	-1.23089		-0.77014	-0.0218044	0.0088222	0.0906983
YCR094W	CDC50	no	yes	no	no	0.210056	-0.501867		-0.916521	0.0444712	0.221479	-0.357552
YCR095C	OCA4	no	yes	no	no	0.0841738	-0.521064		-1.37175	-0.194497	0.437742	0.1453
YCR095W-A	YCR095W-A	no	yes				-3.41986		-0.453013	NA
YCR097W	HMRA1	no	yes	no	no	-0.019742	-0.807874		0.508633	1.66807	0.419926
YCR098C	GIT1	no	yes			0.732932	-0.0343298		-1.95854	0.456907	1.67593
YCR099C	YCR099C	no	yes				0.387508	Class II	-1.31683	NA
YCR101C	YCR101C	no	yes		no	0.359222	-0.904419		-0.434493	1.74909	1.44407
YCR102C	YCR102C	no	yes			-0.0446758	0.446389		-2.01526	1.31698	2.59272	0.393619
YCR105W	ADH7	no	yes		no	-0.78164	-0.483605		-0.760442	0.92966	0.950588
YCR106W	RDS1	no	yes		no	0.112565	-0.88169		-0.912182	0.335444	0.508112
YDL001W	RMD1	no	yes	no	no	-0.0825949	-0.757626		-0.696716	0.463997	0.421199	0.0931094
YDL002C	NHP10	no	yes	no	no	-0.299966	-0.831695		-0.332953	0.338078	-0.0684832	-0.444605
YDL003W	MCD1	no	yes	no	no	0.418113	0.813045		-0.954896	-0.242492	-0.0271091	-1.05445
YDL004W	ATP16	yes	yes	no	no	0.145173	-0.361095	Class III	1.18918	2.53447	0.605779	1.81032
YDL005C	MED2	no	yes	no	no	0.108294	-0.672611		-0.523402	0.646759	0.430648	-0.180916
YDL006W	PTC1	no	yes	no	no	-0.152009	-0.722548		-0.816949	0.285545	0.36298	0.106013
YDL007W	RPT2	no	yes	no	no	-0.272314	-0.0829012		-1.27413	-0.265268	0.269353	-0.259284
YDL008W	APC11	no	yes	no	no	-0.441791	-0.589925		-0.580769	0.489088	0.330343
YDL009C	YDL009C	no	yes			#NAME?	-2.02754			NA
YDL010W	GRX6	no	yes	no	no	-0.00484133	-0.875932		-0.372563	0.486054	0.119103	-0.539639
YDL011C	YDL011C	no	yes				-2.19746			#N/A
YDL012C	YDL012C	no	yes	no	no	0.377276	-0.481919		-0.728692	0.492154	0.481332	-0.442166
YDL013W	SLX5	no	yes	no	no	-0.908238	-0.996752		-0.787604	-0.154104	-0.106014
YDL014W	NOP1	no	yes	no	no	-0.0806652	-0.53528		-1.93252	-0.991952	0.201058	-0.691325
YDL015C	TSC13	no	yes	no	no	0.0455422	-1.00819	Class II	-0.699103	0.122169	0.0817587	-0.206604
YDL016C	YDL016C	no	yes				-1.79693		-0.364302	NA
YDL017W	CDC7	no	yes	no	no	-0.164969	0.253519		-0.555824	0.0284185	-0.155271
YDL018C	ERP3	no	yes	no	no	0.0245083	-0.767677		-0.2708	0.228054	-0.240659	-0.122304
YDL019C	OSH2	no	yes	no	no	0.782061	0.460496		-0.696179	-0.130127	-0.173461	0.706315
YDL020C	RPN4	no	yes	no	no	-0.232845	-0.679163		0.413413	1.74079	0.587868
YDL021W	GPM2	no	yes	no	no	0.337281	0.139854		1.63232	2.4166	0.0447691	0.830378
YDL022C-A	YDL022C-A	no	yes			2.80332	0.294387		-0.622938	#N/A
YDL022W	GPD1	no	yes	no	no	-0.0771168	-0.702514	Class III	-0.480414	0.085012	-0.174088	0.890604
YDL024C	DIA3	no	yes		no	1.58514	0.121907		0.438463	1.27404	0.096067
YDL025C	RTK1	no	yes	no	no	-0.0965764	-1.00034		0.362735	1.47416	0.371915	0.685244
YDL027C	YDL027C	no	yes	yes	yes	1.50208	2.04702	Class II	0.776142	1.72641	0.210758	0.831318
YDL028C	MPS1	no	yes	no	no	0.0121164	-0.523377		-0.636194	0.0797721	-0.0235475
YDL029W	ARP2	yes	yes	no	no	-0.0417076	-0.916929		-0.519454	0.377592	0.157532	0.20413
YDL030W	PRP9	no	yes	no	no	-0.454695	-0.602026		-0.998696	-0.030758	0.228424	-0.139403
YDL031W	DBP10	no	yes	no	no	-0.371256	-0.53341		-1.35811	-0.592979	0.0256207	-0.493705
YDL033C	SLM3	yes	yes	no	yes	0.493993	1.73791	Class I-2	-0.848136	0.988159	1.09678	0.777608
YDL035C	GPR1	no	yes	no	no	-0.133485	-0.868551		0.0532648	0.976573	0.183795
YDL036C	PUS9	yes	yes	no	yes	0.417515	2.06333		-1.04759	0.0527806	0.360854	2
YDL037C	BSC1	no	yes			2.54028	-2.12707		-3.59617	NA
YDL039C	PRM7	no	yes			#NAME?	-1.09793		-2.77674	2.23451	4.27174
YDL040C	T1	no	yes	no	no	-0.478382	-1.11908		-1.26968	-0.547541	-0.0173753	-0.0441537
YDL042C	SIR2	no	yes	no	no	-0.108184	-0.33444		-0.864949	-0.458345	-0.33291	-0.233314
YDL043C	PRP11	no	yes	no	no	-0.33395	-0.721518		-1.28367	0.419083	0.963237	0.243926
YDL044C	MTF2	yes	yes	no	yes	0.485246	2.47171	Class I-2	-0.563381	1.21282	1.03669	0.0732299
YDL045C	FAD1	no	yes	no	no	0.205001	-0.603985		-0.278674	0.997644	0.536804	0.492937
YDL045W-A	MRP10	yes	yes	no	no	-0.0372414	-0.433459	Class III	-0.391415	0.916368	0.568269	0.460913
YDL046W	NPC2	no	yes	no	no	0.0229833	-0.532598		0.296142	1.07711	0.0414582	0.70866
YDL047W	SIT4	no	yes	no	no	0.0632615	-0.574157		-0.763912	-0.0759061	-0.0515081	0.177268
YDL048C	STP4	no	yes		no	-0.366603	-0.294462		0.119658	2.59157	1.7324
YDL049C	KNH1	no	yes	no	no	0.23107	-0.612503		3.11904	5.12179	1.26323	0.912537
YDL051W	LHP1	no	yes	no	no	-0.266433	-0.490613		-1.4588	-0.573993	0.14529	-0.540341
YDL052C	SLC1	no	yes	no	no	-0.0534265	-0.421201		-0.716222	-0.169369	-0.19266	-0.55373
YDL053C	PBP4	no	yes	no	no	0.0885358	-0.734799		-0.153304	0.80432	0.21811	-0.945924
YDL054C	MCH1	no	yes	no	no	-0.209062	-1.04519		-0.257699	0.468025	-0.01379
YDL055C	PSA1	no	yes	no	no	-0.0434357	0.309844		-1.42139	-0.742727	-0.0608466	-0.166922
YDL056W	MBP1	no	yes	no	no	-0.207138	-0.861698		-0.601055	0.76286	0.624401	0.395672
YDL057W	YDL057W	no	yes	no	no	0.351421	-0.887921		-0.230153	1.01471	0.505345	0.573603
YDL058W	USO1	no	yes	no	no	-0.59018	-1.20996		-1.20081	-0.792127	-0.330826	-0.194019
YDL059C	RAD59	no	yes		no	0.0774966	-0.593138	Class III	-0.719153	-0.647429	-0.66779
YDL060W	TSR1	no	yes	no	no	-0.0717201	-0.50344		-1.6193	-0.76826	0.111523	0.469125
YDL061C	RPS29B	no	yes	no	no	0.0313384	-0.414824		-1.40309	-0.178468	0.485113	-0.710682
YDL062W	YDL062W	no	yes				-2.93444			#N/A
YDL063C	YDL063C	no	yes	no	no	0.00092155	-0.363144		-1.8095	-1.05053	0.0194584	-0.533542
YDL064W	UBC9	no	yes	no	no	-0.161622	-0.522017		-1.10755	-0.0977772	0.270259	-0.191119
YDL065C	PEX19	no	yes	no	no	-0.131419	-0.162905		-0.678433	0.807495	0.746415	-0.0467645
YDL066W	IDP1	yes	yes	yes	yes	1.68186	3.05686	Class II	0.32757	1.13445	0.0673612	-0.554402
YDL067C	COX9	yes	yes	no	no	0.0704372	-0.498232	Class III	1.71008	2.84548	0.395885	2.35222
YDL068W	YDL068W	no	yes			0.21836	-1.19747			-0.350448
YDL069C	CBS1	yes	yes		no	0.235847	0.599923	Class III	-0.316511	1.2968	0.873796
YDL070W	BDF2	no	yes	no	no	-0.309315	-0.637378		-1.28133	-1.13901	-0.597194
YDL071C	YDL071C	no	yes			2.54028	-1.25233		-2.62294	#N/A
YDL072C	YET3	no	yes	no	no	-0.133862	-0.92517		-0.303879	0.665103	0.229468	-0.188154
YDL073W	YDL073W	no	yes	no	no	-0.162098	-0.703562		-1.18347	0.0259686	0.469921	1.70044
YDL074C	BRE1	no	yes	no	no	-0.121527	-0.744505		-1.07666	0.0651859	0.402328	-0.199108
YDL075W	RPL31A	no	yes	no	no	-0.173151	-0.469194		-1.5298	-0.462439	0.327845	-0.63546
YDL076C	RXT3	no	yes	no	no	-0.219359	-0.710046		-0.55272	0.379264	0.19247	-0.410737
YDL077C	VAM6	no	yes	no	no	-0.241952	-0.505657		-0.710581	0.229674	0.200741	-0.253757
YDL078C	MDH3	no	yes	no	no	-0.0327166	-0.460332		0.617386	1.82117	0.46427	1.69216
YDL079C	MRK1	no	yes		no	#NAME?	-0.123118		3.52884	5.1394	0.871047
YDL080C	THI3	no	yes	yes	no	1.26976	0.549308		-0.640749	0.299968	0.201204
YDL081C	RPP1A	no	yes	no	no	-0.375395	-0.693474		-1.49536	-0.995727	-0.239883	-0.691344
YDL082W	RPL13A	no	yes	no	no	-0.296842	-0.5857		-1.67929	-0.692146	0.247632	-0.856246
YDL083C	RPS16B	no	yes	no	no	-0.149056	-0.449892		-1.52239	-0.24286	0.54002	-0.643681
YDL084W	SUB2	no	yes	no	no	-0.100245	-0.639318		-1.2562	-0.466631	0.0500554	-0.398984
YDL085C-A	YDL085C-A	no	yes	no	no	-0.2291	-0.789549		-1.4082	-1.00883	-0.340146	-1.47402
YDL085W	NDE2	yes	yes		yes	2.54641	2.94209	Class II	4.16411	4.89567	-0.00795561	3.26708
YDL086C-A	YDL086C-A	no	yes			2.12525	-0.245721		-1.2079	-1.35045	-0.882061
YDL086W	YDL086W	no	yes	no	no	0.0756857	-0.545447		-0.623829	0.183358	0.0676741	0.0108999
YDL087C	LUC7	no	yes	no	no	0.411867	-0.646252		-1.03163	0.357224	0.649344	-0.442518
YDL088C	ASM4	no	yes	no	no	-0.193862	-0.54086		-0.637568	0.405819	0.303873	-0.00697967
YDL089W	NUR1	no	yes	no	no	0.130324	-0.954561		-0.798856	0.0645899	0.123932	0.0786098
YDL090C	RAM1	no	yes	no	no	-0.478813	-1.05336		-0.994235	-0.0937853	0.160936	0.149895
YDL091C	UBX3	no	yes	no	no	0.406937	-0.941308		0.0993435	1.42883	0.589972	0.81214
YDL092W	SRP14	no	yes	no	no	-0.318752	-0.578258		-1.40673	-0.312646	0.35457	-0.314817
YDL093W	PMT5	no	yes	no	no	0.165341	-0.887051		-0.518501	0.29001	0.0689969	0.0430687
YDL095W	PMT1	no	yes	no	no	0.0407546	-0.688315		-1.18893	-0.666136	-0.216719	-0.365585
YDL097C	RPN6	no	yes	no	no	-0.115287	-0.737996		-1.12073	-0.110545	0.270675	0.0870875
YDL098C	SNU23	no	yes	no	no	0.317043	-0.409686		-1.2736	-0.189293	0.344797	1.57274
YDL099W	BUG1	no	yes	no	no	-0.572027	-0.975908		-0.828862	0.470799	0.560147	1.20048
YDL100C	GET3	no	yes	no	no	0.171921	0.204158		-1.45235	-0.239255	0.473577	-0.0307228
YDL101C	DUN1	no	yes	no	no	-0.215028	-0.41344		-0.813651	0.464584	0.538721	-0.239618
YDL102W	POL3	no	yes	no	no	-0.241073	-0.934431		-1.13783	-0.388861	0.0094541	-1.23977
YDL103C	QRI1	no	yes	no	no	-0.285524	-0.709493		-0.642692	0.111073	0.0142513	-0.11973
YDL104C	QRI7	no	yes	yes	yes	1.82757	2.42795	Class I-2	-0.00716947	1.89099	1.15865	1.1018
YDL105W	NSE4	no	yes	no	no	0.523214	-0.697184		-1.06755	-0.466812	-0.138777	-0.263034
YDL106C	PHO2	no	yes	no	no	-0.0130567	-0.684338		-0.755153	0.397068	0.412707	0.062631
YDL107W	MSS2	yes	yes	no	no	0.010917	0.220847	Class I-1	0.3082	1.57383	0.526111
YDL108W	KIN28	no	yes	no	no	0.165061	-0.416977		-1.19338	-0.174838	0.279029	-0.18124
YDL109C	YDL109C	no	yes		no	-0.720241	-0.631612		-0.209398	1.31252	0.782402
YDL110C	TMA17	no	yes	no	no	0.03943	-0.647628		0.993299	2.28419	0.551373	1.61428
YDL111C	RRP42	no	yes	no	no	0.0539361	-0.453867		-1.69956	-0.494838	0.465208	-0.279881
YDL112W	TRM3	no	yes	no	no	-0.466659	-1.05758		-1.61325	-0.621035	0.2527	-0.121186
YDL113C	ATG20	no	yes	no	no	-0.0645749	-0.848926		0.212943	0.990786	0.0383297	0.644311
YDL114W	YDL114W	no	yes				-0.75001		-2.62294	NA
YDL115C	IWR1	no	yes	no	no	-0.389323	-0.98661		-0.687329	0.535517	0.483332	0.34034
YDL116W	NUP84	no	yes	no	no	-0.531822	-1.07974		-1.03074	0.0134275	0.304658	0.030846
YDL117W	CYK3	no	yes	no	no	-0.392154	-0.933843		-1.19919	-0.447661	0.0120155	-0.983512
YDL118W	YDL118W	no	yes				-0.0275358			#N/A
YDL119C	YDL119C	yes	yes	yes	yes	1.62478	2.49112	Class II	-1.15981	0.394402	0.814694	-0.269187
YDL120W	YFH1	yes	yes	no	no	-0.372621	-0.115814	Class III	-0.442671	0.71456	0.417717	0.155167
YDL121C	YDL121C	no	yes	no	no	0.212268	-0.368144		-0.961893	0.458668	0.681047	-0.216936
YDL122W	UBP1	no	yes	no	no	0.0506684	-0.0933764		-1.10434	0.032317	0.397144	0.0136749
YDL123W	S4	no	yes	no	no	0.365058	-0.521188		-0.637966	0.769847	0.668299	0.53172
YDL124W	YDL124W	no	yes	no	no	0.2917	0.256889		0.596791	1.45952	0.123215	0.883719
YDL125C	HNT1	no	yes	no	no	-0.0478297	-0.584692		-0.296331	0.467092	0.0239091	0.384306
YDL126C	CDC48	no	yes	no	no	-0.225457	-0.759735		-1.04415	-0.169806	0.134831	0.00480643
YDL127W	PCL2	no	yes	no	no	0.3956	-0.224336		-1.10331	0.123292	0.48709
YDL128W	VCX1	no	yes	no	no	0.0698366	-0.861952		-0.255627	0.49467	0.0107829	-0.769507
YDL129W	YDL129W	no	yes		no	0.284448	-0.50888		-0.75829	0.419152	0.437929
YDL130W	RPP1B	no	yes	no	no	-0.163096	-0.743446		-1.4096	-0.566196	0.103895	-0.716586
YDL130W-A	STF1	yes	yes	no	no	0.347232	-0.59103	Class III	2.65929	3.44829	0.0494905	1.99992
YDL131W	LYS21	no	yes	no	no	-0.157259	-1.1281	Class III	-0.452801	0.277171	-0.0095416	-1.20202
YDL132W	CDC53	no	yes	no	no	0.0166167	-0.467579		-0.958687	-0.0132406	0.205932	0.100253
YDL133C-A	RPL41B	no	yes	no	no	-0.395766	-0.956386		-1.20194	-0.563912	-0.101491
YDL133W	YDL133W	no	yes	no	no	-0.109143	-0.85192		-0.468215	0.399737	0.128439
YDL134C	PPH21	no	yes	no	no	-0.042815	-0.984717		-0.490268	0.400905	0.151659	0.0257172
YDL135C	RDI1	no	yes	no	no	-0.141284	-0.971835		-0.387365	0.453088	0.100939	0.276931
YDL136W	RPL35B	no	yes	no	no	-0.223469	-0.821901		-1.50375	-0.698649	0.0655856	-0.679793
YDL137W	ARF2	no	yes	no	no	-0.0448208	-0.379719		-0.0823696	0.629074	-0.0280696	0.313545
YDL138W	RGT2	no	yes	no	no	-0.127416	-0.75499		0.156319	1.03347	0.137634
YDL139C	SCM3	no	yes	no	no	-0.338589	-0.830565		-1.15798	0.426556	0.845017
YDL140C	RPO21	no	yes	no	no	-0.256344	-0.969875		-0.897076	-0.0714199	0.0861424	-0.100182
YDL141W	BPL1	no	yes	no	no	-0.356479	-0.707131		-0.706477	0.204568	0.171531	-0.158971
YDL142C	CRD1	yes	yes	yes	yes	1.35251	2.00146	Class I-2	-0.227318	1.21902	0.706823	0.409391
YDL143W	CCT4	no	yes	no	no	-0.157617	-0.529831		-1.55121	-0.819962	-0.00826296	-0.256633
YDL144C	YDL144C	no	yes	no	no	0.333404	-0.362461		-0.324124	0.732836	0.317446	0.745393
YDL145C	COP1	no	yes	no	no	-0.249428	-0.966375		-1.12257	-0.155241	0.227813	0.0564853
YDL146W	LDB17	no	yes	no	no	-0.372386	-1.17069		-0.882254	0.367153	0.509893
YDL147W	RPN5	no	yes	no	no	-0.221284	-0.868963		-0.96413	0.0305237	0.25514	0.0968933
YDL148C	NOP14	no	yes	no	no	-0.314515	-0.479175		-1.75386	-0.690305	0.324037	-0.827901
YDL149W	ATG9	yes	yes	no	no	0.0407396	-0.914045		0.497356	1.44218	0.205311
YDL150W	RPC53	no	yes	no	no	-0.299711	-0.696772		-1.6382	-0.834979	0.0637125	0.613882
YDL152W	YDL152W	no	yes				-1.09793			#N/A
YDL153C	SAS10	no	yes	no	no	-0.322942	-0.406845		-1.82891	-0.993561	0.0958377	-0.661584
YDL154W	MSH5	no	yes		no	0.21836	-0.634613		-0.50783	1.15205	0.920369
YDL155W	CLB3	no	yes	no	no	0.0587275	-0.813856		-0.870636	-0.265951	-0.134829
YDL156W	YDL156W	no	yes	no	no	-0.423806	-0.99798		-0.481384	-0.0060355	-0.264165	0.679911
YDL157C	YDL157C	no	yes	no	no	-0.0149334	-0.559711	Class III	-0.683119	0.200996	0.144601	0.405053
YDL158C	YDL158C	no	yes			#NAME?	-0.027538		-1.18525	-0.350448	0.0952905
YDL159W	STE7	no	yes	no	no	-0.119082	-0.617185		-0.569726	0.509926	0.340138
YDL160C	DHH1	no	yes	no	no	-0.237449	-0.828064		-0.906132	0.0221895	0.188808	-0.161733
YDL160C-A	YDL160C-A	no	yes	no	no	0.444748	-0.826934		-0.7445	0.51309	0.518076	0.213514
YDL161W	ENT1	no	yes	no	no	-0.108823	-0.661756		-0.84533	0.33166	0.437477	0.0138904
YDL162C	YDL162C	no	yes				-0.612503		-2.43029	#N/A
YDL164C	CDC9	yes	yes	no	yes	1.19239	2.41298		-1.23087	-0.205181	0.286177	-0.360317
YDL165W	CDC36	no	yes	no	no	0.117401	-0.500739		-0.994536	-0.0501218	0.204901	-0.0811571
YDL166C	FAP7	no	yes	no	no	0.000541961	-0.38832		-1.35636	-0.248853	0.367992	0.360007
YDL167C	NRP1	no	yes	no	no	-0.0521201	-0.689757		-1.54766	-0.468916	0.339235	-1.27408
YDL168W	SFA1	no	yes	no	no	-0.132365	-0.874128	Class III	-1.29816	-0.19305	0.365598	0.149659
YDL169C	UGX2	no	yes		no	-0.435866	-0.823867		1.72756	2.59638	0.129309
YDL170W	UGA3	no	yes	no	no	-0.281522	-1.05361		-0.53928	-0.0285195	-0.228753	-0.745427
YDL171C	GLT1	no	yes	no	no	-0.518042	-1.26428	Class III	-1.39661	-0.392779	0.264321	-0.288223
YDL172C	YDL172C	no	yes			#NAME?	-0.7098		-0.622938	0.649552	0.532977
YDL173W	PAR32	no	yes	no	no	0.0366202	-0.358127		-0.443143	0.449757	0.153386	-0.579862
YDL174C	DLD1	yes	yes	yes	yes	2.44053	3.76567	Class II	1.14658	1.80558	-0.0805109	0.758696
YDL175C	AIR2	no	yes	no	no	-0.0158749	-0.617499		-0.53928	0.578526	0.378293	-0.0610756
YDL176W	YDL176W	no	yes	no	no	0.11265	-0.53435		-0.665498	0.327624	0.253609
YDL177C	YDL177C	no	yes		no	0.155623	-0.712039		-0.743232	0.148654	0.152373	-0.205114
YDL178W	DLD2	yes	yes	yes	yes	1.71266	3.29967	Class I-2	-0.397089	0.816475	0.47405	0.0567957
YDL179W	PCL9	no	yes	no	no	0.0264579	-0.708333		-1.0306	-0.110743	0.18034
YDL180W	YDL180W	no	yes	no	no	-0.0818739	-1.02265		0.116672	1.06131	0.205121	-0.475338
YDL181W	INH1	yes	yes	no	no	-0.0163022	-0.469827	Class III	2.25906	3.27511	0.276533	2.3685
YDL182W	LYS20	no	yes	no	no	0.0232486	-0.893394		-0.515906	-0.0644284	-0.288036	-2.34271
YDL183C	YDL183C	no	yes	yes	yes	1.53748	2.21049		0.512945	2.20871	0.956247	1.50389
YDL184C	RPL41A	no	yes	no	no	-0.196398	-0.756203		-1.27579	-0.564157	-0.0278832
YDL185W	VMA1	yes	yes	no	no	-0.305128	-0.80368		-0.943864	-0.488934	-0.284584	-0.519762
YDL186W	YDL186W	no	yes			#NAME?	-2.93443			NA
YDL188C	PPH22	no	yes	no	no	-0.29659	-0.965374		-0.671314	0.400697	0.332497	0.168554
YDL189W	RBS1	no	yes	no	no	-0.305883	-0.692801		-1.32661	-0.270901	0.316192	-0.780883
YDL190C	UFD2	no	yes	no	no	-0.420805	-1.21047		-0.669441	0.024106	-0.0459666	-0.143722
YDL191W	RPL35A	no	yes	no	no	-0.38302	-0.745969		-1.46682	-0.694028	0.0332818	-0.679793
YDL192W	ARF1	no	yes	no	no	-0.223984	-0.484018		-1.29476	-0.447895	0.107352	-0.354699
YDL193W	NUS1	no	yes	no	no	0.123853	-0.75543		-1.03285	-0.0251941	0.268143	-0.453106
YDL194W	SNF3	no	yes		no	0.173505	-0.478486		1.26443	2.53056	0.526624
YDL195W	SEC31	no	yes	no	no	-0.228671	-0.887709		-0.912095	-0.126759	0.0458221	-0.241086
YDL196W	YDL196W	no	yes			-0.103569	-1.21197		1.37706	0.649552	-1.46702
YDL197C	ASF2	no	yes	no	no	-0.339123	-0.622396		-0.0390969	-0.180523	-0.880939
YDL198C	GGC1	yes	yes	no	yes	1.21047	2.7005	Class II	-0.112185	0.992821	0.365492	-0.501517
YDL199C	YDL199C	no	yes	no	no	-0.158115	-1.06852		1.35604	2.01041	-0.085149	1.2578
YDL200C	MGT1	no	yes	no	no	0.0450275	-0.644282		0.41659	1.50925	0.353144
YDL201W	TRM8	no	yes	no	no	-0.0651294	-0.244814		-1.13365	-0.297024	0.0971087	-0.0330453
YDL202W	MRPL11	yes	yes	yes	yes	1.68316	2.44334	Class I-2	-0.520903	0.976039	0.757428	0.574298
YDL203C	ACK1	no	yes	no	no	-0.13734	-0.465601		-0.85447	0.30319	0.418146	0.0473057
YDL204W	RTN2	no	yes	no	no	0.987354	-0.61116		2.48996	3.17545	-0.0540168	2.8189
YDL205C	HEM3	no	yes	no	no	0.123121	-0.556301		0.0275065	1.2778	0.510781	0.74187
YDL206W	YDL206W	no	yes	no	no	0.010042	-0.960426		-0.0820888	1.04485	0.387429
YDL207W	GLE1	no	yes	no	no	0.033559	-0.313798		-0.802694	0.181803	0.244984	0.210946
YDL208W	NHP2	no	yes	no	no	-0.111594	-0.454888		-1.63476	-0.518675	0.376575	-0.644525
YDL209C	CWC2	no	yes	no	no	0.681814	0.666128		-0.691469	-0.153647	-0.201691	-0.0916305
YDL210W	UGA4	no	yes		no	0.255833	-1.09735		0.178516	0.369444	-0.548586
YDL211C	YDL211C	no	yes	no	no	-0.248064	-0.678767		-0.712205	-0.0690347	-0.096343
YDL212W	SHR3	no	yes	no	no	-0.0795258	-0.646907		-0.778105	0.15482	0.193411	-0.125
YDL213C	NOP6	no	yes	no	no	-0.0104335	-0.346521		-1.05212	-0.204756	0.107854	-0.87694
YDL214C	PRR2	no	yes		no	-0.241072	-0.548938		4.29729	5.20126	0.164454
YDL215C	GDH2	no	yes	no	no	-0.397279	-1.13982		3.6036	5.05437	0.711262	3.53373
YDL216C	RRI1	no	yes	no	no	0.212925	-1.07018		0.408771	1.23451	0.0862304
YDL217C	TIM22	yes	yes	no	no	0.0614432	-0.41316	Class III	-0.422405	0.661979	0.34487	0.20941
YDL218W	YDL218W	no	yes			3.72086	0.149337		0.537527	5.58029	4.30325	2.12248
YDL219W	DTD1	no	yes	no	no	-0.118152	-0.735813		-1.39277	-0.120836	0.532418	0.395488
YDL220C	CDC13	no	yes	no	no	-0.186031	-0.767572		-0.766868	0.0296951	0.0570492	-0.807355
YDL221W	YDL221W	no	yes				-0.934433		2.21356	#N/A
YDL222C	FMP45	no	yes	no	no	0.867452	-0.527541	Class II	2.38257	1.98038	-1.14171	2.27505
YDL223C	HBT1	no	yes	no	no	0.758449	-0.110181		1.61875	2.78466	0.426396	3.19544
YDL224C	WHI4	no	yes	no	no	0.0522124	-0.790814		-0.64151	0.439048	0.341044	-0.146264
YDL225W	SHS1	no	yes	no	no	0.0745181	0.130881		-1.05661	0.284228	0.601324	-0.038755
YDL226C	GCS1	no	yes	no	no	-0.18784	-0.607807		-1.20141	-0.322892	0.139004	-0.610274
YDL227C	HO	no	yes	no	no	-0.412977	-0.18525		-1.23866	-0.593848	-0.0946974
YDL229W	SSB1	no	yes	no	no	-0.307135	-0.561753		-1.68196	-0.937099	0.00534389	-1.2207
YDL230W	PTP1	no	yes	no	no	0.144924	0.0541433	Class III	-0.526936	0.380736	0.168158	-0.157356
YDL231C	BRE4	no	yes		no	-0.781641	-0.866604		-1.3029	0.984537	1.54793
YDL232W	OST4	no	yes	no	no	0.275753	-0.558428		-0.350145	1.05673	0.667359
YDL233W	YDL233W	no	yes	no	no	0.418031	-0.402439		-0.101799	0.904333	0.266618
YDL234C	GYP7	no	yes	no	no	0.419764	0.585805		0.874562	1.75888	0.144805	1.04526
YDL235C	YPD1	no	yes	no	no	-0.123671	-0.713842		-1.04119	0.344972	0.646643	-0.0615434
YDL236W	PHO13	no	yes	no	no	-0.060717	-0.544005		-0.978471	-0.192387	0.0465694	-0.6444
YDL237W	AIM6	no	yes	no	no	0.00427274	-0.741759		-0.487689	0.436559	0.184734	0.0199586
YDL238C	GUD1	no	yes	no	no	-0.0942311	-0.586615		0.479841	0.869601	-0.349753	0.684138
YDL239C	ADY3	no	yes			#NAME?	-0.756892		0.35223	NA
YDL240W	LRG1	no	yes	no	no	-0.11545	-0.889549		-0.619466	0.994124	0.874076	-0.664962
YDL241W	YDL241W	no	yes		no	0.566282	-0.532084		-3.29279	-2.17488	0.3784
YDL242W	YDL242W	no	yes			2.21836	-0.102308		0.69899	#N/A
YDL243C	AAD4	no	yes			#NAME?	-0.0561091		-0.0737353	2.55644	1.89066
YDL244W	THI13	no	yes			#NAME?	-1.6125		0.759919	1.502	0.00256244
YDL248W	COS7	no	yes		no	-0.732732	-0.987714		-0.926266	-0.347355	-0.160602
YDR001C	NTH1	no	yes	no	no	-0.204127	-0.770962		0.0623914	0.885143	0.0832377	0.516415
YDR002W	YRB1	no	yes	no	no	-0.190013	-0.711069		-1.77573	-0.704389	0.33183	-0.603927
YDR003W	RCR2	no	yes	no	no	-0.26428	-0.713308		0.301717	0.852783	-0.188447	0.038889
YDR003W-A	YDR003W-A	no	yes			#NAME?	-0.612503		0.499053	NA
YDR004W	RAD57	no	yes	no	no	-0.252947	-0.794563		-0.168679	0.150614	-0.420221
YDR005C	MAF1	no	yes	no	no	-0.163856	-0.828285		-0.0889343	1.02733	0.376746	0.297592
YDR006C	SOK1	no	yes	no	no	0.386971	0.643134		-0.283298	0.740115	0.283899	0.853421
YDR007W	TRP1	no	yes	no	no	-0.108493	-0.427097		-0.0488968	0.930009	0.239392
YDR008C	YDR008C	no	yes			#NAME?	-0.632681		0.441192	-0.10944	-1.29015
YDR009W	GAL3	no	yes		no	0.272807	-0.637449		2.4806	3.87837	0.658258	0.672243
YDR011W	SNQ2	no	yes	no	no	0.177984	-0.714829		-0.686679	-1.00803	-1.06087	-0.315776
YDR012W	RPL4B	no	yes	no	no	-0.0788943	-1.03492		-1.43913	-0.814348	-0.114733	-0.121088
YDR013W	PSF1	no	yes	no	no	0.104343	-0.604898		-0.777661	0.456907	0.495054	-0.341037
YDR014W	RAD61	no	yes	no	no	-0.00522397	-0.845867		-0.46742	0.834428	0.562334
YDR014W-A	HED1	no	yes			-0.317694	-0.753366		1.1426	-0.243532	-2.12564
YDR016C	DAD1	no	yes	no	no	0.226441	-0.75576		-0.686714	-0.106211	-0.159011	-0.332958
YDR017C	KCS1	no	yes	no	no	-0.219642	0.553993		-0.714472	0.220828	0.195786	0.736966
YDR018C	YDR018C	no	yes		no	-0.171587	-0.347531		2.96802	4.49922	0.791681
YDR019C	GCV1	yes	yes	yes	yes	1.7035	3.15662	Class II	-0.36943	-0.311957	-0.682041	-1.04423
YDR020C	DAS2	no	yes	no	no	0.661303	-0.832181		-1.135	0.0348425	0.430329	-0.417018
YDR021W	FAL1	no	yes	no	no	-0.374217	-0.376205		-2.20392	-1.00252	0.461883	-0.489147
YDR022C	CIS1	no	yes	no	no	0.30937	-0.657709		-0.408344	0.373035	0.041865
YDR023W	SES1	no	yes	no	no	-0.288591	-0.759129	Class III	-1.13061	-0.0668894	0.324211	-0.39078
YDR024W	FYV1	no	yes		no	-1.36661	-0.874424		-1.11326	NA
YDR025W	RPS11A	no	yes	no	no	-0.160803	-0.456871		-1.42811	-0.569969	0.118627	-0.642362
YDR026C	YDR026C	no	yes	no	no	-0.130908	-1.02518		-0.874745	-0.307698	-0.172466	0.0556618
YDR027C	VPS54	no	yes	no	no	-0.0264446	-0.685069		-0.753396	0.129189	0.143071	-0.0658021
YDR028C	REG1	no	yes	no	no	-0.401173	-0.89306		-0.255452	0.607139	0.123078	0.288696
YDR029W	YDR029W	no	yes				0.387496			#N/A
YDR030C	RAD28	no	yes		no	-0.0799821	-0.360404		-0.0379755	0.985487	0.283949
YDR031W	MIC14	no	yes	no	no	-0.370415	-0.79095		0.396602	2.25349	1.11737	0.669086
YDR032C	PST2	no	yes	no	no	0.0812588	-0.549692		0.363711	1.27708	0.173852	1.24466
YDR033W	MRH1	no	yes	no	no	0.0831736	-1.02555		-1.24815	-0.0260938	0.482544	-1.64719
YDR034C	LYS14	no	yes	no	no	-0.350689	-0.99079		-0.386317	0.699154	0.345958
YDR034C-C	YDR034C-C	no	yes			#NAME?	-0.991013		-0.367014	1.06113	0.688635
YDR034C-D	YDR034C-D	no	yes			-1.78163	-1.15309		-0.394711	0.760083	0.41528
YDR034W-B	YDR034W-B	no	yes		no	1.10873	-0.140882		3.50635	0.912587	-3.33327
YDR035W	ARO3	no	yes	no	no	0.0665576	-0.768649		-0.909733	0.234999	0.405218	-0.153457
YDR036C	EHD3	no	yes	no	no	0.0077743	1.39342	Class I-2	0.475663	1.5553	0.340119	1.28455
YDR037W	KRS1	no	yes	no	no	-0.209062	-0.768694		-2.1525	-1.28322	0.129771	-1.22812
YDR038C	E5	no	yes			0.328543	-1.02754		-1.04493	-0.53195	-0.226536	-0.161751
YDR040C	E1	no	yes	no	no	-0.295667	-0.901106		-1.03561	-0.566581	-0.270489	-0.161751
YDR041W	RSM10	yes	yes	no	no	0.452639	-0.0304202	Class I-1	-0.0147057	1.4017	0.676896	0.945405
YDR042C	YDR042C	no	yes			0.402784	-1.01776		-2.49741	-0.93541	0.822483
YDR043C	NRG1	no	yes	no	no	0.112281	-0.482747		1.91124	2.97926	0.328508
YDR044W	HEM13	yes	yes	no	no	0.154284	-0.330919	Class III	-0.508118	0.437158	0.205762	0.117411
YDR045C	RPC11	no	yes	no	no	-6.24065e-06	-0.447872		-1.1177	-0.690298	-0.312109	-0.303455
YDR046C	BAP3	no	yes	no	no	-0.180005	-1.19361		-1.31712	-0.393277	0.184332
YDR047W	HEM12	no	yes	no	no	0.162045	-0.527511		-0.404527	0.553732	0.218745	0.111656
YDR049W	VMS1	no	yes	no	no	0.103053	-0.709269		-1.18704	-0.224632	0.222896	-0.475962
YDR050C	TPI1	yes	yes	no	no	-0.0382943	-0.385338		-1.25796	-0.166191	0.352257	-0.417349
YDR051C	DET1	no	yes	no	no	-0.336518	-0.523557		-0.608232	0.597854	0.466572	-0.109773
YDR052C	DBF4	no	yes	no	no	-0.0417489	-0.824877		-1.0016	0.180622	0.442703
YDR053W	YDR053W	no	yes				-0.26458			#N/A
YDR054C	CDC34	no	yes	no	no	-0.197211	-0.735824		-0.307633	0.795415	0.363535	-0.161576
YDR055W	PST1	no	yes	no	no	0.23875	-0.660325		-0.0374184	1.27145	0.569355	-0.353637
YDR056C	YDR056C	no	yes	no	no	-0.131532	-0.723183		-0.451143	0.495929	0.207559	-0.143329
YDR057W	YOS9	no	yes	no	no	0.0518979	-0.692242		-0.366004	0.418301	0.0447913	0.123294
YDR058C	TGL2	no	yes	no	no	0.639738	0.815869		0.44295	1.85042	0.667957	0.634716
YDR059C	UBC5	no	yes	no	no	0.289326	-0.66718		2.46633	3.86467	0.658823	2.33236
YDR060W	MAK21	no	yes	no	no	-0.283606	-0.696752		-1.77909	-0.616603	0.422972	-0.465371
YDR061W	YDR061W	no	yes	yes	yes	2.0491	2.79418	Class I-2	-0.558906	0.786235	0.605627	0.0839013
YDR062W	LCB2	no	yes	no	no	0.0168314	-0.876026		-1.19963	0.0245232	0.48464	0.373848
YDR063W	AIM7	no	yes	no	no	-0.110837	-0.873439		-0.574166	0.788942	0.623594	0.709981
YDR064W	RPS13	no	yes	no	no	-0.257496	-0.53936		-1.51762	-0.337042	0.441063	-0.681982
YDR065W	RRG1	no	yes	no	no	0.186881	1.42446	Class III	-0.622938	0.797651	0.681075
YDR066C	RTR2	no	yes		no	-0.222214	-1.05006		-0.528611	1.25046	1.03955	0.214125
YDR067C	OCA6	no	yes	no	no	-0.060357	-0.49265		-0.843583	0.845618	0.949687	-0.169533
YDR068W	DOS2	no	yes	no	no	-0.352656	-0.930713		-0.7754	0.54962	0.585507	-0.0552618
YDR069C	DOA4	no	yes	no	no	0.0149102	-0.877538	Class II	-0.283522	0.775792	0.319801	-0.178337
YDR070C	FMP16	yes	yes	no	no	0.833879	-0.0906868	Class III	3.45269	5.27056	1.07835	4.294
YDR071C	PAA1	no	yes	no	no	-0.00957939	-0.709924		-0.924642	0.39472	0.579848	-0.25548
YDR072C	IPT1	no	yes	no	no	0.326438	-0.560637		-0.271331	0.178325	-0.289858	-0.392317
YDR073W	SNF11	no	yes	no	no	0.19622	-0.381448		-0.128578	0.723209	0.112274
YDR074W	TPS2	no	yes	no	no	-0.348327	-1.04468		0.558245	0.754751	-0.543008	0.972926
YDR075W	PPH3	no	yes	no	no	-0.105504	-0.941811		-0.700106	0.631974	0.592566	-0.5025
YDR076W	RAD55	no	yes		no	-0.466767	-0.818954		-0.265677	1.04644	0.572606
YDR077W	SED1	yes	yes	no	no	0.370074	-0.521118		0.503588	1.66717	0.424065
YDR078C	SHU2	no	yes		no	0.188915	-1.04949		-0.565907	1.43505	1.26144
YDR079C-A	TFB5	no	yes	no	no	-0.547176	-0.465662		-0.397378	0.782003	0.439867	-0.0210616
YDR079W	PET100	yes	yes	no	no	0.127044	-0.702011	Class I-1	-0.0500483	1.91389	1.22443	0.459998
YDR080W	VPS41	no	yes	no	no	-0.199383	-0.659431		-0.58879	0.429739	0.279015	-0.400538
YDR081C	PDC2	no	yes	no	no	-0.190006	-1.00557		-0.763386	0.500775	0.524647	0.349235
YDR082W	STN1	no	yes		no	1.08086	-0.514892		-0.376298	1.13068	0.767463
YDR083W	RRP8	no	yes	no	no	0.00671309	-0.40451		-1.4902	-0.641716	0.108973	-0.731912
YDR084C	TVP23	no	yes	no	no	-0.0896914	-0.904506		-0.276914	0.473907	0.0113073	0.582938
YDR085C	AFR1	no	yes	no	no	-0.0226489	-0.325551		1.29181	2.76807	0.736738
YDR086C	SSS1	no	yes	no	no	-0.33675	-0.683483		-1.30172	-0.471035	0.0911738	-0.511242
YDR087C	RRP1	no	yes	no	no	-0.0454596	-0.197466		-1.69751	-0.450043	0.507956	-0.266629
YDR088C	SLU7	no	yes	no	no	-0.15635	-0.964694		-0.400546	0.808701	0.469733	-0.0909085
YDR089W	YDR089W	no	yes	no	no	-0.284979	-1.05161		-1.27468	-0.676861	-0.141693	-0.886343
YDR090C	YDR090C	no	yes	no	no	0.0592571	-0.82071		-0.0687816	0.564663	-0.106069
YDR091C	RLI1	no	yes	no	no	0.963324	1.50431		-1.54971	-0.588146	0.222053	-0.349595
YDR092W	UBC13	no	yes	no	no	0.304839	-0.604131		-0.82049	0.504004	0.58498	0.156758
YDR093W	DNF2	no	yes	no	no	-0.0110623	-0.828711		-0.918277	-0.38102	-0.202257	-0.598058
YDR094W	YDR094W	no	yes			0.0167253	-0.760602		-0.949832	-0.79102	-0.580702
YDR096W	GIS1	no	yes	no	no	-0.10587	-0.326867		0.58861	1.73051	0.402384	0.27739
YDR097C	MSH6	no	yes	no	no	-0.219574	-1.02918		-1.14645	-0.271879	0.135061	-0.351657
YDR098C	GRX3	no	yes	no	no	-0.0913943	-0.744164		-1.12868	-0.0025831	0.386586	-0.631071
YDR098C-B	YDR098C-B	no	yes				1.38746		-0.327937	0.585555	0.173979
YDR099W	BMH2	no	yes	no	no	-0.119236	-0.829594		-0.273354	0.655727	0.189566	0.381727
YDR100W	TVP15	no	yes	no	no	0.257945	-0.774557		0.0170835	1.07976	0.323164
YDR101C	ARX1	no	yes	no	no	0.0349954	-0.380616		-1.86734	-0.678293	0.449535	-0.544296
YDR102C	YDR102C	no	yes			#NAME?	0.0395735		0.114028	NA
YDR103W	STE5	no	yes	no	no	0.192286	0.296467		-0.766072	0.292336	0.318893	0.289507
YDR104C	SPO71	no	yes	yes	yes	1.5914	1.737		-0.253514	0.611305	0.125306
YDR105C	TMS1	no	yes	no	no	0.109335	-0.972202		-0.175763	0.150804	-0.412946
YDR106W	ARP10	no	yes			0.94827	-0.274633		-0.566354	0.614787	0.441628
YDR107C	TMN2	no	yes	no	no	0.12126	-0.625833		-0.481384	0.426534	0.168404	-0.38247
YDR108W	GSG1	no	yes	no	no	-0.357248	-0.770318		-1.17119	0.0284705	0.460146	-0.893085
YDR109C	YDR109C	no	yes	no	no	0.282271	-0.975073		-0.489539	0.618964	0.368989	0.337035
YDR110W	FOB1	no	yes	no	no	-0.394125	-0.498443		-1.19028	-0.0471784	0.40359
YDR111C	ALT2	no	yes	no	no	0.126467	-0.497214		-0.527537	0.588877	0.3769	1.50383
YDR112W	IRC2	no	yes				-0.612501		0.377062	#N/A
YDR113C	PDS1	no	yes	no	no	0.154866	-0.63312		-0.959501	0.0902297	0.310217
YDR114C	YDR114C	no	yes			#NAME?	-1.61251			#N/A
YDR115W	YDR115W	yes	yes	no	no	0.277707	-0.333356	Class I-1	-0.265278	0.267417	-0.206818	2.71966
YDR116C	MRPL1	yes	yes	yes	yes	1.41721	3.29222	Class I-2	-0.0985677	1.42936	0.788419	0.524804
YDR117C	TMA64	no	yes	no	no	-0.279026	-0.835823		-1.38572	-0.50982	0.136386	-0.397147
YDR118W	APC4	no	yes	no	no	-0.146925	-0.446422		-1.03941	0.588152	0.88805
YDR118W-A	YDR118W-A	no	yes			0.317895	-0.249933		-0.0924233	-0.613482	-1.26057
YDR119W	VBA4	no	yes	no	no	-0.0959922	-1.06747		-0.994713	-0.366803	-0.111603	0.0127673
YDR119W-A	YDR119W-A	no	yes		no	0.421893	-0.725079		4.91039	6.00237	0.352465	2.98277
YDR120C	TRM1	yes	yes	no	no	0.0696443	0.321361	Class II	-1.52808	-0.712376	0.0761891	0.0588317
YDR121W	DPB4	no	yes	no	no	-0.092742	-0.27117		-1.29986	-0.0383187	0.522028	-0.236776
YDR122W	KIN1	no	yes	no	no	-0.25459	-0.783041		-0.194283	0.197259	-0.347971	0.238638
YDR123C	INO2	no	yes	no	no	0.504663	0.0314949		-1.00996	0.456907	0.727355
YDR124W	YDR124W	no	yes			-0.0711473	-0.238108		0.0291387	-3.35045	-4.1191
YDR125C	ECM18	no	yes		no	1.23799	1.44026		0.447451	1.70018	0.513213
YDR126W	SWF1	no	yes		no	0.0328034	-0.628563		-0.396429	0.923475	0.580391
YDR127W	ARO1	no	yes	no	no	-0.461597	-0.995805		-0.180152	0.636329	0.0769672	-0.18253
YDR128W	MTC5	no	yes	no	no	0.0732838	-0.70735		-0.494016	-0.0241449	-0.269642	0
YDR129C	SAC6	no	yes	no	no	-0.304802	-0.523839	Class II	-0.660986	0.166194	0.0876663	0.161128
YDR130C	FIN1	no	yes	no	no	-0.0715367	-0.555046		-0.168372	0.955318	0.384176
YDR131C	YDR131C	no	yes	no	no	0.19998	-0.176785		-0.304463	0.806278	0.371227	0.198546
YDR132C	YDR132C	no	yes	no	no	-1.12809	-0.718057		-0.0138294	0.931588	0.205904	0.765535
YDR133C	YDR133C	no	yes	no	no	0.282949	-0.884654		0.342453	0.0206998	-1.06127
YDR135C	YCF1	no	yes	no	no	-0.132174	-1.08063		-0.994846	-0.170871	0.0844616	-0.752876
YDR136C	VPS61	no	yes			#NAME?	-1.6125		0.377062	-0.350448	-1.46702
YDR137W	RGP1	no	yes	no	no	-0.0695889	0.199732		-0.498735	0.571784	0.331005	0.336283
YDR138W	HPR1	no	yes	no	no	-0.0862857	-1.03048		-0.829251	-0.498678	-0.408941	0.366985
YDR139C	RUB1	no	yes	no	no	0.0334414	-0.625965		-0.875704	-0.163077	-0.0268871	-0.485054
YDR140W	MTQ2	no	yes	no	no	-0.298432	-0.640067		-1.22827	-0.599072	-0.110317	-0.359639
YDR141C	DOP1	no	yes	no	no	-0.370959	-1.38342		-0.722279	-0.00165013	-0.0188846	-0.269313
YDR142C	PEX7	no	yes	no	no	0.319538	-0.245237		-0.10654	1.12186	0.488883	0.971986
YDR143C	SAN1	no	yes	no	no	0.140536	-0.559923		-1.13992	0.0439501	0.444354	-1.26303
YDR144C	MKC7	no	yes	no	no	-0.0613314	-0.47009		-1.91975	-1.50823	-0.327992	-0.584963
YDR145W	TAF12	no	yes	no	no	0.116845	-0.783381		-0.610479	0.580115	0.451081	-0.554303
YDR146C	SWI5	no	yes	no	no	-0.319178	-0.938374		-0.792088	0.260582	0.313157
YDR147W	EKI1	no	yes	no	no	-0.0905128	-0.741726		-1.33638	-0.722181	-0.12532
YDR148C	KGD2	yes	yes	no	yes	0.119854	2.61958	Class II	2.24822	3.39867	0.410935	2.32869
YDR149C	YDR149C	no	yes				0.124462			#N/A
YDR150W	NUM1	no	yes	no	no	-0.516935	-0.844275		0.159587	0.843508	-0.055593	0.308296
YDR151C	CTH1	no	yes	no	no	-0.123241	-0.550676		-0.578407	-0.038881	-0.199988
YDR152W	GIR2	no	yes	no	no	-0.254911	-0.599658		-1.34882	-0.265785	0.343525	-0.137071
YDR153C	ENT5	no	yes	no	no	0.0182516	-0.468231		-0.572066	0.59916	0.431712	1.09169
YDR154C	YDR154C	no	yes	no	no	0.11423	-0.0454624		-0.965003	-0.0489391	0.176551
YDR155C	CPR1	no	yes	no	no	0.0595567	-0.31035		-0.936234	0.22469	0.42141	0.123003
YDR156W	RPA14	no	yes	no	no	0.119869	-0.456419		-1.22035	-0.178152	0.302686	-1.64317
YDR157W	YDR157W	no	yes			0.472116	-0.517346		-1.24826	1.64955	2.1583
YDR158W	HOM2	no	yes	no	no	-0.0819041	-0.833371		-1.01025	-0.0649264	0.205815	-0.764139
YDR159W	SAC3	no	yes	no	no	-0.136269	-0.569406		-0.936063	0.0913541	0.287904	0.273018
YDR160W	SSY1	no	yes	no	no	0.354563	-1.23437		-0.201	1.07954	0.541027
YDR161W	YDR161W	no	yes	no	no	-0.180785	-0.209461		-1.92947	-0.949422	0.240538	-0.489271
YDR162C	NBP2	no	yes	no	no	-0.00504819	-0.851744		-0.534582	0.747484	0.542553	0.130026
YDR163W	CWC15	no	yes	no	no	-0.0479957	-0.642938		-0.36241	0.748453	0.37135	-0.847997
YDR164C	SEC1	no	yes	no	no	-0.0952055	-0.912416		-0.616076	0.300959	0.177521	0.00737953
YDR165W	TRM82	no	yes	no	no	-0.0326156	-0.405586		-2.03195	-0.919353	0.373085	-0.770893
YDR166C	SEC5	no	yes	no	no	-0.358408	-0.566277		-0.694264	0.254806	0.209557	0.297266
YDR167W	TAF10	no	yes	no	no	-0.129234	-0.623133		-0.627238	0.0890173	-0.0232582	-0.133231
YDR168W	CDC37	no	yes	no	no	-0.26435	-0.853407		-0.676343	0.41862	0.35545	0.0247139
YDR169C	STB3	no	yes	no	no	0.0546222	-0.666078		0.186959	1.37466	0.448186	0.334001
YDR169C-A	YDR169C-A	no	yes				-0.612503		0.184417	#N/A
YDR170C	SEC7	no	yes	no	no	-0.647685	-1.40352		-1.12411	-0.646929	-0.262332	0.148504
YDR170W-A	YDR170W-A	no	yes		no	-0.210484	-0.865922		-0.803088	-1.04964	-0.986065	#NUM!
YDR171W	HSP42	no	yes	no	yes	0.528234	1.65871		1.28155	1.59052	-0.430543	0.850874
YDR172W	SUP35	no	yes	no	no	-0.267998	-0.69991		-1.19631	0.630535	1.08733	-0.215005
YDR173C	ARG82	no	yes	no	no	-0.005112	-0.178993		-0.319546	0.670955	0.250987	0.546827
YDR174W	HMO1	no	yes	no	no	-0.110127	-0.692938		-0.94901	-0.32121	-0.111714	-0.252079
YDR175C	RSM24	yes	yes	no	yes	0.540287	2.82621	Class I-2	-0.102464	1.18085	0.5438	0.751592
YDR176W	NGG1	no	yes	no	no	-0.446202	-0.658839		-0.729247	0.00199494	-0.00827182	-0.140178
YDR177W	UBC1	no	yes	no	no	0.114341	-0.487456		-0.208361	0.792997	0.261844	0.36882
YDR178W	SDH4	yes	yes	no	no	-0.0658997	-0.220645	Class III	2.76628	3.85228	0.346481	1.92402
YDR179C	CSN9	no	yes	no	no	0.533861	-0.750649		-0.878777	1.16514	1.3044	0.521346
YDR179W-A	YDR179W-A	no	yes	no	no	0.185445	-0.498547		-2.0559	-0.59507	0.721314
YDR180W	SCC2	no	yes	no	no	-0.295645	-0.979042		-1.37173	-0.404989	0.227229	-1.91427
YDR181C	SAS4	no	yes	no	no	-0.437425	-0.7809		-0.262144	0.589743	0.112373
YDR182W	CDC1	no	yes	no	no	-0.0318608	-0.901693		-0.829511	-0.071563	0.0184345	0.306445
YDR182W-A	YDR182W-A	no	yes				-2.24477		-1.00145	#N/A
YDR183C-A	YDR183C-A	no	yes			0.703786	-0.290575		-1.50746	1.78706	2.555
YDR183W	PLP1	no	yes	no	no	-0.0311969	-0.910471		-1.03011	0.536699	0.827299	-0.197939
YDR184C	ATC1	no	yes	no	no	0.0358811	-0.590048		-1.67227	-0.645114	0.287638
YDR185C	UPS3	no	yes		no	-0.155456	-0.100231		-1.49083	-0.0791456	0.672175
YDR186C	YDR186C	no	yes	no	no	-0.193286	-0.467366		-0.147828	1.25477	0.663088
YDR187C	YDR187C	no	yes				1.38749			#N/A
YDR188W	CCT6	no	yes	no	no	-0.209004	-0.632583		-0.989631	-0.502268	-0.25215	0.0875992
YDR189W	SLY1	no	yes	no	no	-0.252062	-0.788981		-1.16823	-0.307526	0.121188	0.559771
YDR190C	RVB1	no	yes	no	no	-0.00359219	-0.0308812		-1.21643	-0.0763457	0.400573	-0.102844
YDR191W	HST4	no	yes	no	no	0.0682556	-0.483481		-0.820239	-0.224394	-0.143668
YDR192C	NUP42	no	yes	no	no	-0.118274	0.235889		-0.674969	0.445588	0.381043	-0.434403
YDR193W	YDR193W	no	yes				-0.612508			#N/A
YDR194C	MSS116	yes	yes	yes	yes	2.53374	3.06351	Class I-2	-0.894705	0.477324	0.632516	0.203806
YDR195W	REF2	no	yes	no	no	-0.0461557	-0.62859	Class III	-0.892914	0.177517	0.330918	0.180771
YDR196C	CAB5	no	yes	no	no	-0.0835552	-0.508772		-0.674053	0.627026	0.561565	0.0914638
YDR197W	CBS2	yes	yes	no	yes	0.801238	1.90704	Class I-2	-0.414889	1.20398	0.879356
YDR198C	RKM2	no	yes	no	no	-0.303594	-0.703432		-0.827758	-0.164636	-0.0763914	1.57435
YDR200C	VPS64	no	yes	no	no	-0.239904	-0.748769		-0.415133	0.642666	0.318285	0.233672
YDR201W	SPC19	no	yes	no	no	-0.313288	-0.856184		-0.843965	-0.0689338	0.0355174	-0.0780025
YDR202C	RAV2	no	yes	no	no	-0.227705	-0.975227		-0.127882	0.711908	0.100277	0.496426
YDR203W	YDR203W	no	yes			#NAME?	0.609889			#N/A
YDR204W	COQ4	yes	yes	yes	yes	1.26588	2.88715	Class II	0.196949	0.862987	-0.0734749	-0.196161
YDR205W	MSC2	no	yes	no	no	0.0926255	-1.08226		-0.788747	-0.0646143	-0.0153811	-0.0430687
YDR206W	EBS1	no	yes	no	no	-0.00347163	-0.916531		-0.809559	0.353203	0.423248	-0.0577155
YDR207C	UME6	no	yes	no	no	-0.152009	-0.477296		-0.344384	0.20512	-0.190009	-1.09622
YDR208W	MSS4	no	yes	no	no	0.141283	-0.701254		-0.426444	0.36671	0.05364	-1.28011
YDR210C-C	YDR210C-C	no	yes			-0.0935843	-0.741786		-0.261695	0.722795	0.244976
YDR210C-D	YDR210C-D	no	yes			-0.093585	-0.821955		-0.33238	0.586891	0.179758
YDR210W	YDR210W	no	yes	no	no	0.297205	-0.520806		-1.90753	-0.95789	0.210122
YDR210W-A	YDR210W-A	no	yes			-0.0446759	-0.934432		-0.326723	0.888692	0.475902
YDR210W-B	YDR210W-B	no	yes			-0.296224	-0.941813		-0.386718	0.651214	0.298417
YDR211W	GCD6	no	yes	no	no	-0.288884	-0.851212		-1.38392	-0.56238	0.0820303	-0.394511
YDR212W	TCP1	no	yes	no	no	-0.316319	-0.531805		-1.26946	-0.578755	-0.0488075	-0.466171
YDR213W	UPC2	no	yes	no	no	-0.342792	-0.244621		-1.05289	-0.2467	0.0666761	-1.44057
YDR214W	AHA1	no	yes	no	no	-0.143579	-0.431723	Class III	-0.572675	0.124371	-0.0424675	-0.290602
YDR215C	YDR215C	no	yes				-0.290575			0.649552
YDR216W	ADR1	no	yes	no	no	-0.491891	-1.17759		2.14929	3.31924	0.430437	-1.11229
YDR217C	RAD9	no	yes	no	no	-0.354651	-0.652469		-0.967081	-0.117149	0.110418
YDR218C	SPR28	no	yes			0.540292	-0.731146		1.5239	2.19387	-0.0695442
YDR219C	MFB1	no	yes	yes	yes	1.9188	2.86742		-0.4684	0.850146	0.579032	-0.347923
YDR220C	YDR220C	no	yes		no	#NAME?	-0.497486		-0.857403	#N/A
YDR221W	GTB1	no	yes	no	no	0.187271	-0.588266		-0.747586	0.214442	0.222514	0.0507374
YDR222W	YDR222W	no	yes	no	no	-0.236723	-0.640248		-1.38952	-0.510389	0.139618	-0.516331
YDR223W	CRF1	no	yes		no	1.09283	-1.10044		3.40145	3.57655	-0.564409
YDR224C	HTB1	no	yes	no	no	0.0463122	-0.557643		-0.956384	0.214017	0.430888	0.411095
YDR225W	HTA1	no	yes	no	no	0.0056933	-0.647308		-0.895206	0.0772548	0.232947	-0.00449117
YDR226W	ADK1	yes	yes	no	no	-0.102455	-0.251687	Class III	-0.619159	0.520406	0.400051	-0.0794117
YDR227W	SIR4	no	yes	no	yes	1.21273	2.76605		-0.47176	0.373479	0.105725	-0.111031
YDR228C	PCF11	no	yes	no	no	-0.0283471	-0.68911		-1.00387	0.27607	0.54043	0.452207
YDR229W	IVY1	no	yes	no	no	-0.242854	-0.295706		-0.34786	0.469866	0.0782125	-0.48737
YDR230W	YDR230W	no	yes				-1.93444			#N/A
YDR231C	COX20	yes	yes	no	no	0.50509	1.37369	Class I-2	1.31265	1.70963	-0.342532	0.941665
YDR232W	HEM1	yes	yes	yes	yes	1.52118	3.15652	Class II	0.244482	1.25898	0.274986	-1.14056
YDR233C	RTN1	no	yes	no	no	-0.00104959	-0.734422		-1.0998	0.0215377	0.381824	-0.213247
YDR234W	LYS4	yes	yes	yes	yes	1.69346	3.23166	Class II	-0.702414	-0.0902814	-0.127381	-1.9498
YDR235W	PRP42	no	yes	no	no	-0.324293	-0.992611		-0.906841	0.343125	0.510453	0.142019
YDR236C	FMN1	yes	yes	no	no	-0.000475478	-0.752596	Class II	-0.46657	0.965531	0.692587	-0.564484
YDR237W	MRPL7	yes	yes	no	yes	0.0693399	2.05166	Class I-2	-0.230491	1.09708	0.588058	0.579734
YDR238C	SEC26	no	yes	no	no	-0.411764	-1.19364		-1.09634	-0.311724	0.0451002	-0.206479
YDR239C	YDR239C	no	yes	no	no	-0.238944	-0.804963		-0.960101	0.343852	0.564438	-0.152003
YDR240C	SNU56	no	yes	no	no	0.430768	-0.823332		-0.815583	0.114642	0.190712	-0.293731
YDR241W	BUD26	no	yes		no	-0.629638	-1.56467		-0.470935	0.386518	0.117939
YDR242W	AMD2	no	yes		no	0.0484341	1.42462		-0.35429	1.89056	1.50534
YDR243C	PRP28	no	yes	no	no	0.0770651	-0.0734881		-0.866011	-0.1494	-0.0229031	-0.207746
YDR244W	PEX5	no	yes	no	no	-0.284251	-0.640057		0.260869	1.36141	0.361029	0.658963
YDR245W	MNN10	no	yes	no	no	0.238375	-1.03243		-1.50544	-0.78708	-0.0211488	-0.352768
YDR246W	TRS23	no	yes	no	no	0.341742	-0.544262		-0.0488968	1.22121	0.530589	0.0524674
YDR246W-A	YDR246W-A	no	yes			-3.589	-1.22917		0.377062	NA
YDR247W	VHS1	no	yes	no	no	0.405529	-0.547722		0.135805	1.43149	0.556177
YDR248C	YDR248C	no	yes	no	no	0.0563916	-0.598697		-1.11675	0.437182	0.814421	-0.353817
YDR249C	YDR249C	no	yes		no	0.0231026	-0.531253		-0.973625	0.131945	0.366057
YDR250C	YDR250C	no	yes			0.955326	-0.336869			#N/A
YDR251W	PAM1	no	yes	no	no	-0.284451	-1.05617		-0.671983	0.428632	0.361102	-0.554441
YDR252W	BTT1	no	yes	no	no	-0.399909	-0.876247		-0.29363	0.346274	-0.0996089
YDR253C	MET32	no	yes			-1.53653	-0.290575		-0.318083	1.01879	0.597356
YDR254W	CHL4	no	yes	no	no	-0.294195	-0.775496		-0.887354	0.261891	0.409731
YDR255C	RMD5	no	yes	no	no	0.107754	-0.919593		0.467877	2.18561	0.978214	0.925999
YDR256C	CTA1	no	yes		no	-0.897121	-0.843283		6.34183	10.1915	3.11011	4.79668
YDR257C	RKM4	no	yes	no	no	-0.304612	-1.07894		-1.34176	-0.368797	0.233446	-0.378512
YDR258C	HSP78	yes	yes	no	no	-0.012605	1.22178	Class I-2	1.0801	1.59177	-0.227845	0.609315
YDR259C	YAP6	no	yes		no	0.0663562	-0.503186		0.20595	1.82464	0.879175
YDR260C	SWM1	no	yes	no	no	0.140108	-0.635874		-0.84823	-0.0846756	0.024041
YDR261C	EXG2	no	yes	no	no	0.00761359	-0.509385		-1.88747	-0.998835	0.149119	-1.09785
YDR261C-D	YDR261C-D	no	yes			-0.518605	-0.934416		-0.326491	0.527649	0.114626
YDR261W-A	YDR261W-A	no	yes			-1.96927	-0.383022		-0.335424	0.885441	0.48135
YDR261W-B	YDR261W-B	no	yes			-1.16631	-0.447444		-0.395552	0.706842	0.36288
YDR262W	YDR262W	no	yes	no	no	0.151664	-0.462484		0.120582	1.26814	0.408047	1.13422
YDR263C	DIN7	yes	yes		yes	1.73773	2.57826		-0.371399	0.479627	0.111513
YDR264C	AKR1	no	yes	no	no	0.12239	-0.764506		-0.772395	-0.677767	-0.644885	-0.931683
YDR265W	PEX10	no	yes	no	no	-0.00568125	-0.353541		0.126909	1.07954	0.213118
YDR266C	YDR266C	no	yes	no	no	-0.179787	-1.04947		-1.2343	-0.0918221	0.402964	-0.665162
YDR267C	CIA1	no	yes	no	no	-0.164607	-0.657698		-0.745335	-0.24744	-0.241619	-0.117039
YDR268W	MSW1	yes	yes	yes	yes	1.4017	2.87818	Class I-2	-0.757781	0.37048	0.388747	0.167074
YDR270W	CCC2	no	yes	no	no	-0.0381713	-0.677494		0.558914	1.18105	-0.117379
YDR271C	YDR271C	no	yes			-0.781643	-1.02754			NA
YDR272W	GLO2	no	yes	no	no	-0.065609	-0.800422	Class III	-0.0430252	0.753149	0.0566603	0.45367
YDR273W	DON1	no	yes			-1.34107	-0.486972		-1.05904	-1.21294	-0.893421
YDR275W	BSC2	no	yes	no	no	-0.0424051	-0.499423		0.372213	2.44657	1.33484
YDR276C	PMP3	no	yes	no	no	0.13235	-0.780809		0.0737511	1.72721	0.913945
YDR277C	MTH1	no	yes	no	no	0.55586	-0.385661		0.711287	1.53818	0.0873797
YDR278C	YDR278C	no	yes			0.955324	-1.99953		-0.403294	0.256093	-0.0801267
YDR279W	RNH202	no	yes	no	no	-0.0113753	-0.56788		-0.959778	0.478698	0.698962	-1.49803
YDR280W	RRP45	no	yes	no	no	-0.166818	-0.721254		-1.63016	-0.486454	0.40419	-0.0738907
YDR281C	PHM6	no	yes			#NAME?	0.387497			-2.44356
YDR282C	YDR282C	no	yes	yes	yes	1.67999	2.5964		-0.0668882	1.07582	0.403192
YDR283C	GCN2	no	yes	no	no	-0.578055	-1.00377		-0.636927	0.260849	0.158262	0.302563
YDR284C	DPP1	no	yes	no	no	0.0271491	-0.882753		-0.773124	0.00610388	0.0397138	-0.45268
YDR285W	ZIP1	no	yes		no	-1.25295	-0.509974		-0.483387	-0.971936	-1.22806
YDR286C	YDR286C	no	yes	no	no	-0.216951	-0.39574		-0.177906	0.677567	0.115959
YDR287W	INM2	no	yes	no	no	0.165992	-0.570774		0.212365	0.676436	-0.275443	0.022738
YDR288W	NSE3	no	yes	no	no	-0.388726	-0.694083		-0.58746	0.576796	0.424742	-0.437809
YDR289C	RTT103	no	yes	no	no	-0.267068	-0.412782		-0.798278	0.389047	0.447811	0.227963
YDR291W	HRQ1	no	yes	no	no	-0.321007	-1.08039		-0.69677	0.170105	0.127362	1.09954
YDR292C	SRP101	no	yes	no	no	0.142596	-0.491356		-1.20509	-0.58769	-0.122118	-0.558084
YDR293C	SSD1	no	yes	no	no	-0.332072	-0.95933		-0.377879	0.490471	0.128836	-0.180879
YDR294C	DPL1	no	yes	no	no	-0.0852443	-0.954088		-0.113599	0.676953	0.0510377	-0.146183
YDR295C	HDA2	no	yes	no	no	0.133256	-0.452706		-0.950992	0.277756	0.489234	0.219313
YDR296W	MHR1	yes	yes	no	yes	0.573294	2.08748	Class I-2	-0.0888764	1.29738	0.646744	1.28211
YDR297W	SUR2	no	yes	no	no	0.0396125	-0.546869		-0.207095	0.280661	-0.251758	-0.0675859
YDR298C	ATP5	yes	yes	no	yes	0.0642043	2.07035	Class III	1.46893	2.49592	0.287479	1.97267
YDR299W	BFR2	no	yes	no	no	-0.0819305	-0.449628		-1.3804	-0.866183	-0.225298	-0.760919
YDR300C	PRO1	no	yes	no	no	-0.401748	-0.873142		-1.10331	-0.0849865	0.278808	-0.588332
YDR301W	CFT1	no	yes	no	no	-0.342887	-0.934238		-0.862238	-0.206401	-0.0836772	0.152003
YDR302W	GPI11	no	yes	no	no	-0.346139	-0.92326		-1.16217	0.0292156	0.451875	-0.210218
YDR303C	RSC3	no	yes	no	no	-0.0270406	-0.833484		-1.03918	-0.184941	0.114726	-0.310021
YDR304C	CPR5	no	yes	no	no	0.0948506	-0.542071		-0.786966	0.266224	0.313676	-0.105032
YDR305C	HNT2	no	yes	no	no	0.214674	0.980379	Class III	-0.198185	0.676106	0.134777	0.206929
YDR306C	YDR306C	no	yes	no	no	0.256327	-0.741545		0.105122	1.23631	0.391679
YDR307W	YDR307W	no	yes	no	no	0.0298639	-1.15597		-0.43547	0.34692	0.0428762	0.433185
YDR308C	SRB7	no	yes	no	no	-0.114216	-0.580639		-0.662287	0.82134	0.744113	-1.52438
YDR309C	GIC2	no	yes	no	no	-0.0117129	-0.692165		-1.62294	-0.098837	0.784587
YDR310C	SUM1	no	yes	no	no	-0.334465	-0.80013		-0.776675	-0.159055	-0.121895	-0.101753
YDR311W	TFB1	no	yes	no	no	-0.081046	-0.714084		-0.814645	0.0813	0.156431	-0.287469
YDR312W	SSF2	no	yes	no	no	-0.211785	-0.667613		-1.33536	-0.359493	0.236355	-0.736966
YDR313C	PIB1	no	yes	no	no	0.259001	-0.00707641		0.729622	2.18153	0.712398	-0.169925
YDR314C	RAD34	no	yes		no	-0.185538	-1.07423		-0.152557	1.03202	0.445066
YDR315C	IPK1	no	yes	no	no	-0.138902	-0.539819		-0.108365	0.161759	-0.46939
YDR316W	OMS1	no	yes	yes	yes	1.56231	2.48627	Class I-2	-0.550182	1.24921	1.05988	0.524691
YDR317W	HIM1	yes	yes		no	0.355863	-0.702701		-2.8574	-1.67238	0.445514
YDR318W	MCM21	no	yes	no	no	-0.0360623	-0.762568		-0.574028	0.339484	0.173999
YDR319C	YDR319C	no	yes	no	no	0.0752722	-0.835974		-0.370454	0.276094	-0.0929662
YDR320C	SWA2	no	yes	no	no	-0.443028	-0.5922		-1.1216	0.0378364	0.419923	0.261198
YDR320C-A	DAD4	no	yes	no	no	0.262191	-0.331997		-0.168372	0.941508	0.370367	0.0471867
YDR321W	ASP1	no	yes	no	no	-0.249183	-0.627628		-2.02062	-1.10198	0.179128	-0.993068
YDR322C-A	TIM11	yes	yes	no	no	-0.0534455	-0.671284	Class III	1.43734	2.56922	0.392364	1.6193
YDR322W	MRPL35	yes	yes	no	no	-0.0882607	0.502891	Class I-1	-0.114831	1.52624	0.901561	0.461248
YDR323C	PEP7	no	yes	no	no	0.145193	-0.693383		-0.180933	0.863996	0.305416
YDR324C	UTP4	no	yes	no	no	-0.264242	-0.300601		-1.69498	-0.471754	0.483711	-0.63417
YDR325W	YCG1	no	yes	no	no	-0.457489	-1.23846		-1.00638	-0.284281	-0.0174181	0.952212
YDR326C	YSP2	yes	yes	no	no	-0.200972	-0.67075		-1.30817	-0.38682	0.181837	-1
YDR328C	SKP1	no	yes	no	no	-0.0965368	-0.61897		-0.438125	0.150902	-0.150487	0.543494
YDR329C	PEX3	no	yes	no	no	-0.0135368	-0.635276		-0.00304172	0.806496	0.0700243	0.137504
YDR330W	UBX5	no	yes	no	no	0.124776	-0.772968		-0.217561	0.802079	0.280126	0.653027
YDR331W	GPI8	no	yes	no	no	0.175368	-0.546647		-1.13381	-0.524835	-0.130541	-0.59368
YDR332W	IRC3	no	yes		no	1.82243	1.29887	Class III	-0.153725	1.34022	0.754436
YDR333C	YDR333C	no	yes	no	no	-0.158017	-0.995658		-1.17161	-0.338464	0.0936341	-0.451989
YDR334W	SWR1	no	yes	no	no	-0.245773	-1.1332		-0.685089	0.3838	0.329375	-0.223626
YDR335W	MSN5	no	yes	no	no	-0.350246	-1.35844		-0.652891	0.0123874	-0.074235	0.102457
YDR336W	YDR336W	no	yes	no	no	0.630413	1.44215	Class II	-0.770871	0.0201958	0.0515535
YDR337W	MRPS28	yes	yes	no	yes	1.1744	2.91713	Class I-2	-0.405347	1.04455	0.710382	0.844734
YDR338C	YDR338C	no	yes	no	no	-0.1549	-0.536205		-0.416674	0.872571	0.549732
YDR339C	FCF1	no	yes	no	no	-0.0625779	-0.647433		-1.15942	0.146268	0.566174	-0.948711
YDR340W	YDR340W	no	yes				-1.93443		-0.418947	0.363248	0.0426811
YDR341C	YDR341C	no	yes	no	no	-0.369845	-0.901501	Class III	-1.21796	-0.387311	0.091136	-0.380504
YDR342C	HXT7	no	yes	no	no	0.16696	-1.41986	Class II	0.890329	1.6417	0.0118605	3.19239
YDR343C	HXT6	no	yes			1.21835	-3.07193	Class II	0.888413	1.61153	-0.0163981	3.19239
YDR344C	YDR344C	no	yes				-0.290576		-2.0704	#N/A
YDR345C	HXT3	no	yes	no	no	0.371303	-0.334723		-2.89469	-3.2693	-1.11412	-2.96185
YDR346C	SVF1	no	yes	no	no	-0.141477	-0.508552		-1.64871	-0.843758	0.0654337	0.837528
YDR347W	MRP1	yes	yes	no	no	0.0879625	0.308528	Class I-1	-0.385246	1.14929	0.795023	0.460949
YDR348C	YDR348C	no	yes	no	no	-0.0455107	-0.77308		-0.8173	0.162518	0.240304	-0.46764
YDR349C	YPS7	no	yes	no	no	0.331488	-0.454998		-0.688881	0.144198	0.0935648	-0.369234
YDR350C	ATP22	yes	yes	yes	yes	2.69961	2.62757	Class II	-0.0830093	1.2472	0.590694
YDR351W	SBE2	no	yes	no	no	0.030207	0.856541		-0.586515	0.633414	0.480415
YDR352W	YDR352W	no	yes	no	no	0.111947	-0.562149		-1.08651	-0.340288	0.00670398	-0.52878
YDR353W	TRR1	no	yes	no	no	-0.0553468	-0.440083		-1.59052	-0.692769	0.158241	-0.446336
YDR354W	TRP4	no	yes	no	no	0.267211	0.425468		-0.712554	-0.175548	-0.202508	-0.53647
YDR356W	SPC110	no	yes	no	no	-0.645319	-1.01846		-0.881856	0.147778	0.29012	-0.119961
YDR357C	CNL1	no	yes	no	no	-0.123075	-0.574666		0.637826	2.11372	0.736377	-0.198166
YDR358W	GGA1	no	yes	no	no	-0.298631	-0.891328		0.287878	1.07908	0.0516875	0.637186
YDR359C	EAF1	no	yes	no	no	0.163077	-0.243215		-0.370672	0.646658	0.277816	0.17585
YDR361C	BCP1	no	yes	no	no	0.0672414	-0.732055	Class III	-1.31884	-0.756915	-0.177584	-0.463585
YDR362C	TFC6	no	yes	no	no	-0.137932	-0.779362		-0.727419	0.0576371	0.0455421	0.169925
YDR363W	ESC2	no	yes	no	no	-0.456065	-0.93064		-0.531371	0.475904	0.267761
YDR363W-A	SEM1	no	yes	no	no	-0.12335	-0.820055		-0.591574	0.151133	0.00319349	0.177313
YDR364C	CDC40	no	yes	no	no	-0.109695	-0.644027		-0.955402	-0.0136353	0.202253	-0.269187
YDR365C	ESF1	no	yes	no	no	-0.315564	-0.506841		-1.09165	-1.90064	-1.54851	-0.854858
YDR365W-B	YDR365W-B	no	yes			#NAME?	-0.805159		-0.326836	0.556529	0.143851
YDR366C	YDR366C	no	yes			#NAME?	-0.960427		-0.779328	0.327624	0.367438
YDR367W	KEI1	no	yes	no	no	0.00126098	-0.721413		-1.26377	-0.499125	0.025132	-0.296088
YDR368W	YPR1	no	yes	no	no	-0.0625446	-0.512803		-1.0294	-0.174422	0.115459	0.31346
YDR369C	XRS2	no	yes	no	no	-0.10006	-0.624799		-0.423494	0.0880288	-0.227991
YDR370C	YDR370C	no	yes	no	no	0.218359	-0.0275405		-1.30553	0.515251	1.08126
YDR371W	CTS2	no	yes	no	no	0.0667194	-0.97432		-1.05443	0.0438313	0.358744	-1.58967
YDR372C	VPS74	no	yes	no	no	-0.229154	-0.927783		-1.10598	0.258841	0.625311	-0.257624
YDR373W	FRQ1	no	yes	no	no	-0.0758661	-0.651659		-0.736842	0.238008	0.235337	0.201176
YDR374C	YDR374C	no	yes			1.06635	-0.282355		1.96202	NA
YDR374W-A	YDR374W-A	no	yes	no	no	0.0198134	-0.643847		-0.657154	0.42871	0.34635
YDR375C	BCS1	yes	yes	yes	yes	1.4462	1.74405	Class I-1	-0.442202	0.67461	0.377298	0.281249
YDR376W	ARH1	yes	yes	yes	yes	1.81868	2.8145	Class I-2	-1.043	-0.0833435	0.220147	0.371815
YDR377W	ATP17	yes	yes	no	no	0.0426672	-0.483601	Class III	1.80657	2.88631	0.340228	2.01122
YDR378C	LSM6	no	yes	no	no	-0.0722918	-0.604431		-1.18914	-0.393624	0.0560022	-0.269237
YDR379C-A	YDR379C-A	no	yes	no	no	0.542101	-0.636411		1.6733	2.13894	-0.27388	0.746323
YDR379W	RGA2	no	yes	no	no	-0.267519	-0.920217		0.104423	0.961321	0.117384	0.388565
YDR380W	ARO10	no	yes	no	no	-0.330184	-0.666116		5.06947	5.71851	-0.0904759	0.709902
YDR381C-A	YDR381C-A	no	yes	no	no	0.440751	-0.605086		0.609723	2.14012	0.790886
YDR381W	YRA1	no	yes	no	no	-0.176203	-0.657644		-1.10642	-0.285313	0.0815921	-0.394309
YDR382W	RPP2B	no	yes	no	no	-0.142168	-0.549828		-1.4632	-1.086	-0.36232	-0.795743
YDR383C	NKP1	no	yes	no	no	-0.249564	-0.824303		-0.820877	0.0929345	0.174298	0.758294
YDR384C	ATO3	no	yes	no	no	0.165336	-0.587998	Class II	2.48087	2.95282	-0.267565	2.98424
YDR385W	EFT2	no	yes	no	no	-0.351209	-0.630369		-1.15261	-0.490577	-0.0774834	-0.477185
YDR386W	MUS81	no	yes	no	no	-0.231725	-0.95432		-0.468691	0.431552	0.160729
YDR387C	YDR387C	no	yes	no	no	0.1995	-0.594581		-0.149686	1.13498	0.545151
YDR388W	RVS167	no	yes	no	no	-0.13639	-0.654318		-0.744469	-0.20284	-0.197885	-0.174053
YDR389W	SAC7	no	yes	yes	no	1.99131	1.40538		-0.735183	0.567414	0.563084	-0.125531
YDR390C	UBA2	no	yes	no	no	-0.379974	-0.862217		-0.95779	-0.0258476	0.192429	0.231677
YDR391C	YDR391C	no	yes	no	no	-0.122012	-0.337294		-0.281901	0.732015	0.274402	-0.413676
YDR392W	SPT3	no	yes	no	no	-0.292033	-0.720075		-0.779566	0.0377142	0.0777667	-0.0916305
YDR393W	SHE9	yes	yes	yes	yes	1.50456	2.0659	Class I-2	0.117975	1.03055	0.173058	-0.992269
YDR394W	RPT3	no	yes	no	no	-0.209931	-0.657582		-0.900166	0.0293427	0.189995	0.0208853
YDR395W	SXM1	no	yes	no	no	-0.240006	-1.00591		-1.41726	-0.588038	0.0897114	-0.183604
YDR397C	NCB2	no	yes	no	no	0.154599	-0.443879		-0.885421	-0.195546	-0.0496391	-0.113159
YDR398W	UTP5	no	yes	no	no	0.0723548	-0.322649		-1.92255	-1.00929	0.173749	-0.630459
YDR399W	HPT1	no	yes	no	no	0.191968	-0.224165		-2.13928	-1.3375	0.0622619	-0.111378
YDR400W	URH1	no	yes	no	no	0.468068	0.333899		-1.23353	-0.15805	0.335963	-0.74426
YDR401W	YDR401W	no	yes			#NAME?	-1.13857		-0.754183	2.64955	2.66422
YDR402C	DIT2	no	yes			0.633401	-0.349471		-1.43029	0.386518	1.0773
YDR403W	DIT1	no	yes		no	-0.39635	-0.447165		0.145736	1.03658	0.151325
YDR404C	RPB7	no	yes	no	no	-0.0240201	-0.805259		-1.20661	-0.0736404	0.393457	0.0896959
YDR405W	MRP20	yes	yes	no	yes	0.193662	2.26833	Class I-1	0.354866	1.42155	0.327174	0.864345
YDR406W	PDR15	no	yes	no	no	0.801451	0.0846201		-0.76441	-2.21634	-2.19144	-0.652077
YDR406W-A	YDR406W-A	no	yes				-2.6125		-0.507461	NA
YDR407C	TRS120	no	yes	no	no	-0.136054	-0.848962		-1.02309	-0.022081	0.261492	1.0307
YDR408C	ADE8	no	yes	no	no	0.104315	-0.445377		-1.57214	-0.702807	0.129819	-1.13598
YDR409W	SIZ1	no	yes	no	no	0.246483	-0.645705		-0.314016	0.710152	0.284654
YDR410C	STE14	no	yes	no	no	0.0652424	-0.755297		-1.31791	-0.80095	-0.222554	-0.76651
YDR411C	DFM1	no	yes	no	no	0.120179	-0.841624		-0.203194	0.374744	-0.161576	-0.313865
YDR412W	RRP17	no	yes	no	no	-0.288951	-0.429933		-1.62642	-0.539391	0.347514	0.16214
YDR414C	ERD1	no	yes	no	no	0.296644	-0.969764		-2.07283	-0.585468	0.747853
YDR415C	YDR415C	no	yes	no	no	-0.0766477	-0.903296		-0.808911	0.242172	0.311569	0.770866
YDR416W	SYF1	no	yes	no	no	-0.0203134	-1.12398		-1.08488	-0.341903	0.00346379	-0.274175
YDR418W	RPL12B	no	yes	no	no	-0.138798	-0.460711		-1.52869	-0.460564	0.328608	-0.67699
YDR419W	RAD30	no	yes	no	no	-0.0566479	-0.708108		-0.872596	0.0337838	0.166866
YDR420W	HKR1	no	yes	no	no	0.452664	-0.83055		-0.726087	1.04042	1.02699
YDR421W	ARO80	no	yes	no	no	-0.522186	-1.08252		0.447576	1.1396	-0.0474869
YDR422C	SIP1	no	yes	no	yes	0.904251	1.965		-0.797419	0.188097	0.246002	-0.200299
YDR423C	CAD1	no	yes	no	no	-0.0870178	-0.539239		-0.29363	0.715776	0.269893
YDR424C	DYN2	no	yes	no	no	-0.281782	-0.862151		-0.472207	0.22693	-0.0403768	0.360402
YDR425W	SNX41	no	yes	no	no	0.290898	-0.030403		-0.093258	0.873517	0.227261	0.631757
YDR426C	YDR426C	no	yes			2.54029	-0.853511		-0.137511	NA
YDR427W	RPN9	no	yes	no	no	-0.30895	-1.01143		-1.01174	0.286075	0.558301	0.249335
YDR428C	B7	no	yes	no	no	0.0885912	-0.697105		-0.622938	0.63572	0.519144	-0.376634
YDR429C	TIF35	no	yes	no	no	-0.272446	-0.711547		-1.47853	-0.476308	0.262706	-0.324776
YDR430C	CYM1	yes	yes	no	yes	0.247472	1.62645	Class I-2	-0.474156	0.760315	0.494957	0.55018
YDR432W	NPL3	no	yes	no	no	-0.188172	-0.967206		-1.31747	-0.647962	-0.0700083	-0.345033
YDR433W	YDR433W	no	yes	no	no	-0.410854	-0.898889		-1.30024	-0.786256	-0.225534
YDR434W	GPI17	no	yes	no	no	-0.0631024	-0.803008		-0.994376	-0.0993153	0.155547	-0.062061
YDR435C	PPM1	no	yes	no	no	0.0429171	-0.378562		-0.321965	0.139068	-0.27848	0.192407
YDR436W	PPZ2	no	yes	no	no	0.777558	1.00983		0.0415758	0.839884	0.0587941	1.14374
YDR437W	GPI19	no	yes	no	no	-0.00585607	-0.656661		-0.0295633	0.81728	0.107329
YDR438W	THI74	yes	yes			-0.366603	-0.999529		-0.013611	2.89748	2.17158
YDR439W	LRS4	no	yes	no	no	0.18291	-0.0892403		-0.957922	0.380056	0.598464	-1.44057
YDR440W	DOT1	no	yes	no	no	-0.202281	-0.905285		-1.11144	-0.483493	-0.111569	-0.874469
YDR441C	APT2	no	yes	no	no	0.224618	-0.0896366		-0.677533	0.668168	0.606187	0.90852
YDR443C	SSN2	no	yes	no	no	0.0317735	-0.930491		-0.170025	0.418833	-0.150656	0.383329
YDR444W	YDR444W	no	yes	no	no	0.233006	-0.345988		-0.348126	0.571285	0.179898	0.449307
YDR446W	ECM11	no	yes			#NAME?	-0.0469058		-2.2079	0.649552	2.11794
YDR447C	RPS17B	no	yes	no	no	-0.205195	-0.474946		-1.44088	-0.395913	0.305449	-0.676593
YDR448W	ADA2	no	yes	no	no	-0.257856	-0.480475		-0.67207	0.329814	0.26237	-0.0800533
YDR449C	UTP6	no	yes	no	no	-0.0953376	-0.757613		-2.04512	-0.774255	0.531349	-0.450443
YDR450W	RPS18A	no	yes	no	no	-0.242321	-0.589432		-1.45163	-0.381964	0.330149	-0.656411
YDR451C	YHP1	no	yes	no	no	-0.00275661	-0.420758		-0.161697	0.920333	0.342516
YDR452W	PPN1	no	yes	no	no	0.0117254	-0.747948		-0.640799	0.229994	0.13128	0.756763
YDR453C	TSA2	no	yes	no	no	0.923975	-0.481965		0.426306	1.20925	0.0434289	2.00261
YDR454C	GUK1	no	yes	no	no	-0.145307	-0.453686		-1.34805	-0.11181	0.496724	-0.617874
YDR456W	NHX1	no	yes	no	no	-0.046783	-0.729753	Class II	-0.323845	0.652441	0.236772
YDR457W	TOM1	no	yes	no	no	-0.495445	-1.52146		-0.746231	0.0400155	0.0467333	-0.0874628
YDR458C	HEH2	no	yes	no	no	0.126538	-0.702037		-0.331272	0.333048	-0.075193	-0.202105
YDR459C	PFA5	no	yes		no	0.626017	-0.734925		-0.791163	0.534075	0.585724
YDR460W	TFB3	no	yes	no	no	0.0276755	-0.549738		-0.978597	0.0547618	0.293845	-0.393948
YDR461C-A	YDR461C-A	no	yes	no	no	0.0476887	-0.495732		0.912394	1.718	0.066091	2.06798
YDR461W	MFA1	no	yes	no	no	0.431523	-0.751756		-1.33883	0.842687	1.44201
YDR462W	MRPL28	yes	yes	no	no	0.0112395	-0.30869	Class I-1	-0.140661	0.858643	0.25979	0.660985
YDR463W	STP1	no	yes	no	no	0.202885	-0.741621		-0.551315	0.61092	0.422721
YDR464W	SPP41	no	yes	no	no	-0.45011	-1.03262		-0.873273	-0.0626127	0.0711465	-0.0544478
YDR465C	RMT2	no	yes	no	no	-0.0813922	-0.362741		-1.6939	-0.768455	0.185936	-0.528722
YDR466W	PKH3	no	yes	no	no	-0.282367	-0.986946		-0.223331	0.905342	0.389159	0.343954
YDR467C	YDR467C	no	yes				-1.61251		-3.08237	#N/A
YDR468C	TLG1	no	yes	no	no	0.0796149	-0.734065		-0.912445	0.0511192	0.22405	-0.493438
YDR469W	SDC1	no	yes	no	no	0.176172	-0.81628		-0.899383	0.28041	0.440279	-0.429067
YDR470C	UGO1	yes	yes	no	no	-0.193045	0.520188	Class II	0.0164723	1.24753	0.491549	0.895092
YDR471W	RPL27B	no	yes	no	no	-0.103725	-0.671642		-1.32914	-0.190647	0.398983	-0.709265
YDR472W	TRS31	no	yes	no	no	-0.476537	-0.836605		-1.45769	-0.29222	0.425956	-0.397257
YDR473C	PRP3	no	yes	no	no	-0.26248	-0.820937		-0.115596	0.375647	-0.24827	-0.0703893
YDR475C	JIP4	no	yes	no	no	-0.305463	-0.752449		0.0236027	0.720133	-0.0429833	-0.419225
YDR476C	YDR476C	no	yes	no	no	0.123247	-0.273242		-0.368088	0.331723	-0.0397026	0.199975
YDR477W	SNF1	no	yes	no	no	-0.0337509	-0.688419		-0.624933	0.750926	0.636346	0.236516
YDR478W	SNM1	yes	yes	no	no	0.495587	0.293689	Class III	-1.19295	0.221094	0.674531
YDR479C	PEX29	no	yes	no	no	0.0735663	-0.633499		0.335178	1.06855	-0.00614368	0.526069
YDR480W	DIG2	no	yes	no	no	-0.0362137	-0.700981		-0.938243	-0.433864	-0.235134
YDR481C	PHO8	no	yes	no	no	-0.0927873	-0.791103		-0.879086	-0.254523	-0.114951	-0.519781
YDR482C	CWC21	no	yes	no	no	0.686282	-0.342743		-0.555193	-0.015099	-0.199419	-2.19153
YDR483W	KRE2	no	yes	no	no	0.00788001	-0.650818		-1.04084	-0.0573437	0.243981	-1.06662
YDR484W	VPS52	no	yes	no	no	-0.123377	-0.854158		-0.674571	0.630555	0.565612	0.169925
YDR485C	VPS72	no	yes	no	no	-0.114394	-1.07218		-0.674131	0.664222	0.59884
YDR486C	VPS60	no	yes	no	no	-0.191908	-0.49242		-0.591089	0.888821	0.740397	0.0919225
YDR487C	RIB3	yes	yes	no	no	-0.0565299	-0.640768	Class III	-0.381526	0.624819	0.266831	-0.443302
YDR488C	PAC11	no	yes	no	no	-0.0886187	-0.528028		-0.687607	-0.577384	-0.62929	0
YDR489W	SLD5	no	yes	no	no	-0.01966	-0.696016		-1.43977	0.0088339	0.709094
YDR490C	PKH1	no	yes	no	no	0.0500014	-0.669354		-0.0986019	0.37959	-0.261322	0.317858
YDR491C	YDR491C	no	yes				-0.834895			#N/A
YDR492W	IZH1	no	yes	no	no	0.0721384	-0.547466		-1.07458	-0.546663	-0.211597
YDR493W	MZM1	no	yes	no	no	0.0545343	-0.172682	Class III	-0.462997	0.998298	0.721782	0.403105
YDR494W	RSM28	yes	yes	no	no	0.00345108	1.52772	Class I-1	-0.179331	1.43261	0.872432	0.920666
YDR495C	VPS3	no	yes	no	no	-0.212641	-1.12188		-0.3732	0.684318	0.318005	-0.0660892
YDR496C	PUF6	no	yes	no	no	-0.383234	-0.437849		-1.85628	-0.625245	0.491522	-0.429434
YDR497C	ITR1	no	yes	no	no	-0.0757122	-0.743973		-0.228387	0.931809	0.420682	-3.16746
YDR498C	SEC20	no	yes	no	no	-0.0674587	-0.567193		-0.692572	0.425011	0.37807	0.522227
YDR499W	LCD1	no	yes	no	no	-0.294764	-1.01319	Class III	-0.406477	0.489305	0.156269	-0.0395284
YDR500C	RPL37B	no	yes	no	no	-0.0523282	-0.297068		-1.38185	-0.607858	0.0344803	-1.25407
YDR501W	PLM2	no	yes	no	no	-0.271692	-0.51886		-1.48919	-0.0991642	0.650509
YDR502C	SAM2	no	yes	no	no	-0.194572	-0.831634		-1.55001	-0.355181	0.455312	-1.12994
YDR503C	LPP1	no	yes	no	no	-0.222674	-0.799782		-0.44768	0.301629	0.00979497
YDR504C	SPG3	no	yes			#NAME?	-0.275468		0.110609	#N/A
YDR505C	PSP1	no	yes	no	no	-0.264331	-0.67711		0.235517	1.26982	0.294793	0.44574
YDR506C	YDR506C	no	yes	no	no	-0.0800334	-0.734541		-0.416487	0.375259	0.0522323
YDR507C	GIN4	no	yes	no	no	-0.439225	-0.871343		-0.902808	-0.0528507	0.110444	-0.914852
YDR508C	GNP1	no	yes	no	no	-0.114425	-0.904877		-0.882891	0.0142379	0.157615	-0.968877
YDR509W	YDR509W	no	yes				-1.6125			#N/A
YDR510C-A	YDR510C-A	no	yes				-0.612503			#N/A
YDR510W	SMT3	no	yes	no	no	-0.103063	-0.508266		-0.879147	-0.415543	-0.27591	-0.188821
YDR511W	ACN9	yes	yes	no	no	-0.184679	-0.0530326	Class III	0.399088	1.73309	0.594491	1.07745
YDR512C	EMI1	no	yes	no	no	0.10132	-0.476549	Class III	0.0714357	0.891426	0.0804765	1.02196
YDR513W	GRX2	yes	yes	no	no	0.167265	-0.778764	Class III	0.481432	1.6672	0.446255	1.11635
YDR514C	YDR514C	no	yes	no	no	0.0360858	1.25306		-0.813269	0.522905	0.59666	-0.137504
YDR515W	SLF1	no	yes	no	no	0.0156252	-0.653939		-0.211869	1.69795	1.17031	0.362338
YDR516C	EMI2	no	yes	no	no	-0.312204	-0.87599		0.16931	-0.0699962	-0.97882	0.813809
YDR517W	GRH1	no	yes	no	no	0.139329	-0.611835		-0.777347	0.0739815	0.111814	-0.20327
YDR518W	EUG1	no	yes	no	no	-0.033459	-0.491064	Class II	-1.49588	-0.435615	0.320753	-0.408847
YDR519W	FPR2	no	yes	no	no	-0.105984	-0.575262		-0.675194	0.469914	0.405595	0.274803
YDR520C	URC2	no	yes	no	no	-0.0820357	-0.549165		-0.633691	0.373637	0.267814	2.11548
YDR521W	YDR521W	no	yes				-2.93443			#N/A
YDR522C	SPS2	no	yes			#NAME?	-0.0979365			NA
YDR523C	SPS1	no	yes			#NAME?	-0.538503		-2.02504	-0.350448	0.935075
YDR524C	AGE1	no	yes	no	no	0.561606	-0.124249		-0.588587	1.01842	0.867493
YDR524C-A	YDR524C-A	no	yes			#NAME?	-1.24993		-1.84533	#N/A
YDR524C-B	YDR524C-B	no	yes	no	no	0.293939	-0.384475		-0.868682	0.141019	0.270188
YDR525W	API2	no	yes			0.803321	-0.460499			-1.93541
YDR525W-A	S2	no	yes	no	no	0.308018	-0.595312		0.420131	2.11886	0.95922
YDR527W	RBA50	no	yes	no	no	0.0528528	-0.662973		-1.98798	-0.814395	0.434074	-0.972693
YDR528W	HLR1	no	yes	no	no	-0.0173366	-0.607366		-0.839749	-0.115344	-0.0151084
YDR529C	QCR7	yes	yes	no	no	-0.144291	-0.556861	Class III	1.28277	2.75164	0.729357	2.07487
YDR530C	APA2	no	yes	no	no	-0.255204	-0.643212		1.01522	2.41509	0.660356	0.688029
YDR531W	CAB1	no	yes	no	no	-0.0385751	-0.8297		-0.35901	0.443968	0.0634646	0.156411
YDR532C	KRE28	no	yes	no	no	-0.450566	-0.934431		-0.157	0.668289	0.0857749	-0.301854
YDR533C	HSP31	no	yes	no	no	0.32235	-0.599356		-0.722474	1.43846	1.42142	1.15211
YDR534C	FIT1	no	yes			0.910235	1.12446		0.784628	-2.22492	-3.74906
YDR535C	YDR535C	no	yes			#NAME?	-0.146185		1.76039	1.23451	-1.26539
YDR536W	STL1	no	yes			-1.10356	-1.08894		8.70049	6.52186	-2.91814	1.35267
YDR538W	PAD1	no	yes	yes	yes	1.52092	2.63197	Class II	-1.43449	-2.26999	-1.57501	1.85361
YDR539W	FDC1	no	yes	no	no	-0.0446753	-0.132929		-0.323992	0.61082	0.195298	-0.439682
YDR540C	IRC4	no	yes		no	0.530949	-1.10649		-2.3599	-2.31392	-0.693532
YDR541C	YDR541C	no	yes	no	no	-0.0643711	-0.484179		-1.75152	-0.702749	0.309259
YEL001C	IRC22	no	yes	no	no	-0.00166785	-0.598435		-1.19704	-0.0541352	0.403395	-0.823298
YEL002C	WBP1	no	yes	no	no	0.066674	-0.49079		-0.789473	0.143059	0.193018	-0.328265
YEL003W	GIM4	no	yes	no	no	-0.174671	-0.772411		-1.05819	-0.559658	-0.240977	-0.494765
YEL004W	YEA4	no	yes	no	no	0.114611	-0.81198		-0.0648058	0.81222	0.137512
YEL005C	VAB2	no	yes	no	no	-0.31075	-0.597416		0.285639	1.88796	0.862804
YEL006W	YEA6	yes	yes	no	no	0.339602	0.307429	Class III	-0.55826	0.379023	0.19777	-0.228269
YEL007W	YEL007W	no	yes	no	no	0.1673	-0.684847		-0.678805	0.519039	0.45833	-0.259926
YEL008C-A	YEL008C-A	no	yes			0.218359	-0.0665346		0.184417	NA
YEL008W	YEL008W	no	yes			#NAME?	0.153031		-1.03798	0.649552	0.948014
YEL009C	GCN4	no	yes	no	no	-0.376002	-0.926848		-0.0162374	-0.530269	-1.25354
YEL009C-A	YEL009C-A	no	yes			#NAME?	-0.553609		0.377062	1.97148	0.854905
YEL010W	YEL010W	no	yes				0.387499			NA
YEL011W	GLC3	no	yes	no	no	0.0435461	-0.901879		3.44916	3.44308	-0.745597	2.18153
YEL012W	UBC8	no	yes	no	no	-0.0213113	-0.51604		0.748851	2.09076	0.602393	0.966833
YEL013W	VAC8	no	yes	no	no	0.00583762	0.157667		-0.812604	-0.260736	-0.187646	-0.136002
YEL014C	YEL014C	no	yes				0.557423		0.962024	NA
YEL015W	EDC3	no	yes	no	no	-0.174082	-0.834715		-1.05535	-0.0437863	0.272047	0.0303882
YEL016C	NPP2	no	yes	no	no	0.369367	-0.517762		-0.726774	0.224136	0.211396
YEL017C-A	PMP2	no	yes	no	no	-0.0316367	-0.69614	Class II	-1.31461	0.503768	1.07886
YEL017W	GTT3	no	yes	no	no	-0.211245	-0.566283		-0.723489	-0.0640767	-0.0801011	0.189718
YEL018C-A	YEL018C-A	no	yes				1.55742			NA
YEL018W	EAF5	no	yes	no	no	0.307626	-0.51131		-0.865508	0.1763	0.302295	-0.750972
YEL019C	MMS21	no	yes	no	no	-0.0955317	-0.649763		-0.0206975	0.89748	0.178664
YEL020C	YEL020C	no	yes	no	no	-0.0411175	-0.402285		1.64593	2.33874	-0.0467003	0.887044
YEL020C-B	YEL020C-B	no	yes				0.124465		-0.622938	NA
YEL020W-A	TIM9	yes	yes	no	no	-0.285985	-0.327261	Class III	-0.267908	1.17385	0.702246	0.216542
YEL022W	GEA2	no	yes	no	no	-0.519354	-1.14476		-1.42247	-0.673294	0.00966378	-0.649467
YEL023C	YEL023C	no	yes			#NAME?	-0.612505		-0.16922	3.55644	2.98615	-1.24101
YEL024W	RIP1	yes	yes	no	yes	0.265996	2.84384	Class III	1.65712	2.93109	0.534463	1.94187
YEL025C	YEL025C	no	yes	no	no	-0.364938	-0.995933		-0.176569	-2.33565	-2.89859
YEL026W	SNU13	no	yes	no	no	-0.0342461	-0.500623		-1.8212	-0.817194	0.264488	-0.726554
YEL027W	VMA3	no	yes	no	no	0.0937786	-0.508417		-1.16055	-0.0727219	0.348314
YEL028W	YEL028W	no	yes			1.21836	-0.268549		-0.695088	0.649552	0.605127
YEL029C	BUD16	no	yes	no	no	0.339921	-0.418		-1.53817	-0.375714	0.42294	-0.603341
YEL030C-A	YEL030C-A	no	yes				-0.612507			NA
YEL030W	ECM10	yes	yes		yes	2.05661	2.14749	Class II	-0.293148	0.475523	0.0291571
YEL031W	SPF1	no	yes	no	no	-0.121562	-1.09809		-1.1281	-0.556015	-0.167428	-0.666168
YEL032W	MCM3	no	yes	no	no	0.244722	-0.427064		-0.798007	-0.0667227	-0.00822976	-0.931454
YEL033W	MTC7	no	yes			-0.0446752	-1.6125		-1.30368	-0.655302	-0.0911312
YEL034C-A	YEL034C-A	no	yes				1.84693		2.46452	NA
YEL034W	HYP2	no	yes	no	no	-0.281492	-0.601679		-1.34764	-0.532014	0.0761109	-0.102214
YEL036C	ANP1	no	yes	no	no	0.201752	-0.760381		-0.815286	-0.499952	-0.42418	-0.0296518
YEL037C	RAD23	no	yes	no	no	-0.0968262	-0.479412		-1.05639	-0.405099	-0.0882265	-0.33276
YEL038W	UTR4	no	yes	no	no	0.170838	-0.379586		-1.51046	-0.227798	0.543151	-0.241105
YEL039C	CYC7	yes	yes	no	no	-0.0209792	-0.834093	Class III	0.780418	1.02475	-0.49518	0.0856834
YEL040W	UTR2	no	yes	no	no	-0.0813537	-0.806787		-3.24447	-2.28399	0.220962	-2.57009
YEL041W	YEF1	no	yes	no	no	-0.459713	-0.802902		1.47786	1.92085	-0.296522
YEL042W	GDA1	no	yes	no	no	0.217859	-0.418416		-1.17067	-0.549935	-0.118775	-0.933736
YEL043W	YEL043W	no	yes	no	no	0.173571	-0.733928		-0.388654	0.478957	0.128098	0.0645403
YEL044W	IES6	no	yes	no	no	-0.0692175	-0.446548		-0.703002	0.394176	0.357665	1.12017
YEL045C	YEL045C	no	yes		no	-2.58899	-1.0474		-0.302718	-0.93541	-1.37221
YEL046C	GLY1	no	yes	no	no	0.0577129	-0.538432		-0.648262	-0.0320049	-0.123257	-1.55052
YEL047C	YEL047C	no	yes	no	no	0.056662	-0.229138	Class III	-0.878232	-0.0265335	0.112185	0.187454
YEL048C	TCA17	no	yes	no	no	-0.0373705	-0.540643		-1.80478	-0.856339	0.208924
YEL049W	PAU2	no	yes			0.218361	1.07555		-0.575632	NA
YEL050C	RML2	yes	yes	yes	yes	2.06713	3.52741	Class I-2	-0.175763	1.005	0.441254	1.23464
YEL051W	VMA8	no	yes	no	no	-0.350188	-0.689016		-1.18532	-0.326696	0.11911	-0.477019
YEL052W	AFG1	no	yes	yes	yes	2.39635	3.1719	Class II	-0.0207319	0.756641	0.0378597	0.376274
YEL053C	MAK10	no	yes	no	no	-0.15104	-0.974027		-0.929993	-0.164258	0.0262216
YEL054C	RPL12A	no	yes	no	no	-0.187011	-0.561013		-1.63731	-0.414965	0.482835	-0.67699
YEL055C	POL5	no	yes	no	no	-0.383881	-0.902093		-1.66365	-0.824749	0.0993907	-0.918406
YEL056W	HAT2	no	yes	no	no	-0.243512	-0.89825		-0.656581	-0.0398697	-0.122802	0.0986646
YEL057C	YEL057C	no	yes			0.080857	-0.415057		1.59207	3.33138	0.999788
YEL058W	PCM1	no	yes	no	no	-0.05279	-0.453962		-0.849036	0.0410151	0.150538	-0.457468
YEL059C-A	SOM1	yes	yes		no	1.31394	-0.211201	Class III	0.748318	2.80413	1.3163	-0.33665
YEL059W	HHY1	no	yes				0.194852		1.22506	NA
YEL060C	PRB1	no	yes	no	no	0.13794	-0.0128554		1.40213	2.10292	-0.0387274	1.68263
YEL061C	CIN8	no	yes	no	no	-0.00965674	-0.884168		-0.701326	0.580243	0.542055	0.235813
YEL062W	NPR2	no	yes	yes	yes	1.98282	1.92853		-0.432786	0.714596	0.407868	0.353637
YEL063C	CAN1	no	yes	no	no	-0.108164	-1.24896		-0.932886	-0.236565	-0.0431928
YEL064C	AVT2	no	yes	no	no	-0.0240487	-0.882424		-0.334881	0.865058	0.460426
YEL065W	SIT1	no	yes	no	no	0.294597	0.0305678		1.51826	1.32665	-0.931116
YEL066W	HPA3	no	yes	no	no	0.0844046	-0.38492		0.75164	1.6875	0.196343	0.527502
YEL067C	YEL067C	no	yes		no	2.80332	-0.197466		1.74163	1.06459	-1.41656
YEL068C	YEL068C	no	yes	no	no	0.0725082	-0.639854		-0.560654	-0.341459	-0.520319
YEL069C	HXT13	no	yes			#NAME?	0.97247			NA
YEL070W	DSF1	no	yes			0.218355	-1.09793		1.27753	2.36227	0.34523	0.400538
YEL071W	DLD3	no	yes	no	no	0.020828	-0.72876		-2.65042	-3.82342	-1.91252	-3.92621
YEL072W	RMD6	no	yes		no	-0.552159	-0.664498		-0.30101	2.45691	2.0184
YEL073C	YEL073C	no	yes	no	no	-0.161037	-0.734446		1.04449	3.04187	1.25787
YEL074W	YEL074W	no	yes				-0.612511		-0.55735	NA
YEL077C	YEL077C	no	yes				-0.612541		-0.621655	-0.322159	-0.440017
YER001W	MNN1	no	yes	no	no	-0.16921	-0.899314		-2.58014	-1.39734	0.443285	-1.66458
YER002W	NOP16	no	yes	no	no	-0.231289	-0.751544		-2.25444	-0.548043	0.966886	-0.769365
YER003C	PMI40	no	yes	no	no	-0.0323632	0.00186785		-1.26789	-0.298574	0.229801	-0.440853
YER004W	FMP52	no	yes	no	yes	0.988317	1.98898	Class III	-0.0106226	0.551948	-0.176943	0.941795
YER005W	YND1	no	yes	no	no	-0.138512	-0.620945		-0.846006	-0.491964	-0.385472
YER006C-A	YER006C-A	no	yes				-0.505588		-2.2079	NA
YER006W	NUG1	no	yes	no	no	-0.233422	-0.455051		-1.445	-0.643135	0.0623544	-0.797541
YER007C-A	TMA20	no	yes	no	no	-0.0886957	-0.615975		-1.19414	-0.0602155	0.394409	-0.0700446
YER007W	PAC2	no	yes	no	no	0.194708	-0.743748		-0.661073	0.318038	0.239598
YER008C	SEC3	no	yes	no	no	-0.45514	-1.10597		-0.838591	-0.0996785	-0.000600888	-0.207595
YER009W	NTF2	no	yes	no	no	-0.0121474	-0.602413		-1.10417	0.0616889	0.426347	-0.283049
YER010C	YER010C	no	yes	no	no	0.364158	-0.447504		-0.309699	1.55743	1.12762	1.47523
YER011W	TIR1	no	yes	no	no	1.19922	0.722147		-4.06478	-3.52037	-0.195111
YER012W	PRE1	no	yes	no	no	0.442615	0.76841		-1.16618	0.0705687	0.497232	0.0978697
YER013W	PRP22	no	yes	no	no	-0.32729	-1.01199		-0.954336	-0.239564	-0.0247409	-1.22239
YER014W	HEM14	yes	yes	yes	yes	2.25498	3.15482	Class II	-0.361398	0.176648	-0.201467	0.754328
YER015W	FAA2	no	yes	no	no	-0.294347	-0.763195		3.84892	6.82807	2.23964	3.33287
YER016W	BIM1	no	yes	no	no	-0.458453	-0.853434		-1.52672	-0.273339	0.51387	-0.354251
YER017C	AFG3	yes	yes	yes	yes	2.42199	3.17872	Class I-2	-0.253502	0.750113	0.264101	0.297985
YER018C	SPC25	no	yes	no	no	0.205459	-0.353894		-0.209379	0.65889	0.128756	-0.189195
YER019C-A	SBH2	no	yes	no	no	0.202978	-0.502097		-1.11033	-0.0461211	0.324694	-0.373612
YER019W	ISC1	yes	yes	no	no	0.207066	-0.260569		-1.22829	-0.711018	-0.222243	-0.235904
YER020W	GPA2	no	yes	no	no	0.550512	0.847437		0.263142	1.32708	0.324422	1.06547
YER021W	RPN3	no	yes	no	no	-0.230043	-1.12425		-1.11501	0.0139091	0.389402	0.0853915
YER022W	SRB4	no	yes	no	no	-0.273809	-0.793976		-0.701705	0.215282	0.177474	-0.484502
YER023C-A	YER023C-A	no	yes				-0.712039			NA
YER023W	PRO3	no	yes	no	no	-0.0484078	-0.403034		-0.982346	-0.251624	-0.00879175	-0.538035
YER024W	YAT2	yes	yes	no	no	-0.045681	-1.08829	Class II	1.87226	5.31441	2.70264	2.48649
YER025W	GCD11	no	yes	no	no	-0.175891	-0.877959		-1.27885	-0.441826	0.0975064	-0.578891
YER026C	CHO1	no	yes	no	no	-0.0742457	-0.810061		-0.39758	0.640951	0.299018	-0.435087
YER027C	GAL83	no	yes	no	no	0.0712281	-0.536641		-1.0708	-0.336422	-0.00513651	0.0160428
YER028C	MIG3	no	yes	no	no	0.983204	-0.47105		-3.69665	-6.26334	-3.3062
YER029C	SMB1	no	yes	no	no	-0.00447459	-0.591198		-0.970377	0.481403	0.712267	0.204548
YER030W	CHZ1	no	yes	no	no	-0.147908	-0.860138		-0.388232	1.05971	0.708433	0.494086
YER031C	YPT31	no	yes	no	no	0.0014383	-0.785632		-0.957357	-0.123236	0.094607	-0.398137
YER032W	FIR1	no	yes	no	no	-0.109695	-0.723361	Class II	-1.03174	0.16819	0.46042
YER033C	ZRG8	no	yes	no	no	-0.194598	-0.955391		0.107986	0.896235	0.0487351
YER034W	YER034W	no	yes	no	no	0.237218	-0.570862		-1.19717	-0.0844883	0.373172	-0.893715
YER035W	EDC2	no	yes	no	no	0.241549	-0.45927		0.434906	1.65401	0.479589
YER036C	ARB1	no	yes	no	no	-0.295026	-0.556825		-1.67049	-0.8157	0.115276	-0.740082
YER037W	PHM8	no	yes	no	no	0.152192	-0.96614		-0.692479	0.028064	-0.0189707
YER038C	KRE29	no	yes		no	-0.190447	-0.805148		-0.571799	-0.194797	-0.362511
YER038W-A	YER038W-A	no	yes			-0.10357	-0.849542		-1.2079	NA
YER039C	HVG1	no	yes			1.21835	0.387502		0.674328	NA
YER039C-A	YER039C-A	no	yes		no	0.488448	-0.358853		0.546987	1.97148	0.68498
YER040W	GLN3	no	yes	no	no	0.308911	-0.798894		-0.512144	0.601279	0.373909	-0.266646
YER041W	YEN1	no	yes		no	0.2684	-0.633262		-0.0060985	0.776932	0.0435165
YER042W	MXR1	no	yes	no	no	-0.0314358	-0.4939		-0.866209	0.235825	0.36252	0.100007
YER043C	SAH1	no	yes	no	no	-0.311583	-0.787185		-1.78329	-0.592774	0.451001	-0.599543
YER044C	ERG28	no	yes	no	no	-0.129259	-0.615888		-1.05405	0.0163647	0.330905	-0.0376335
YER044C-A	MEI4	no	yes				-1.21197		-0.667332	NA
YER045C	ACA1	no	yes	no	no	-0.11699	-0.533991		-0.643402	1.33191	1.2358
YER046W	SPO73	no	yes	no	no	0.0733087	-0.407493		0.099528	1.41943	0.580391	-0.181771
YER046W-A	YER046W-A	no	yes				-2.19746		-2.2079	NA
YER047C	SAP1	no	yes	no	no	0.00905975	0.464817		-0.368459	0.991178	0.620124	0.243043
YER048C	CAJ1	no	yes	no	no	-0.244161	-0.743356		-0.87072	-0.10422	0.0269866	-0.391927
YER048W-A	ISD11	yes	yes	no	no	-0.0378068	-0.82623	Class III	-0.589579	0.193112	0.0431779	0.326879
YER049W	TPA1	no	yes	no	no	-0.0447837	-0.115894		-2.1808	-1.76786	-0.326567	-1.10325
YER050C	RSM18	yes	yes	no	no	0.103179	-0.385228	Class I-1	-0.264016	1.52241	1.04691	0.964863
YER051W	JHD1	no	yes	no	no	-0.154553	-0.635464		-0.700343	0.881726	0.842555
YER052C	HOM3	no	yes	no	no	-0.104853	-0.880084		-1.27385	-0.635498	-0.101166	-0.509503
YER053C	PIC2	yes	yes	yes	yes	1.98996	2.3449	Class II	1.45726	2.78468	0.587904	0.791671
YER053C-A	YER053C-A	no	yes		no	0.703786	-1.0146		0.774515	1.95122	0.437193
YER054C	GIP2	no	yes		no	0.556775	-0.683343		4.02964	4.18911	-0.58004	2.58496
YER055C	HIS1	no	yes	no	no	-0.0295226	-0.42123		-2.70457	-2.37314	-0.408079	-1.94472
YER056C	FCY2	no	yes	no	no	-0.0856221	-1.00042		-1.6902	-1.0767	-0.12601	-2.20163
YER056C-A	RPL34A	no	yes	no	no	-0.237368	-0.482218		-1.43732	-0.568415	0.129394	-0.631158
YER057C	HMF1	no	yes	no	no	0.24581	-0.530834	Class III	0.147369	1.40245	0.515566	0.270479
YER058W	PET117	yes	yes	no	no	0.0694957	-0.549225	Class I-1	-0.0379755	0.671118	-0.0304204	1.04827
YER059W	PCL6	no	yes	no	no	0.0420364	-0.660469		-0.728456	0.387083	0.376025	0.708345
YER060W	FCY21	no	yes	no	no	-0.234153	-1.05837		-2.13462	-1.10802	0.287086
YER060W-A	FCY22	no	yes		no	-0.618144	-1.02403		-1.64132	-1.00206	-0.100256
YER061C	CEM1	yes	yes	yes	yes	1.96438	2.65758	Class II	-1.21815	0.149734	0.628371	-0.0960627
YER062C	HOR2	no	yes	no	no	0.260482	-0.321219		-2.12602	-1.43472	-0.0482128	-1.66579
YER063W	THO1	no	yes	no	no	-0.16195	-0.779839		-0.517555	0.245875	0.0239159	0.100557
YER064C	YER064C	no	yes	no	no	-0.129752	-0.585753		-0.40209	0.368444	0.03102
YER065C	ICL1	no	yes		no	-0.0828105	-0.313711		2.91662	7.8448	4.18867	3.76353
YER066C-A	YER066C-A	no	yes				0.387499		-0.0379755	NA
YER067C-A	YER067C-A	no	yes				-1.72798		-0.207901	NA
YER067W	RGI1	no	yes	no	no	0.0127362	-0.718044		3.61923	3.2128	-1.14594	2.20193
YER068W	MOT2	no	yes	no	no	-0.126298	-0.831726		-0.409944	0.794441	0.464872	0.0233235
YER069W	ARG5,6	yes	yes	yes	yes	1.91094	3.15629	Class II	-0.906978	-0.444506	-0.277041	0.487161
YER070W	RNR1	no	yes	no	no	0.421499	-0.12674	Class III	-0.63648	0.26233	0.159296	-1.64322
YER071C	YER071C	no	yes	no	no	0.0570253	-0.853268		-0.430293	1.35537	1.04615	0.432692
YER072W	VTC1	no	yes	no	no	-0.110771	-0.744074		-1.45858	-0.233198	0.485873	-1.93133
YER073W	ALD5	yes	yes	no	yes	0.211415	2.28999	Class III	-0.759315	-0.506366	-0.486565	-0.520916
YER074W	RPS24A	no	yes	no	no	-0.180534	-0.532829		-1.46492	-0.91262	-0.187219	-0.679447
YER074W-A	YOS1	no	yes	no	no	-0.193579	-0.689963		-0.804385	0.0238043	0.0886755	0.0105803
YER075C	PTP3	no	yes	no	no	0.19846	0.130954		-0.540313	0.55573	0.35653
YER076C	YER076C	no	yes		no	-0.525301	-0.370842		-0.424999	-0.493052	-0.807567
YER076W-A	YER076W-A	no	yes			#NAME?	-1.90796			-0.350448
YER077C	YER077C	no	yes	yes	yes	1.48399	2.33753	Class I-2	-0.778488	0.541781	0.580755	0.247928
YER078C	ICP55	no	yes	yes	yes	1.9047	2.85599	Class I-2	-1.12008	-0.192137	0.188426	-0.166227
YER078W-A	YER078W-A	no	yes			#NAME?	-1.89261		-2.2079	NA
YER079W	YER079W	no	yes	no	no	0.225472	-0.616022		1.269	2.34353	0.335018	0.0482029
YER080W	AIM9	no	yes	yes	yes	1.76479	3.44665	Class II	-0.386151	0.620068	0.266705	0.581743
YER081W	SER3	no	yes	no	no	0.206246	-0.530851		-0.285148	-2.098	-2.55237	-2.01729
YER082C	UTP7	no	yes	no	no	-0.081339	-0.58934		-1.44393	-0.674731	0.0296873	-0.435776
YER083C	GET2	no	yes	no	no	0.0775631	-0.655655		-1.1337	-0.33336	0.0608304	-1.26829
YER084W	YER084W	no	yes		no	-0.547176	-0.284081		-1.30101	0.327624	0.889121
YER085C	YER085C	no	yes			#NAME?	-0.110002			NA
YER086W	ILV1	yes	yes	yes	yes	2.07314	2.8172	Class II	-1.68215	-0.86242	0.0802159	-0.554291
YER087C-A	YER087C-A	no	yes			-0.781641	0.387496		-0.622938	NA
YER087C-B	SBH1	no	yes	no	no	0.101186	-0.556668		-1.51244	-0.681774	0.0911504	-1.31464
YER087W	AIM10	no	yes	yes	yes	1.35755	2.60449	Class I-2	-0.248436	0.838642	0.347564	0.453678
YER088C	DOT6	no	yes	no	no	-0.0805034	-0.698465		-0.0955044	0.813187	0.169178	-2.77761
YER088C-A	YER088C-A	no	yes		no	0.463936	-0.327774		-1.45905	-0.262985	0.456553
YER088W-B	YER088W-B	no	yes				0.387496		-0.400546	NA
YER089C	PTC2	no	yes	no	no	0.157159	-0.0310447		-0.96211	-0.541996	-0.319399	0.05942
YER090W	TRP2	no	yes	no	no	-0.173444	-0.864016		-1.18359	-0.213299	0.230776	-0.504777
YER091C	MET6	no	yes	yes	yes	1.50365	1.82322		-0.948153	-0.60132	-0.39268	-1.53989
YER091C-A	YER091C-A	no	yes			#NAME?	-1.09793		0.114028	NA
YER092W	IES5	no	yes	no	no	-0.0520928	-0.571128		-0.281201	0.606555	0.148243	-0.571576
YER093C	TSC11	no	yes	no	no	-0.391241	-0.964921		-0.580413	0.667279	0.508178	2.49075
YER093C-A	AIM11	no	yes	no	no	0.598631	-0.477151		0.312211	1.77809	0.726361
YER094C	PUP3	no	yes	no	no	-0.0335565	-0.375049		-0.751688	-0.260161	-0.247987	0.0633182
YER095W	RAD51	no	yes	no	no	0.0728304	-0.64774		-0.407329	-0.19653	-0.528715	-0.409014
YER096W	SHC1	no	yes		no	-0.220526	-0.305179	Class III	0.537527	1.21892	-0.0581223
YER097W	YER097W	no	yes		no	0.411004	-0.695644		-1.34283	-0.350448	0.252869
YER098W	UBP9	no	yes	no	no	-0.0800807	-0.221979		0.434928	1.23018	0.0557338	1.19265
YER099C	PRS2	no	yes	no	no	-0.0310344	-0.735834		-0.816902	0.0736657	0.151054	0.258119
YER100W	UBC6	no	yes	no	no	0.0459185	-0.539082		-0.831525	0.448584	0.540595	-0.724027
YER101C	AST2	no	yes	no	no	0.263256	-0.0460237		0.312211	1.94842	0.896696	0.0991934
YER102W	RPS8B	no	yes	no	no	-0.170904	-0.487766		-1.54582	-0.666205	0.140101	-0.610222
YER103W	SSA4	no	yes	no	no	0.234165	-0.565597		0.0593217	0.0650228	-0.733813	1.30103
YER104W	RTT105	no	yes	no	no	-0.563461	-0.70523		-0.594083	-0.0497881	-0.195219
YER105C	NUP157	no	yes	no	no	-0.0154551	-0.797924		-1.0523	-0.192663	0.120123	-0.0366807
YER106W	MAM1	no	yes			-2.36661	-2.05729			-1.93541
YER107C	GLE2	no	yes	no	no	-0.111989	-0.759704		-1.15045	-0.217112	0.193825	-0.302098
YER109C	FLO8	no	yes	no	no	0.490612	-0.889389		-0.507082	0.553975	0.321543
YER110C	KAP123	no	yes	no	no	-0.284594	-0.825325		-1.36541	-0.584935	0.0409624	-0.646763
YER111C	SWI4	no	yes	no	no	-0.0685532	-0.814323		-0.44729	0.805672	0.513448	0.460974
YER112W	LSM4	no	yes	no	no	0.0480185	-0.694712		-0.75775	0.835012	0.853249	-0.0127839
YER113C	TMN3	no	yes	no	no	-0.0132179	-0.724546		-0.576354	0.489512	0.326352	0.121306
YER114C	BOI2	no	yes	no	no	-0.327304	-0.773546		-0.711934	-0.076035	-0.103615	0.0130169
YER115C	SPR6	no	yes		no	1.69229	-0.343686		0.194789	1.34045	0.406146
YER116C	SLX8	no	yes	no	no	0.520388	-0.702701		-0.179918	1.05338	0.49378
YER117W	RPL23B	no	yes	no	no	-0.100027	-0.264481		-1.38183	-0.34359	0.298728	-0.668974
YER118C	SHO1	no	yes	no	no	0.278608	-0.710387		-1.04824	-0.0441164	0.264614	-1.2841
YER119C	AVT6	no	yes	no	no	0.0965573	-0.719347		-0.189753	0.270157	-0.279604
YER119C-A	YER119C-A	no	yes			#NAME?	-0.612503		2.37706	NA
YER120W	SCS2	no	yes	no	no	-0.0789756	-0.523335		-0.913972	-0.0896229	0.0848355	-0.278186
YER121W	YER121W	no	yes		no	0.00263037	-0.388186		4.24496	4.8701	-0.114369
YER122C	GLO3	no	yes	no	no	0.00457183	-0.600556		-1.10719	-0.161934	0.20574	-0.544921
YER123W	YCK3	no	yes	no	no	-0.078977	-0.778896		-0.634977	0.46716	0.362624	-0.42166
YER124C	DSE1	no	yes	no	no	0.209314	-0.263705		-0.865676	0.323661	0.449824
YER125W	RSP5	no	yes	no	no	-0.0222456	0.0188275		-0.626427	0.10916	-0.00392664	-0.000725337
YER126C	NSA2	no	yes	no	no	0.00649107	-0.54254		-1.65616	-0.373766	0.542884	-0.745298
YER127W	LCP5	no	yes	no	no	-0.225449	-0.604439		-1.94666	-1.07187	0.135271	-0.383287
YER128W	YER128W	no	yes	no	no	-0.388902	-0.489522		-0.64086	0.712484	0.61383
YER129W	SAK1	no	yes	no	no	0.04891	-0.745157		-0.721827	0.015464	-0.00222263	-0.847997
YER130C	YER130C	no	yes	no	no	0.185938	-0.740608		-0.681464	0.435022	0.376972
YER131W	RPS26B	no	yes	no	no	-0.139032	-0.568433		-1.63322	-0.297022	0.59669	0.22542
YER132C	PMD1	no	yes	no	no	-0.583808	-0.839224		-0.897549	0.0191469	0.177182
YER133W	GLC7	no	yes	no	no	-0.161424	-0.981239		-0.664517	0.615814	0.540818	0.176226
YER134C	YER134C	no	yes	no	no	-0.0612582	-0.570443		-0.825672	0.434918	0.521077	-0.0281717
YER135C	YER135C	no	yes			1.54029	-0.52504		0.69899	NA
YER136W	GDI1	no	yes	no	no	-0.0815093	-0.757041		-0.431046	0.605046	0.296578	-0.0114747
YER137C	YER137C	no	yes		no	-0.447222	-0.275468		-0.834442	-0.278298	-0.183369	-0.521537
YER138W-A	YER138W-A	no	yes		no		-1.95539		-0.523614	2.97148	2.75558
YER139C	RTR1	no	yes	no	no	-0.0428029	-0.619116		0.327021	0.700731	-0.365804	-0.0940435
YER140W	YER140W	no	yes	no	no	0.0704257	-0.939057		-0.814597	0.18426	0.259344
YER141W	COX15	yes	yes	yes	yes	2.06158	3.14057	Class I-2	-0.356611	0.884343	0.50144	0.458788
YER142C	MAG1	no	yes	no	no	-0.45514	-1.02353		-0.134652	0.808456	0.203594	0.624683
YER143W	DDI1	no	yes	no	no	-0.178596	-0.892207		-0.0390969	0.873517	0.1731	-0.0318953
YER144C	UBP5	no	yes	no	no	0.233466	-0.443891		-0.431527	0.961097	0.65311	0.485427
YER145C	FTR1	no	yes	no	no	0.208286	0.0385826		0.299024	0.210408	-0.828129	-1
YER145C-A	YER145C-A	no	yes				-1.02754		0.755574	NA
YER146W	LSM5	no	yes	no	no	-0.0193954	-0.429624		-1.42468	-1.11839	-0.433224	-0.22987
YER147C	SCC4	no	yes	no	no	-0.291553	-0.839321		-0.601511	0.377401	0.239399
YER148W	SPT15	no	yes	no	no	-0.305146	-0.69671		-1.07157	0.105214	0.43727	-0.198242
YER148W-A	YER148W-A	no	yes				-1.24053		-1.51602	NA
YER149C	PEA2	no	yes	no	no	0.179453	-0.448855		-1.01213	-0.0559054	0.21671	-1.0583
YER150W	SPI1	no	yes	no	no	0.874789	-0.0791546		1.67233	1.94427	-0.467569
YER151C	UBP3	no	yes	no	no	0.89909	1.46442		-1.09015	-0.0220116	0.328628	-0.450153
YER152C	YER152C	no	yes	no	no	0.296458	0.286123		-0.654999	0.0330789	-0.0514355	-0.103836
YER152W-A	YER152W-A	no	yes				0.165104		0.962024	NA
YER153C	PET122	yes	yes	no	no	-0.114216	0.595875	Class III	-0.859977	0.336136	0.456599	1.62059
YER154W	OXA1	yes	yes	yes	yes	2.07969	2.57549	Class I-2	-0.224389	0.643186	0.128061	0.413591
YER155C	BEM2	no	yes	no	no	0.0381244	0.482673		-1.07851	0.129556	0.468553	-0.214125
YER156C	YER156C	no	yes	no	no	-0.186882	-0.593081		-1.31686	-0.40933	0.168014	-0.0102023
YER157W	COG3	no	yes	no	no	-0.539071	-0.990572		-1.07598	-0.19867	0.137791	-0.584963
YER158C	YER158C	no	yes	no	no	0.339525	1.15924		0.863687	1.99469	0.391488	-0.409763
YER158W-A	YER158W-A	no	yes			-1.78164	-0.912063		2.18442	NA
YER159C	BUR6	no	yes	no	no	0.240274	-0.409776		-0.833505	0.649552	0.743544	0.326904
YER161C	SPT2	no	yes	no	no	-0.0548952	-0.657069		-1.23027	0.322646	0.8134	0.0830557
YER162C	RAD4	no	yes	no	no	-0.149481	-0.871139		0.338126	0.881336	-0.196304	1.05772
YER163C	YER163C	no	yes	no	no	0.0842662	0.112827		-0.850071	0.0769736	0.187531	-1.23226
YER164W	CHD1	no	yes	no	no	-0.610496	-0.897507		-1.11069	-0.169801	0.201375	-0.403647
YER165C-A	YER165C-A	no	yes				0.972462			NA
YER165W	PAB1	no	yes	no	no	-0.261083	-0.721618		-1.09573	-0.452252	-0.0960365	-0.488877
YER166W	DNF1	no	yes	no	no	-0.0748935	-0.985129		-0.703035	0.0743502	0.0378711	-0.167805
YER167W	BCK2	no	yes	no	no	-0.531097	-0.958781		-0.310806	1.0657	0.636993
YER168C	CCA1	yes	yes	no	no	-0.0822049	0.870037	Class III	-1.18465	-0.323091	0.122047	-0.0955999
YER169W	RPH1	no	yes	no	no	0.092524	-0.305937		-1.1025	-0.0173213	0.345661	0.557995
YER170W	ADK2	yes	yes	no	yes	0.805567	2.17356	Class II	0.359504	1.74388	0.644862
YER171W	RAD3	no	yes	no	no	-0.487105	-0.860782		-1.12085	-0.0430191	0.338321	-0.19878
YER172C	BRR2	no	yes	no	no	-0.475214	-1.30802		-1.03316	-0.303436	-0.00978843	0.0336127
YER173W	RAD24	no	yes	no	no	-0.0546592	-0.485013		-0.874277	0.548014	0.682778
YER174C	GRX4	no	yes	no	no	-0.046126	-0.772968		-0.222851	1.33717	0.820512	0.600019
YER175C	TMT1	no	yes	no	no	0.0114846	-1.05316		0.508307	1.41025	0.162432	0.23092
YER175W-A	YER175W-A	no	yes		no		-1.21851		0.283953	NA
YER176W	ECM32	no	yes	no	no	-0.434873	-0.901525		-0.799546	-0.66023	-0.600198	-0.691878
YER177W	BMH1	no	yes	no	no	-0.0511367	-0.637638		-0.479369	0.179752	-0.0803922	-0.131657
YER178W	PDA1	yes	yes	no	yes	0.0904339	2.40439	Class III	-0.313951	0.43867	0.0131078	-0.0545208
YER179W	DMC1	no	yes			0.261428	-0.50425		-0.0379755	1.14705	0.445514	2.48187
YER180C	ISC10	no	yes				-1.29057		-1.37463	-2.35045	-1.71534
YER180C-A	SLO1	no	yes	no	no	0.19873	-0.417311		-0.831525	0.0112267	0.103238	0.557826
YER182W	FMP10	yes	yes	yes	yes	1.3842	2.52817	Class I-2	0.547693	1.73179	0.444584	1.0587
YER183C	FAU1	no	yes	no	no	-0.0714908	0.0482847	Class III	-1.05465	-0.0409032	0.274237	-0.256261
YER184C	YER184C	no	yes		no	0.0840571	-0.965175		0.169549	0.108984	-0.800078
YER185W	PUG1	no	yes		no	0.677791	-0.650638		-0.572312	1.64955	1.48235
YER186C	YER186C	no	yes			3.02571	-0.159991		-0.401412	3.42214	3.08404
YER188C-A	YER188C-A	no	yes			#NAME?	-2.48697		-1.62294	NA
YER188W	YER188W	no	yes			0.130896	-0.197466		-2.06034	-0.556898	0.763931
YER190W	YRF1-2	no	yes				1.70949		-0.701395	-0.37497	-0.413088	0.14439
YFL001W	DEG1	no	yes	no	no	0.752607	1.05361	Class III	-0.804034	0.0962987	0.160819	-0.584963
YFL002C	SPB4	no	yes	no	no	0.145682	-0.033176		-1.22384	0.0781215	0.56245	-0.109163
YFL003C	MSH4	no	yes		no	-0.00402966	-0.575029		-0.435311	-0.115982	-0.420185
YFL004W	VTC2	no	yes	no	no	-0.340886	-0.650823		-1.06595	-0.279488	0.0469481	-0.765138
YFL005W	SEC4	no	yes	no	no	-0.0445329	-0.771357		-0.78738	0.354647	0.402514	-0.0296777
YFL007W	BLM10	no	yes	no	no	-0.403709	-1.32409		-0.55335	-0.00463932	-0.190803	0.517937
YFL008W	SMC1	no	yes	no	no	0.423599	0.0247901		-1.05861	-0.128467	0.190632	0.0174346
YFL009W	CDC4	no	yes	no	no	-0.280743	-0.804503		-0.968182	-0.277027	-0.048358
YFL010C	WWM1	no	yes	no	no	0.225399	-0.57601		-1.03408	0.0589453	0.353508	-0.921061
YFL011W	HXT10	no	yes			3.02572	0.766009		1.18442	2.34999	0.426062
YFL012W	YFL012W	no	yes			2.09283	-1.50559			NA
YFL012W-A	YFL012W-A	no	yes				0.387499			NA
YFL013C	IES1	no	yes	no	no	-0.543157	-0.92936		-0.591183	0.5272	0.378869	0.0660172
YFL014W	HSP12	no	yes	no	no	0.94359	0.160452		2.67498	2.65132	-0.763175	2.13527
YFL015C	YFL015C	no	yes				-3.61249			NA
YFL015W-A	YFL015W-A	no	yes			#NAME?	0.387498			NA
YFL016C	MDJ1	yes	yes	yes	yes	1.56634	3.42339	Class II	0.00580618	1.22084	0.475518	0.491813
YFL017C	G1	no	yes	no	no	-0.180457	-0.570683		-0.524758	0.454474	0.239718	0.356609
YFL017W-A	SMX2	no	yes	no	no	0.041606	-0.59405		-0.330385	1.10481	0.695678	0.182739
YFL018C	LPD1	yes	yes	no	yes	0.00179923	2.19301	Class II	0.997894	2.12709	0.389682	1.27587
YFL019C	YFL019C	no	yes				-1.29057			NA
YFL020C	PAU5	no	yes			1.74192	1.15303		-0.369181	0.456907	0.0865751
YFL021C-A	YFL021C-A	no	yes				-0.612498		-0.30101	NA
YFL021W	GAT1	no	yes	no	no	-0.0339089	-0.643095		-0.0667892	0.967846	0.295122	-0.450972
YFL022C	FRS2	no	yes	no	no	-0.146769	-0.654245	Class III	-1.41759	-0.469326	0.208749	-0.445634
YFL023W	BUD27	no	yes	no	no	-0.424849	-0.723978		-1.09883	-0.361139	-0.00181851	-0.190398
YFL024C	EPL1	no	yes	no	no	-0.21328	-0.838355		-0.954976	-0.220708	-0.0052459	0.387023
YFL025C	BST1	no	yes	no	no	-0.0977738	-0.830487		-0.788608	0.596811	0.645905
YFL026W	STE2	no	yes	no	no	-0.198723	-1.00627		-1.86304	-0.825247	0.298275	-3.91754
YFL027C	GYP8	no	yes	no	no	-0.0251351	-0.527015	Class III	-1.27399	0.611078	1.14555	-0.420843
YFL028C	CAF16	no	yes	no	no	0.0659779	-0.46834		-0.46861	0.24157	-0.0293342	-0.108287
YFL029C	CAK1	no	yes	no	no	-0.392527	-0.610647		-0.424999	0.214615	-0.0998997	-0.286523
YFL030W	AGX1	no	yes		no	0.756779	-0.0601716	Class III	5.77984	9.56605	3.0467	3.59036
YFL031W	HAC1	no	yes	no	no	-0.370161	-0.632403		-0.913132	0.815303	0.988921
YFL032W	YFL032W	no	yes			-0.588996	-0.801981		-1.03451	NA
YFL033C	RIM15	no	yes	no	no	-0.288909	-0.7567		-0.224344	0.46658	-0.0485889	0.478047
YFL034C-A	RPL22B	no	yes	no	no	-0.13459	-0.906323		-1.27619	0.110115	0.646786	-0.459432
YFL034C-B	MOB2	no	yes	no	no	0.202103	-0.366075		-0.935018	0.468065	0.66357	-0.120546
YFL034W	YFL034W	no	yes	no	no	-0.107258	-0.958349		-0.730701	0.0684768	0.0596637
YFL036W	RPO41	yes	yes	no	yes	0.395557	2.56145	Class I-2	0.0933181	0.962305	0.129474	-1.08746
YFL037W	TUB2	no	yes	no	no	-0.000615934	-0.6155		-0.963302	-0.30063	-0.0768412	-0.241661
YFL038C	YPT1	no	yes	no	no	-0.0531005	-0.715929		-0.339859	0.420037	0.0203827	0.015715
YFL039C	ACT1	no	yes	no	no	-0.0424783	-0.671945		-0.818659	0.147765	0.22691	0.00436207
YFL040W	YFL040W	no	yes			1.21837	-1.93444			NA
YFL041W	FET5	no	yes	no	no	0.28498	0.020754		-0.0786561	0.683976	0.0231187	0.33376
YFL042C	YFL042C	no	yes	no	no	0.266243	0.655585		0.517722	1.09651	-0.160731	1.08246
YFL044C	OTU1	no	yes	no	no	0.0370914	-0.607352		0.22836	0.897659	-0.0702154	1.11154
YFL045C	SEC53	no	yes	no	no	-0.234158	-0.533092		-1.23431	-0.477396	0.0174001	-0.650491
YFL046W	FMP32	yes	yes	no	yes	1.12811	2.26008	Class III	-0.453811	1.30304	1.01733	0.0931794
YFL047W	RGD2	no	yes	no	no	-0.423506	-0.674466		-1.07446	-0.117309	0.217641	-0.750474
YFL048C	EMP47	no	yes	no	no	-0.144625	-0.544137		-0.834837	0.177065	0.272388	-0.0288549
YFL049W	SWP82	no	yes	no	no	-0.0328401	-0.630514		-0.750855	-0.0494147	-0.0380729	0.358454
YFL050C	ALR2	no	yes			#NAME?	-1.09794		-0.551621	0.415087	0.227194	-1.03103
YFL052W	YFL052W	no	yes		no	-0.951565	-1.15565		3.60313	5.22849	0.885847
YFL053W	DAK2	no	yes			2.33383	-0.699971			-2.67238		0.886343
YFL054C	YFL054C	no	yes	no	no	0.580929	-0.363682		0.377062	-1.05446	-2.17104
YFL055W	AGP3	no	yes			0.596871	-0.322996		0.864328	2.35737	0.75353
YFL056C	AAD6	no	yes			-0.267068	0.0793751		-0.642567	-2.35045	-2.44739
YFL059W	SNZ3	no	yes			-2.19668	-1.09793		1.48479	4.11745	1.89314	2.05943
YFL062W	COS4	no	yes			0.633399	-3.41985		-1.08447	-0.0333635	0.311595
YFL064C	YFL064C	no	yes			#NAME?	-1.61249		-0.996846	0.529258	0.78659
YFR001W	LOC1	no	yes	no	no	-0.239911	-0.579517		-1.16099	0.0698408	0.491319	-0.277273
YFR002W	NIC96	no	yes	no	no	-0.293738	-0.972526		-1.10391	-0.0062075	0.358184	-0.178825
YFR003C	YPI1	no	yes	no	no	-0.108597	-0.709889		-0.66358	0.264219	0.188286	0.22747
YFR004W	RPN11	no	yes	no	no	-0.157863	-0.633418		-0.953621	-0.0552164	0.158891	-0.141687
YFR005C	SAD1	no	yes	no	no	0.0924366	-0.834617		-1.08329	-0.164841	0.178932	-0.273018
YFR006W	YFR006W	no	yes	no	no	-0.182341	-0.900461		0.0691339	0.744342	-0.0643052	0.464061
YFR007W	YFH7	no	yes	no	no	0.38521	-0.3757		-0.542596	1.0672	0.870283	-0.163014
YFR008W	FAR7	no	yes	no	no	0.192914	-0.623287		0.0192993	0.902533	0.14372	0.367371
YFR009W	GCN20	no	yes	no	no	-0.527556	-1.11592		-1.49855	-0.647763	0.11127	-0.543383
YFR009W-A	YFR009W-A	no	yes	no	no	-0.7188	-1.61772		-1.47192	-0.398811	0.333591
YFR010W	UBP6	no	yes	no	no	-0.13007	-0.673163		-0.669859	0.392947	0.323292	0.3067
YFR011C	AIM13	no	yes	no	no	-0.102133	0.0747458	Class III	1.20218	2.3447	0.403007	1.1437
YFR012W	YFR012W	no	yes			-1.589	-0.779613		-2.94487	NA
YFR012W-A	YFR012W-A	no	yes				1.3875		-0.622938	NA
YFR013W	IOC3	no	yes	no	no	-0.31633	-0.743641		-0.887719	0.0177155	0.165921	-1.4521
YFR014C	CMK1	no	yes	no	no	-0.321044	-0.771291		0.797122	1.76653	0.229898	1.3306
YFR015C	GSY1	no	yes	no	no	-0.0626506	-0.851266		1.32292	0.974043	-1.08839	1.33054
YFR016C	YFR016C	no	yes	no	no	-0.638501	-1.15709		-0.424732	0.0148606	-0.299921	-0.155394
YFR017C	YFR017C	no	yes	no	no	0.918126	-0.312132		3.23676	3.84476	-0.131514	2.04727
YFR018C	YFR018C	no	yes	no	no	0.198368	-0.270053		-0.357452	0.0824201	-0.299641	0.587402
YFR019W	FAB1	no	yes	no	no	0.161725	0.11112		-0.371993	0.287469	-0.0800521	-0.251539
YFR020W	YFR020W	no	yes		no	0.00263061	-0.555919		-0.806802	-2.12806	-2.06077
YFR021W	ATG18	no	yes	no	no	-0.17743	-0.0858993		-1.00403	-0.168022	0.0964929	0.486987
YFR022W	ROG3	no	yes	no	no	-0.355376	-0.45892		-0.512755	0.956734	0.729975
YFR023W	PES4	no	yes			2.54029	1.41216		-0.529829	0.234515	0.0248298
YFR024C-A	LSB3	no	yes	no	no	-0.215703	-0.251222		-0.679962	0.086849	0.0272974	-0.0884586
YFR025C	HIS2	no	yes	no	no	0.029739	-0.696903		-0.912712	0.212387	0.385586	-0.342624
YFR026C	ULI1	no	yes			-0.518606	-0.322997		0.165558	NA
YFR027W	ECO1	no	yes	no	no	0.00350823	-0.90548		-1.01373	0.713683	0.987897
YFR028C	CDC14	no	yes	no	no	0.106644	-0.626467		-1.19074	-0.412398	0.0388269	-0.252326
YFR029W	PTR3	no	yes	no	no	0.126437	-0.492708		-0.341717	0.688774	0.290977
YFR030W	MET10	no	yes	no	no	0.475135	0.456002		-0.188876	0.505988	-0.0446504	-1.8294
YFR031C	SMC2	no	yes	no	no	-0.0318283	-0.890159		-0.889013	-0.223256	-0.0737564	0.024453
YFR031C-A	RPL2A	no	yes	no	no	-0.104815	-0.515437		-1.59602	-0.763233	0.0932773	-0.646845
YFR032C	RRT5	no	yes			0.633397	-0.55361		-5.26679	-2.85295	1.67433
YFR032C-A	RPL29	no	yes	no	no	-0.252325	-0.474485		-1.36769	-0.394012	0.234169	-0.662594
YFR032C-B	YFR032C-B	no	yes		no	-0.629638	-0.887079		-0.622938	0.0645899	-0.0519858
YFR033C	QCR6	yes	yes	no	no	-0.314115	-0.564532	Class III	1.20503	2.39162	0.447071	0.890327
YFR034C	PHO4	no	yes	no	no	0.228613	-0.474603		-0.0510317	0.178399	-0.510083
YFR034W-A	YFR034W-A	no	yes		no	0.783144	-0.412894		0.168475	2.34999	1.442
YFR035C	YFR035C	no	yes				-0.0719342		2.62499	1.81948	-1.54503
YFR036W	CDC26	no	yes	no	no	0.128629	-0.275468		-0.342129	0.380665	-0.0167195	-0.715432
YFR036W-A	YFR036W-A	no	yes				-2.6125			NA
YFR037C	RSC8	no	yes	no	no	-0.142947	-0.559258		-0.733395	-0.211498	-0.217617	-0.240003
YFR038W	IRC5	no	yes	no	no	-0.367624	-0.869551		-1.06173	0.00596216	0.328178	-1.25376
YFR039C	YFR039C	no	yes	no	no	0.0764166	-0.595779		-0.820602	0.147975	0.229063	-0.678072
YFR040W	SAP155	no	yes	no	no	-0.0110296	-0.751		0.0584123	1.13746	0.33953	0.427492
YFR041C	ERJ5	no	yes	no	no	0.00428435	-0.710545		-0.313419	0.458492	0.0323968	-0.194512
YFR042W	KEG1	no	yes	no	no	-0.00835061	-0.836963		-1.10636	0.605006	0.971855
YFR043C	IRC6	no	yes	no	no	0.118292	-0.720456		0.0844211	1.12798	0.30405	0.303392
YFR044C	DUG1	no	yes	no	yes	0.400138	2.76793	Class I-2	-0.31562	0.496818	0.0729243	0.253248
YFR045W	YFR045W	yes	yes	yes	yes	1.46085	2.31716	Class I-2	0.339695	1.74731	0.668097	0.635428
YFR046C	CNN1	no	yes	no	no	0.452824	-0.654938		-0.35359	0.902972	0.517048
YFR047C	B6	no	yes	no	no	-0.0438957	-0.517371		-0.797697	-0.244001	-0.185818	0.0605896
YFR048W	RMD8	no	yes	no	no	-0.13133	-0.570091		-0.849515	0.162201	0.272202	0.360176
YFR049W	YMR31	yes	yes	no	no	-0.0944618	-0.513904	Class III	1.83318	2.90424	0.331554	2.09382
YFR050C	PRE4	no	yes	no	no	-0.0364434	-0.602917		-1.11056	0.0654981	0.436545	0.294838
YFR051C	RET2	no	yes	no	no	-0.0588763	-0.967996		-1.22783	-0.291721	0.196597	-0.232661
YFR052C-A	YFR052C-A	no	yes	no	no	-0.0608855	-0.697638		2.68756	2.08265	-1.34442
YFR052W	RPN12	no	yes	no	no	-0.105178	-0.711222		-0.952166	0.516739	0.729391	-0.10859
YFR053C	HXK1	no	yes	no	no	0.166447	-0.604191		2.67503	2.46502	-0.949529	2.56339
YFR054C	YFR054C	no	yes				-4.31293			NA
YFR055W	IRC7	no	yes	no	no	-0.446728	-0.515798		-2.0852	-2.15988	-0.814199
YGL001C	ERG26	no	yes	no	no	-0.145966	-0.600556		-1.45154	-0.137568	0.574456	-0.67494
YGL002W	ERP6	no	yes	no	no	-0.0833788	-0.878038		-0.853368	0.536265	0.650119
YGL003C	CDH1	no	yes	no	no	0.174505	-0.274232		-0.303478	1.00578	0.569745
YGL004C	RPN14	no	yes	no	no	0.0825167	-0.764908		-0.417748	0.310282	-0.0114836	-0.0757589
YGL005C	COG7	no	yes	no	no	-0.1428	-0.708664		-0.184132	0.496043	-0.059338	0.170544
YGL006W	PMC1	no	yes	no	no	0.0224822	-0.984341		0.748869	1.6156	0.127213	0.902618
YGL006W-A	YGL006W-A	no	yes		no	2.21836	-0.74577		-0.985508	#N/A
YGL007C-A	YGL007C-A	no	yes			0.803322	-1.13188		0.962024	#N/A
YGL007W	BRP1	no	yes			#NAME?	-0.612503		-0.622938	#N/A
YGL008C	PMA1	no	yes	no	no	-0.135525	-1.00832	Class II	-1.55154	-0.694212	0.117811	-1.50519
YGL009C	LEU1	no	yes	no	no	-0.293162	-0.797434		-1.29709	-0.381668	0.175907	-1.75119
YGL010W	YGL010W	no	yes	no	no	-0.103569	-0.81594		0.0988754	1.41238	0.573987
YGL011C	SCL1	no	yes	no	no	-0.0692226	-0.699498		-1.10548	-0.118511	0.247459	0.0588498
YGL012W	ERG4	no	yes	no	no	0.094812	-0.620179		-1.68984	-0.801531	0.148791	-1.00294
YGL013C	PDR1	no	yes	no	no	-0.0638795	-0.374826		-0.731785	0.0310113	0.0232822	-0.407175
YGL014C-A	YGL014C-A	no	yes				-2.19746			#N/A
YGL014W	PUF4	no	yes	no	no	0.258252	0.427866		-1.07262	-0.473948	-0.140843	-0.602193
YGL015C	YGL015C	no	yes				-1.19747		-2.2079	#N/A
YGL016W	KAP122	no	yes	no	no	-0.505745	-1.18038		-1.70305	-1.03282	-0.0692863	-0.140481
YGL017W	ATE1	no	yes	no	no	-0.351957	-0.685621		-1.65077	-0.286722	0.624537	0.269187
YGL018C	JAC1	yes	yes	no	yes	0.504663	2.06858	Class I-1	-0.411434	1.12747	0.799385	0.344335
YGL019W	CKB1	no	yes	no	no	-0.231107	-0.694486		-0.677834	-0.417919	-0.479598	-0.104237
YGL020C	GET1	no	yes	no	no	-0.113506	-0.886144		-0.999886	-0.354431	-0.0940591	0.349113
YGL021W	ALK1	no	yes	no	no	-0.602397	-1.1523		-1.43842	-0.138052	0.560851	0.771089
YGL022W	STT3	no	yes	no	no	0.0425507	-0.795631		-1.17909	-0.510301	-0.0707282	-0.00810505
YGL023C	PIB2	yes	yes	no	no	-0.41068	-0.245031	Class III	-0.536197	0.442158	0.238842	0.0969856
YGL024W	YGL024W	no	yes				-2.19747		0.962024	#N/A
YGL025C	PGD1	no	yes	no	no	0.130051	-0.774425		-0.930672	0.261554	0.452713	0.155228
YGL026C	TRP5	no	yes	no	no	-0.31382	-0.84363		-1.14195	-0.428267	-0.0258313	-0.452664
YGL027C	CWH41	no	yes	no	no	0.00292718	-0.653409		-1.2814	-0.286793	0.255089	-0.344605
YGL028C	SCW11	no	yes	no	no	0.189591	-0.706046		-1.41846	-0.550945	0.128003
YGL029W	CGR1	no	yes	no	no	-0.144211	-0.561405		-1.9117	-0.8791	0.293086
YGL030W	RPL30	no	yes	no	no	-0.148971	-0.601643		-1.51915	-0.539478	0.240161	-0.62514
YGL031C	RPL24A	no	yes	no	no	-0.35994	-0.678659		-1.49697	-0.772543	-0.0150897	-0.575266
YGL032C	AGA2	no	yes	no	no	0.139971	-1.05275		-1.78757	-0.710129	0.337926
YGL033W	HOP2	no	yes			0.748875	-0.509409		-0.453013	2.06459	1.77809
YGL035C	MIG1	no	yes	no	no	-0.0564451	-0.559421		-0.479148	0.0182792	-0.242086	0.181838
YGL036W	YGL036W	no	yes	no	no	0.00414869	-0.847583		-0.87022	-0.148943	-0.0182362	-0.447459
YGL037C	PNC1	no	yes	no	no	0.081208	-0.690277		0.262086	0.834671	-0.166929	0.810343
YGL038C	OCH1	no	yes	no	no	0.0025522	-0.86635		0.0703498	1.19151	0.381651	0.531664
YGL039W	YGL039W	no	yes	no	no	0.0140006	-0.392738		-0.935666	0.167756	0.363908	-0.881874
YGL040C	HEM2	no	yes	no	no	0.0180605	-0.3792		0.0797648	1.24439	0.425109	0.530064
YGL041C	YGL041C	no	yes			#NAME?	-2.00482		0.962024	NA
YGL041W-A	YGL041W-A	no	yes	no	no	-0.0863098	-0.233195		-0.288113	1.32606	0.874659
YGL042C	YGL042C	no	yes				0.709424		2.0775	NA
YGL043W	DST1	no	yes	no	no	-0.064792	-0.804259		-0.776526	0.190822	0.227834	-0.582209
YGL044C	R15	no	yes	no	no	-0.0957495	-0.692936		-0.9803	-0.160457	0.0803291	-0.368087
YGL045W	RIM8	no	yes	no	no	0.336195	-0.411516		0.372245	1.12974	0.0179839
YGL047W	ALG13	no	yes	no	no	-0.273494	-0.842623		-0.545401	-0.296171	-0.490283	-0.343205
YGL048C	RPT6	no	yes	no	no	-0.16835	-0.860918		-1.18627	-0.241328	0.205432	0.00629464
YGL049C	TIF4632	no	yes	no	no	-0.55664	-1.13664		-1.21396	-0.39615	0.0782919	-0.308311
YGL050W	TYW3	no	yes	no	no	-0.101182	-0.63045		-1.18023	-0.532445	-0.091731	-0.578928
YGL051W	MST27	no	yes			#NAME?	-0.449004		-1.84533	-1.57927	-0.47345
YGL052W	YGL052W	no	yes			#NAME?	-0.894903		-0.333431	-1.35045	-1.75653
YGL053W	PRM8	no	yes	no	no	-0.363328	-0.872495		-0.035585	1.52496	0.821036	0.343954
YGL054C	ERV14	no	yes	no	no	-0.0564787	-0.847464		-0.841716	0.460248	0.562451	-0.230183
YGL055W	OLE1	no	yes	no	no	-0.1619	-0.801537		-0.316837	0.505355	0.0826775	-0.834042
YGL056C	SDS23	no	yes	no	no	0.114415	-0.715263		0.312593	1.32574	0.273631	1.19598
YGL057C	GEP7	no	yes	no	no	0.739475	1.53192	Class III	0.0564401	1.76304	0.967084	0.716693
YGL058W	RAD6	no	yes	no	no	0.169924	-0.301552		-1.10232	-0.319404	0.0434	-0.0870782
YGL059W	PKP2	yes	yes	no	yes	0.38984	1.66928	Class I-2	0.111538	1.57155	0.720498	0.913585
YGL060W	YBP2	no	yes	no	no	0.0385381	-1.07771		-1.10518	-0.0770997	0.288571	-0.519195
YGL061C	DUO1	no	yes	no	no	0.0335762	-0.306364		-1.16752	0.181244	0.609251	-0.0973968
YGL062W	PYC1	no	yes	no	no	-0.168671	-0.709278		1.24408	2.02302	0.0394299	0.223487
YGL063C-A	YGL063C-A	no	yes				-0.975074			#N/A
YGL063W	PUS2	yes	yes		yes	1.14082	3.43228		-1.06062	-0.169875	0.151235
YGL064C	MRH4	yes	yes	yes	yes	2.29989	3.03503	Class I-2	-0.622938	0.318955	0.202379	0.0531113
YGL065C	ALG2	no	yes	no	no	-0.322531	-1.13476		-0.979605	0.273804	0.513895	-0.340714
YGL066W	SGF73	no	yes	no	no	-0.0308277	-0.803975		-0.61135	0.322797	0.194633	-0.50696
YGL067W	NPY1	no	yes	no	no	0.129964	-0.377569		-0.944355	0.32138	0.526222	-0.266046
YGL068W	MNP1	yes	yes	no	yes	0.284829	2.24002	Class I-2	-0.28541	0.917978	0.463875	0.591849
YGL069C	YGL069C	no	yes				0.387499		0.546987	-0.350448	-1.63695
YGL070C	RPB9	no	yes	no	no	-0.0132766	-0.540028		-0.927331	-0.309981	-0.122163	-0.137649
YGL071W	AFT1	no	yes	no	no	-0.469967	-0.514589		-0.605804	0.466688	0.332978
YGL072C	YGL072C	no	yes		no	-1.10357	-0.48377		-0.207901	1.64955	1.11794
YGL073W	HSF1	no	yes	no	no	0.112749	-0.509635		-0.458009	0.559116	0.277611	-0.331844
YGL075C	MPS2	no	yes	no	no	-0.022649	-0.638975		-0.241067	0.551705	0.0532588
YGL076C	RPL7A	no	yes	no	no	-0.271399	-0.716663		-1.47903	-0.435277	0.304241	-0.762249
YGL077C	HNM1	no	yes	no	no	-0.1914	-1.00373		-1.13716	-0.297633	0.100015	-2.57568
YGL078C	DBP3	no	yes	no	no	-0.113662	-0.628822		-1.35672	-0.514664	0.102543	-0.720873
YGL079W	KXD1	no	yes	no	no	-0.183503	-0.697306		-0.255519	0.863952	0.379957	1.06935
YGL080W	FMP37	no	yes	no	no	0.167606	-0.747407	Class II	0.176984	1.45855	0.542049	1.09031
YGL081W	YGL081W	no	yes		no	0.383945	-0.706685		1.23504	1.35737	-0.617185
YGL082W	YGL082W	no	yes	no	no	-0.197406	-0.882935		-0.758564	0.135697	0.154747	0.310985
YGL083W	SCY1	no	yes	no	no	0.120879	0.158763		-1.24959	-0.175454	0.334619	-0.205469
YGL084C	GUP1	no	yes	no	no	-0.103569	-1.02048		-0.439064	0.533228	0.232779	0.258988
YGL085W	LCL3	no	yes	no	no	0.262753	0.614184	Class III	-0.272441	-0.278657	-0.74573
YGL086W	MAD1	no	yes	no	no	-0.11606	-0.95392		-1.10536	0.493174	0.859019	-0.400412
YGL087C	MMS2	no	yes	no	no	0.249175	-0.567023		-0.565875	0.742087	0.568448	0.0593296
YGL088W	YGL088W	no	yes	no	no	0.437833	-0.309232		-0.802791	-1.67238	-1.6091
YGL089C	MF(ALPHA)2	no	yes			#NAME?	0.194852		-2.43029	-2.35045	-0.659668
YGL090W	LIF1	no	yes		no	-0.735837	-0.186577		-0.264145	0.920406	0.445037
YGL091C	NBP35	yes	yes	no	no	-0.0553138	-0.64156		-0.762412	0.263507	0.286406
YGL092W	NUP145	no	yes	no	no	0.607543	1.36635		-0.770495	0.150178	0.181159	-0.166938
YGL093W	SPC105	no	yes	no	no	-0.559476	-0.749404		-0.825341	-0.0601403	0.0256867
YGL094C	PAN2	no	yes	no	no	0.151729	-0.734494		-0.962844	-0.211249	0.012081	1.02209
YGL095C	VPS45	no	yes	no	no	-0.205228	-0.92935		-0.710768	0.349451	0.320705	0.140068
YGL096W	TOS8	no	yes	no	no	0.155428	-0.459491		0.635524	3.63408	2.25904
YGL097W	SRM1	no	yes	no	no	0.0245874	0.170915		-1.24943	-0.579446	-0.0695266	-0.459567
YGL098W	USE1	no	yes	no	no	-0.403129	-0.923964		-0.596587	0.478752	0.335825	-0.15078
YGL099W	LSG1	no	yes	no	no	-0.380612	-0.836852		-1.79994	-0.81739	0.243032	-0.215195
YGL100W	SEH1	no	yes	no	no	-0.0130081	-0.663791		-1.00387	-0.288973	-0.0246152	-0.0213285
YGL101W	YGL101W	no	yes	no	no	-0.028908	-0.758307		-1.19276	-0.304247	0.148996	-0.447789
YGL103W	RPL28	no	yes	no	no	-0.218129	-0.643396		-1.46318	-0.564437	0.159232	-0.662705
[truncated: 4,116 more rows]
